# Supplementary material for: Integration of transcriptomics and metabolomics reveals toxicological mechanisms of ZhuRiHeng drop pill in the 180-day repeated oral toxicity study
Source: Front Pharmacol. 2024 Mar 15;15:1333167. doi: 10.3389/fphar.2024.1333167 (PMC10978746; doi:10.3389/fphar.2024.1333167)
Supplement: Supplementary file 7 [file Table8.XLSX]

## Sheet: HDG-vs-CG-diff-metabolites
ID	m/z	Retention time (min)	Ion mode	Metabolites	HMDB	METLIN	Lipidmaps	kegg	PubChem	CAS	InChIKey	Super Class	Class	Sub Class	level	Score	Fragmentation Score	Adducts	Formula	Mass Error (ppm)	VIP	P-value	adj.P-value	log2(FC)	FC	average(HDG)	average(CG)	HDG_1	HDG_2	HDG_3	HDG_4	HDG_5	HDG_6	CG_1	CG_2	CG_3	CG_4	CG_5	CG_6
10.30_501.2852n	502.292	10.3043	pos	LysoPE(20:4(5Z,8Z,11Z,14Z)/0:0)	HMDB0011517	46715	LMGP02050009		42607465	652149-09-2	ROPRRXYVXLDXQO-XSQXPFHXSA-N	Lipids and lipid-like molecules	Glycerophospholipids	Glycerophosphoethanolamines	***	74.8	90.7	M+H, M+Na, M+H-H2O	C25H44NO7P	-0.718194	27.1143	0.0491579	0.329915	-0.544229	0.685758	1.11118e+07	1.62037e+07	1.30849e+07	1.0676e+07	1.3525e+07	1.11112e+07	6.95891e+06	1.1315e+07	1.75157e+07	2.38838e+07	1.46268e+07	1.92767e+07	1.14299e+07	1.04892e+07
1.04_307.0838n	306.077	1.04432	neg	Glutathionate(1-)	HMDB0062697				745		RWSXRVCMGQZWBV-UHFFFAOYSA-N	Organic acids and derivatives	Carboxylic acids and derivatives	Amino acids, peptides, and analogues	***	65.9	66.5	M-H, 2M-H	C10H17N3O6S	0.0463632	16.3828	0.00360303	0.129948	0.61694	1.53362	3.6885e+06	2.4051e+06	3.24577e+06	2.80386e+06	3.54119e+06	4.13176e+06	4.62257e+06	3.78586e+06	2.99206e+06	2.94941e+06	1.90945e+06	1.88754e+06	2.01545e+06	2.67666e+06
10.44_544.2684m/z	544.268	10.4404	neg	PS(20:4(5Z,8Z,11Z,14Z)/0:0)		46725	LMGP03050007		42607475		XHWSRRGLFMDBOB-RRJHOXOUSA-N	Lipids and lipid-like molecules	Glycerophospholipids	Glycerophosphoserines	***	69.3	68.3	M-H	C26H44NO9P	0.569015	16.1173	0.00736055	0.174532	-0.820606	0.566204	1.91199e+06	3.37685e+06	2.52529e+06	1.59933e+06	2.28699e+06	1.76057e+06	1.57875e+06	1.721e+06	3.87275e+06	4.75389e+06	3.39064e+06	3.7156e+06	2.59312e+06	1.93512e+06
1.37_132.1019m/z	132.102	1.36962	pos	L-Isoleucine	HMDB0000172	5193	LMFA01100047	C00407	6306	73-32-5	AGPKZVBTJJNPAG-WHFBIAKZSA-N	Organic acids and derivatives	Carboxylic acids and derivatives	Amino acids, peptides, and analogues	***	78.3	98.3	M+H	C6H13NO2	-0.180741	14.2394	0.00156614	0.0932459	-0.241903	0.845629	5.61708e+06	6.64249e+06	5.59678e+06	5.44498e+06	5.97115e+06	5.34043e+06	6.10594e+06	5.24321e+06	6.28825e+06	6.11784e+06	6.35549e+06	6.7908e+06	7.34358e+06	6.95899e+06
6.26_330.1681n	329.161	6.25955	neg	tetranor-PGFM	HMDB0258925	36188			3082337	23109-94-6	IGRHJCFWWOQYQE-UHFFFAOYSA-N	Lipids and lipid-like molecules	Fatty Acyls	Eicosanoids	*	52.9	68	M-H, M+FA-H, 2M-H	C16H26O7	0.691484	14.0006	0.00267999	0.114959	8.0929	273.027	935834	3427.62	554256	726902	1.72409e+06	1.0326e+06	1.42049e+06	156675	3277.03	4430.34	3586.29	3259.06	2932.29	3080.71
0.71_196.0583n	195.051	0.709183	neg	Gluconic acid	HMDB0000625	345		C00257	10690	526-95-4	RGHNJXZEOKUKBD-SQOUGZDYSA-N	Organic oxygen compounds	Organooxygen compounds	Carbohydrates and carbohydrate conjugates	***	74	95.6	M-H, 2M-H	C6H12O7	-0.0393992	13.5497	0.00449617	0.142835	0.423643	1.34131	3.80546e+06	2.83712e+06	3.77615e+06	3.6451e+06	3.98445e+06	3.74827e+06	3.61837e+06	4.0604e+06	3.07048e+06	2.42058e+06	3.97336e+06	2.65265e+06	2.22206e+06	2.6836e+06
0.70_162.1124m/z	162.112	0.699383	pos	L-Carnitine	HMDB0000062			C00318			PHIQHXFUZVPYII-ZCFIWIBFSA-O	Organic nitrogen compounds	Organonitrogen compounds	Quaternary ammonium salts	***	62.6	46.5	M+H	C7H15NO3	-0.363408	12.8254	0.00171985	0.0969762	-0.44549	0.734335	2.34363e+06	3.1915e+06	1.81665e+06	2.32506e+06	2.3233e+06	2.36388e+06	2.79163e+06	2.44125e+06	3.42374e+06	2.71836e+06	3.7585e+06	2.85745e+06	3.18252e+06	3.20842e+06
0.72_118.0861m/z	118.086	0.715617	pos	3-Amino-3-methylbutanoic acid	HMDB0245806	449944			2760933		NFQAIWOMJQWGSS-UHFFFAOYSA-N	Organic acids and derivatives	Carboxylic acids and derivatives	Amino acids, peptides, and analogues	***	64.7	59.9	M+H	C5H11NO2	-0.913793	12.7229	0.0331668	0.287716	0.26358	1.20045	6.79092e+06	5.65696e+06	7.46756e+06	7.31151e+06	5.35251e+06	6.20737e+06	7.21749e+06	7.1891e+06	5.0235e+06	4.74444e+06	5.67414e+06	5.8162e+06	5.77071e+06	6.91279e+06
0.73_134.1175m/z	134.117	0.731017	pos	Diisopropanolamine	HMDB0251354	44741			8086	110-97-4	LVTYICIALWPMFW-UHFFFAOYSA-N	Organic nitrogen compounds	Organonitrogen compounds	Amines	**	63.7	25.7	M+H	C6H15NO2	-0.547702	11.1257	0.0265094	0.265099	-1.19626	0.436406	610955	1.39997e+06	775023	715081	733190	574594	380297	487544	2.50139e+06	1.66616e+06	1.70649e+06	1.20753e+06	912535	405697
10.26_499.2696n	544.268	10.2595	neg	Osimertinib	HMDB0248778				71496458		DUYJMQONPNNFPI-UHFFFAOYSA-N	Organoheterocyclic compounds	Indoles and derivatives	N-alkylindoles	*	48.5	46.9	M-H, M+FA-H	C28H33N7O2	0.0185709	9.71512	0.0427914	0.313643	-0.553601	0.681317	1.24489e+06	1.82718e+06	1.3712e+06	1.5613e+06	1.56906e+06	1.28951e+06	624234	1.05402e+06	1.63355e+06	2.02785e+06	1.48975e+06	2.76045e+06	1.50241e+06	1.54905e+06
10.22_423.3344n	424.342	10.2151	pos	O-Linoleoylcarnitine	HMDB0240780		LMFA07070092		51000598		MJLXQSQYKZWZCB-UTJQPWESSA-N	Lipids and lipid-like molecules	Fatty Acyls	Fatty acid esters	***	65.3	32.4	M+H, M+Na	C25H45NO4	-1.13386	9.61897	0.0143784	0.218255	0.641867	1.56035	1.52645e+06	978274	1.43887e+06	1.35168e+06	1.90726e+06	1.54232e+06	1.23113e+06	1.68741e+06	590720	533411	1.14751e+06	833092	1.31065e+06	1.45426e+06
10.52_425.3503n	426.358	10.5229	pos	2-Hydroxyhexadecanoylcarnitine	HMDB0013337						HOAMADDCQBUDDY-JCKUYFFHSA-N	Lipids and lipid-like molecules	Fatty Acyls	Fatty acid esters	***	67.1	65.6	M+H, M+Na	C25H47NO4	-0.457706	8.52117	0.00657663	0.166623	0.641958	1.56045	1.10983e+06	711225	1.05371e+06	929710	1.4466e+06	1.15756e+06	873672	1.19772e+06	518081	492742	1.02972e+06	773942	691076	761793
0.79_176.0321n	175.025	0.794433	neg	Ascorbic acid	HMDB0000044	320050		C01041	54670067		CIWBSHSKHKDKBQ-JLAZNSOCSA-N	Organoheterocyclic compounds	Dihydrofurans	Furanones	***	75.7	98.9	M-H, M+FA-H	C6H8O6	-0.0839406	8.33382	0.000267631	0.0430701	0.495369	1.40968	1.10531e+06	784082	1.02444e+06	1.03657e+06	1.09811e+06	1.1751e+06	1.09722e+06	1.2004e+06	784746	641714	741480	784319	737194	1.01504e+06
4.85_344.1474n	343.14	4.8452	neg	Iridotrial glucoside		41169	LMPR0102070024	C11653	443335		MRIFZKMKTDPBHR-MDHPXLNESA-N	Lipids and lipid-like molecules	Prenol lipids	Isoprenoids	*	50.2	55.3	M-H, M+FA-H	C16H24O8	0.798503	8.317	0.00617856	0.162872	8.35169	326.669	350967	1074.38	146990	238474	263311	434225	817502	205301	754.212	642.974	739.244	1965.77	1138.98	1205.1
6.66_541.2259m/z	541.226	6.65527	neg	Betamethasone 17-benzoate	HMDB0249158				571358		SOQJPQZCPBDOMF-UHFFFAOYSA-N	Lipids and lipid-like molecules	Steroids and steroid derivatives	Hydroxysteroids	*	38	0	M+FA-H	C29H33FO6	3.14523	7.46736	0.0225452	0.253416	0.539974	1.45395	1.10048e+06	756889	907045	865575	742630	1.31426e+06	1.39736e+06	1.37599e+06	802684	733648	795295	703418	912186	594103
5.69_513.2761n	514.283	5.68688	pos	MG(LTE4/0:0/0:0)	HMDB0260480						CYDYAFSODZMADY-VJBFNVCUSA-N	Unclassified	Unclassified	Unclassified	*	51.4	62.5	M+H, M+Na, M+K	C26H43NO7S	0.0973383	7.43573	0.0163069	0.22923	0.876611	1.83606	673186	366648	809894	363750	506484	663115	1.07811e+06	617768	338781	410932	239854	393131	466926	350262
1.09_247.1420n	248.149	1.09353	pos	3-Hydroxybutyrylcarnitine	HMDB0013127					1469900-92-2	UEFRDQSMQXDWTO-BDAKNGLRSA-N	Lipids and lipid-like molecules	Fatty Acyls	Fatty acid esters	***	69.9	87.1	M+H, M+Na	C11H21NO5	0.0821944	7.29934	0.0018896	0.101365	-0.707779	0.612262	389469	636114	295660	486302	358825	378363	339420	478241	475350	516746	693878	793754	715824	621135
2.56_358.0965n	359.104	2.56468	pos	Pantetheine 4'-phosphate	HMDB0001416	398		C01134	115254	2226-71-3	JDMUPRLRUUMCTL-VIFPVBQESA-N	Organic acids and derivatives	Carboxylic acids and derivatives	Amino acids, peptides, and analogues	***	74.6	92.9	M+H, M+Na, M+K	C11H23N2O7PS	0.511999	7.17632	0.0184094	0.23715	0.385942	1.30671	1.25696e+06	961926	1.30541e+06	983291	1.245e+06	1.21589e+06	1.38582e+06	1.40635e+06	844789	1.33403e+06	749476	1.04219e+06	878872	922200
4.81_367.1366m/z	367.137	4.80777	pos	Elafibranor	HMDB0251730						AFLFKFHDSCQHOL-UHFFFAOYSA-N	Phenylpropanoids and polyketides	Linear 1,3-diarylpropanoids	Chalcones and dihydrochalcones	*	45.9	44	M+H-H2O	C22H24O4S	0.963393	6.63078	0.00941665	0.187178	8.54346	373.11	229659	615.525	77035.4	130319	177534	278414	560291	154359	533.438	238.128	320.114	1357.5	446.026	797.944
5.11_343.1401m/z	343.14	5.10693	neg	2-Octenedioic acid	HMDB0000341	5330				5698-50-0	BNTPVRGYUHJFHN-HWKANZROSA-N	Lipids and lipid-like molecules	Fatty Acyls	Fatty acids and conjugates	***	60.1	44.7	2M-H	C8H12O4	0.786911	6.55922	0.0170139	0.232176	6.99773	127.799	235275	1840.98	81296.5	102084	194015	306649	607565	120041	1025.96	794.307	704.668	3114.97	2586.93	2819.05
0.79_470.1439m/z	470.144	0.794483	pos	Normorphine 3-glucuronide	HMDB0255747				14356106		AZRPPLMNKUSBGC-UHFFFAOYSA-N	Alkaloids and derivatives	Morphinans	Unclassified	*	48.9	58.8	M+Na	C22H25NO9	3.93142	6.27541	0.0152814	0.223534	1.47983	2.78917	371355	133142	184220	276004	234287	384451	548273	600895	5912.45	56675.6	79375.1	160744	262118	234027
6.46_330.1680n	329.161	6.45567	neg	Picrocrocin	HMDB0005796				22833654		WMHJCSAICLADIN-VKSCUUAMSA-N	Organic oxygen compounds	Organooxygen compounds	Carbohydrates and carbohydrate conjugates	***	51.4	60.7	M-H, 2M-H	C16H26O7	0.524764	6.12053	0.0165472	0.230175	8.15711	285.452	207457	726.764	108679	154760	529774	239636	198479	13411.3	529.017	608.164	548.418	901.944	405.277	1367.77
1.04_333.0940m/z	333.094	1.04432	neg	(S)-a-Amino-2,5-dihydro-5-oxo-4-isoxazolepropanoic acid N2-glucoside	HMDB0029404	86247			131750866	29790-46-3	OURYTICKCZBKFC-UHFFFAOYSA-N	Organic oxygen compounds	Organooxygen compounds	Carbohydrates and carbohydrate conjugates	***	66.2	73.2	M-H	C12H18N2O9	0.252822	6.0814	0.0284367	0.271843	0.562622	1.47695	759271	514080	612138	865134	731812	773914	739793	832833	493221	279495	389208	554841	454184	913529
0.81_307.0837n	330.073	0.810317	pos	Glutathione	HMDB0000125	44		C00051	124886	70-18-8	RWSXRVCMGQZWBV-WDSKDSINSA-N	Organic acids and derivatives	Carboxylic acids and derivatives	Amino acids, peptides, and analogues	***	72.3	93.5	M+Na, M+K	C10H17N3O6S	-0.47199	6.02105	0.000619664	0.0628675	0.665538	1.58616	446824	281702	410404	333760	450319	433943	540404	512116	272384	326250	226876	260602	288692	315408
0.73_116.0706m/z	116.071	0.731017	pos	D-Proline	HMDB0003411	58150		C00763	8988	344-25-2	ONIBWKKTOPOVIA-SCSAIBSYSA-N	Organic acids and derivatives	Carboxylic acids and derivatives	Amino acids, peptides, and analogues	***	76	96.4	M+H	C5H9NO2	-0.373963	5.84804	0.000315313	0.0465686	-0.318959	0.801648	679754	847946	662078	589618	758210	671588	730899	666128	805808	888843	785797	831163	912346	863717
4.44_344.1472n	343.14	4.44232	neg	(-)-erythro-Anethole glycol 2-glucoside	HMDB0033067	88959			45360332	217973-39-2	JYWSARFDLXXOHT-UHFFFAOYSA-N	Organic oxygen compounds	Organooxygen compounds	Carbohydrates and carbohydrate conjugates	*	49.4	50.2	M-H, 2M-H	C16H24O8	0.261652	5.55146	0.0311247	0.281091	8.18359	290.74	179544	617.542	53939.7	53714.5	120278	234493	510013	104827	503.132	295.984	242.546	1365.96	634.224	663.409
10.20_361.2733m/z	361.273	10.1978	pos	METENEPROST	HMDB0254509				3028542		WMLGLMGSFIXSGO-UHFFFAOYSA-N	Lipids and lipid-like molecules	Fatty Acyls	Fatty acids and conjugates	***	65.7	63.8	M+H-H2O	C23H38O4	-1.04879	5.5012	0.0415221	0.3096	-0.483454	0.715263	504221	704944	511791	586792	631460	505894	327170	462218	875441	874771	651123	828242	449668	550422
0.79_937.2457n	920.242	0.794483	pos	4-Hydroxydecanoyl-CoA	HMDB0300864						FYFAOTOSCVLZCG-UHFFFAOYSA-N	Unclassified	Unclassified	Unclassified	*	38.6	0	M+H-H2O, M+Na	C31H54N7O18P3S	-0.215049	5.46628	0.00134475	0.0886605	0.710219	1.63605	374387	228836	362046	307630	310668	356283	439627	470068	204515	295627	172998	237437	197796	264641
5.68_580.2565m/z	580.256	5.68407	neg	Streptomycin	HMDB0015214	2496		C00413	19649	57-92-1	UCSJYZPVAKXKNQ-HZYVHMACSA-N	Benzenoids	Benzene and substituted derivatives	Diphenylacetonitriles	*	40.7	11	M-H	C21H39N7O12	-3.33926	5.38601	0.0130474	0.211873	0.852547	1.80569	352261	195084	479106	197052	276870	339247	496405	324884	191945	253032	121478	164017	259245	180786
0.68_120.1019m/z	120.102	0.681467	pos	Tetrahydro-2-methyl-3-furanol	HMDB0039799	94348			34742	29848-44-0	ZFVWBUVYNPLIIS-UHFFFAOYSA-N	Organoheterocyclic compounds	Tetrahydrofurans	Unclassified	*	46.9	36.4	M+NH4	C5H10O2	-0.408285	5.37502	0.035288	0.293026	-1.52461	0.347573	104381	300314	137194	124652	135539	93256.6	58779.2	76866.4	591889	388283	399422	206339	151540	64411.8
6.66_225.1246m/z	225.125	6.65527	neg	Amobarbital	HMDB0015440	496		C07536	2164	57-43-2	VIROVYVQCGLCII-UHFFFAOYSA-N	Organoheterocyclic compounds	Diazines	Pyrimidines and pyrimidine derivatives	*	47.3	50	M-H	C11H18N2O3	0.678473	5.28272	0.0482934	0.328143	0.469268	1.38441	688234	497133	540312	534214	475006	748934	938553	892383	499948	507996	506006	477014	588049	403782
0.75_243.0854n	244.093	0.746283	pos	Cytidine	HMDB0000089	3376		C00475	6175	65-46-3	UHDGCWIWMRVCDJ-XVFCMESISA-N	Nucleosides, nucleotides, and analogues	Pyrimidine nucleosides	Unclassified	***	68.5	87.6	M+H, M+Na, M+K	C9H13N3O5	-0.527706	5.2363	0.0106402	0.194634	-0.298686	0.812992	680825	837431	693333	643531	673758	651822	751629	670878	1.01312e+06	810564	858847	904410	755895	681751
1.06_244.0695n	243.062	1.06015	neg	Uridine	HMDB0000296	90		C00299	6029	58-96-8	DRTQHJPVMGBUCF-XVFCMESISA-N	Nucleosides, nucleotides, and analogues	Pyrimidine nucleosides	Unclassified	***	75.1	97	M-H, M+FA-H	C9H12N2O6	-0.339648	5.228	0.0463015	0.323363	0.351889	1.27623	885079	693510	820973	809159	826337	885232	995805	972966	839019	505312	462162	819387	621344	913834
1.11_135.0685n	136.076	1.1094	pos	2-Aminoacetophenone	HMDB0032628	327691			11952	613-89-8	HEQOJEGTZCTHCF-UHFFFAOYSA-N	Organic oxygen compounds	Organooxygen compounds	Carbonyl compounds	*	55.3	85.4	M+H-H2O, M+H	C8H9NO	0.483232	5.09105	0.00102814	0.0786614	-0.374201	0.771532	441841	572680	446846	405613	502117	423286	467054	406131	547303	587672	541879	531224	686203	541797
0.81_243.0622m/z	243.062	0.8104	neg	Pseudouridine	HMDB0000767	5734		C02067	15047	1445-07-4	PTJWIQPHWPFNBW-GBNDHIKLSA-N	Nucleosides, nucleotides, and analogues	Nucleoside and nucleotide analogues	Unclassified	***	75.7	95.1	M-H	C9H12N2O6	-0.155279	5.00444	0.0138696	0.215837	0.521993	1.43594	487676	339622	436546	438184	439027	490747	576483	545069	354569	247233	207206	416302	321007	491414
5.02_345.1558m/z	345.156	5.02187	neg	Nepetaside	HMDB0038149	92890			14020067	114076-56-1	CUIDBUWFCFYEPL-UHFFFAOYSA-N	Lipids and lipid-like molecules	Prenol lipids	Terpene glycosides	*	51.4	61.3	M-H	C16H26O8	0.961736	4.92986	0.0263272	0.264368	5.63539	49.7073	142511	2867	43307.1	63625.5	86503.5	177220	393829	90581	587.777	336.374	377.494	5232.61	5896.11	4771.67
0.63_146.1056n	147.113	0.627433	pos	D-Lysine	HMDB0003405	6919		C00739	57449	923-27-3	KDXKERNSBIXSRK-RXMQYKEDSA-N	Organic acids and derivatives	Carboxylic acids and derivatives	Amino acids, peptides, and analogues	***	75.7	95.4	M+H-H2O, M+H	C6H14N2O2	0.361524	4.84943	0.0110694	0.19748	-0.278035	0.824714	690147	836832	731862	742102	690267	693013	755735	527900	910404	795351	895774	697889	843130	878441
0.75_261.1808m/z	261.181	0.746283	pos	Tiglylcarnitine	HMDB0002366				91825636	64681-36-3	WURBQCVBQNMUQT-OLKPEBQYSA-N	Lipids and lipid-like molecules	Fatty Acyls	Fatty acid esters	**	48	12.9	M+NH4	C12H21NO4	-0.189377	4.7392	4.61668e-06	0.00597984	3.02878	8.16117	108090	13244.4	132091	120144	79654.7	102497	135431	78723.7	4589.48	16833	14416.1	13691	6378.58	23558.4
1.05_132.0245n	150.058	1.04575	pos	3-Methyl sulfolene	HMDB0059667	343032			70941		FAYFWMOSHFCQPG-UHFFFAOYSA-N	Organoheterocyclic compounds	Dihydrothiophenes	Unclassified	*	39.7	3.49	M+H, M+NH4	C5H8O2S	0.23855	4.71092	0.0175468	0.23325	-0.242702	0.845161	787456	931723	898233	693597	925822	733383	784923	688775	1.03448e+06	955403	911161	870344	973577	845376
4.34_312.1212n	357.119	4.34253	neg	Moringyne	HMDB0031724	87896			131751186	97400-73-2	QQHRYSLWMCEKRX-UHFFFAOYSA-N	Organic oxygen compounds	Organooxygen compounds	Carbohydrates and carbohydrate conjugates	*	48.5	46.5	M-H, M+FA-H	C15H20O7	0.938924	4.6778	0.0451361	0.320387	7.27314	154.68	139551	902.19	12159.4	31199.6	37405.1	171140	401821	183579	544.369	578.695	499.237	1571.78	1272.84	946.222
0.72_236.1684m/z	236.168	0.715617	pos	(S)-3-Methylthiohexyl butyrate	HMDB0038946	93557			537755	145937-80-0	CPZRKTMCYSRJPH-UHFFFAOYSA-N	Lipids and lipid-like molecules	Fatty Acyls	Fatty acid esters	*	37	0	M+NH4	C11H22O2S	2.29461	4.49354	0.013166	0.212615	0.68669	1.60959	337166	209474	355114	426825	211633	279677	339029	410717	136144	149485	234131	209038	210658	317386
10.43_1090.5513n	1089.54	10.432	neg	Quinoside A	HMDB0040808	95272			15625674	123597-11-5	UCOFFSFKNNIOHI-UHFFFAOYSA-N	Lipids and lipid-like molecules	Prenol lipids	Terpene glycosides	*	36.3	0.929	M-H, M+FA-H	C53H86O23	-4.28349	4.36244	0.0268722	0.266544	-1.87544	0.272543	47204.2	173199	103044	25290.4	62460.9	48383.3	10067	33979.3	223903	359217	180895	156196	92164.3	26818
0.69_300.0490m/z	300.049	0.69395	neg	N-Acetyl-D-Glucosamine 6-Phosphate	HMDB0001062	5975		C00357	440996	18191-20-3	BRGMHAYQAZFZDJ-RTRLPJTCSA-N	Organic oxygen compounds	Organooxygen compounds	Carbohydrates and carbohydrate conjugates	***	72.6	76.5	M-H	C8H16NO9P	-0.0884467	4.15894	0.00528736	0.15225	0.541808	1.4558	286579	196854	219596	239416	320466	286866	331082	322052	224186	175995	172612	227493	138950	241888
0.79_338.1016m/z	338.102	0.794483	pos	gamma-Glutamylcysteinylserine	HMDB0039733	94285			22723545	144331-30-6	QWHVIVGONDEFNH-UHFFFAOYSA-N	Organic acids and derivatives	Carboxylic acids and derivatives	Amino acids, peptides, and analogues	***	56.2	56.2	M+H	C11H19N3O7S	-0.0531007	4.07974	0.00846582	0.180468	1.58148	2.99277	131558	43958.5	85116.6	69370.2	102190	139776	222816	170077	6900	35494.8	47441.7	16371.3	70000.9	87542.2
12.25_427.1581m/z	427.158	12.2471	neg	Crosatoside B	HMDB0039253				131752590		BMZAMCOQJLZXCY-UHFFFAOYSA-N	Organic oxygen compounds	Organooxygen compounds	Carbohydrates and carbohydrate conjugates	*	37.1	0	M-H2O-H	C20H30O11	-6.34396	4.02611	0.0380794	0.301895	-1.33369	0.396753	69504.2	175183	97100.2	49308.3	76912.1	67279.5	23341.8	103083	228332	214596	282953	236978	50833.6	37402.3
0.79_918.2284m/z	918.228	0.794433	neg	5-Decenoyl-CoA	HMDB0300870						COJZXVHOJVJQAL-UHFFFAOYSA-N	Unclassified	Unclassified	Unclassified	*	38.6	0	M-H	C31H52N7O17P3S	0.338451	3.99224	0.00097518	0.0772563	0.805903	1.74824	175594	100440	150451	159548	144894	176229	247327	175116	107263	119628	79609.7	108188	97556.5	90397.7
5.69_513.2760n	496.273	5.68688	pos	Sulfolithocholylglycine	HMDB0002639	6725	LMST05030004	C11301	72222	15324-64-8	FHXBAFXQVZOILS-OETIFKLTSA-N	Lipids and lipid-like molecules	Steroids and steroid derivatives	Bile acids, alcohols and derivatives	*	53.2	74.2	M+H-H2O, M+NH4	C26H43NO7S	-0.00183422	3.85548	0.0464085	0.323363	0.788541	1.72733	223878	129609	381324	156760	223234	192244	237871	151833	171942	223174	76418.9	106808	111323	87990.1
0.67_146.0692n	145.062	0.674617	neg	L-Glutamine	HMDB0000641	5614		C00064	5961	56-85-9	ZDXPYRJPNDTMRX-VKHMYHEASA-N	Organic acids and derivatives	Carboxylic acids and derivatives	Amino acids, peptides, and analogues	***	70.1	97	M-H, M+FA-H, M-H2O-H	C5H10N2O3	0.437955	3.7781	0.0333635	0.287808	0.779957	1.71708	234890	136796	217361	251793	295507	109664	185384	349633	198101	158250	93870.5	70143	173246	127168
1.04_1071.7654m/z	1071.77	1.04432	neg	TG(22:5(7Z,10Z,13Z,16Z,19Z)/22:5(4Z,7Z,10Z,13Z,16Z)/22:6(4Z,7Z,10Z,13Z,16Z,19Z))	HMDB0055871				131766371		AHKHMUYVSKEIDX-NQTDZTRZSA-N	Lipids and lipid-like molecules	Glycerolipids	Triradylcglycerols	*	37.8	0	M+FA-H	C69H102O6	-0.392157	3.76097	0.00140647	0.0916762	1.14883	2.21734	117837	53143.4	121646	84320.3	108709	152441	155329	84577.4	77909.6	63261	30437.2	40307.7	42110.7	64833.9
1.06_372.1048m/z	372.105	1.06015	neg	PharmaGSID_47330		317802			9865233		PCZLQMGFNUNVOM-UHFFFAOYSA-N	Unclassified	Unclassified	Unclassified	*	36.9	0	M-H2O-H	C21H15F2N5O	-4.62998	3.6169	0.0191171	0.240813	0.327675	1.25499	411944	328245	384428	385053	452123	416964	358894	474205	430445	292824	281068	365629	288774	310733
0.70_163.1157m/z	163.116	0.699383	pos	(S1)-Methoxy-3-heptanethiol	HMDB0032380	88407			12009861	400052-49-5	HRYCNFLXCKVTER-QMMMGPOBSA-N	Organic oxygen compounds	Organooxygen compounds	Ethers	*	37.7	0	M+H	C8H18OS	3.86791	3.61049	0.00169598	0.0967624	-0.436773	0.738785	189002	255827	147368	186662	189331	189596	219310	201743	276922	220715	303218	230351	252704	251055
3.68_298.0970m/z	298.097	3.68173	pos	5'-Methylthioadenosine	HMDB0001173	3425		C00170	439176	2457-80-9	WUUGFSXJNOTRMR-IOSLPCCCSA-N	Nucleosides, nucleotides, and analogues	5'-deoxyribonucleosides	5'-deoxy-5'-thionucleosides	***	76.9	96.6	M+H	C11H15N5O3S	0.596368	3.57797	0.00114188	0.0843218	1.29604	2.45553	105795	43084.4	59722.2	109716	83020.5	110455	128106	143752	25058.2	48384.6	56669.3	29045.1	35785.2	63564.1
4.33_346.1630n	345.156	4.33153	neg	Glucosyl 6-hydroxy-2,6-dimethyl-2E,7-octadienoate	HMDB0035822	91049				191548-38-6	IVWJMPAYYVHQPT-TWGQIWQCSA-N	Organic oxygen compounds	Organooxygen compounds	Carbohydrates and carbohydrate conjugates	***	70.5	66.5	M-H, M+FA-H	C16H26O8	0.675107	3.54032	0.0339821	0.28898	10.0803	1082.64	75110.5	69.3772	20777.8	36127.2	30311.2	87391.8	220153	55901.6	32.1043	4.23678e-05	31.1379	207.448	26.178	119.395
0.79_1071.7660m/z	1071.77	0.794433	neg	(1R,5R,6R,7S)-6-Methyl-1,3,7-tris(3-methylbut-2-enyl)-5-(2-methyl-1-oxopropyl)-6-(4-methylpent-3-enyl)bicyclo[3.3.1]nonane-2,4,9-trione	HMDB0260093				22969135		GQRREYKSPJMLAW-UHFFFAOYSA-N	Lipids and lipid-like molecules	Prenol lipids	Monoterpenoids	*	36.7	0	2M-H	C35H52O4	0.114864	3.46166	0.00261591	0.11482	1.07349	2.10452	112305	53363.8	108868	81875.2	78974.9	116010	174412	113692	57766.8	66445.9	33894.9	60127.9	55607.3	46340.1
10.29_1071.5682m/z	1071.57	10.2856	pos	CDP-DG(PGF1alpha/16:0)	HMDB0290860						CXHYHVLZBBNDAX-WDFLKTBLSA-N	Unclassified	Unclassified	Unclassified	*	40.9	23.7	M+NH4	C48H85N3O18P2	3.83404	3.43415	0.0464986	0.323601	-0.974478	0.508924	80347.9	157878	80848.6	108261	110754	79242.4	36522.9	66457.7	133090	236092	134273	271519	68059.1	104235
0.78_192.0325m/z	192.032	0.77895	pos	2,4-Thiazolidinedicarboxylic acid, 2-methyl-	HMDB0244750				98342		JCAKCGQZNBEITC-UHFFFAOYSA-N	Organic acids and derivatives	Carboxylic acids and derivatives	Amino acids, peptides, and analogues	***	64.5	44.8	M+H	C6H9NO4S	-0.0923213	3.39368	0.0215362	0.250279	0.612994	1.52943	213561	139634	195464	174175	186720	214622	225233	285153	52385.9	145252	99116.4	179599	176960	184494
0.75_457.1683m/z	457.168	0.746283	pos	(S)-4-(4-((2-(3,5-Dimethylphenyl)pyrrolidin-1-yl)Methyl)phenoxy)-3-fluorobenzaMide	HMDB0244422				44256416		ZHPMYDSXGRRERG-UHFFFAOYSA-N	Benzenoids	Benzene and substituted derivatives	Diphenylethers	*	38.3	5.39	M+K	C26H27FN2O2	-1.29865	3.33021	0.0158098	0.227486	-0.572875	0.672276	141500	210480	131013	165745	129791	144817	192706	84929.4	164293	213699	158193	214525	231172	280997
3.92_372.2387m/z	372.239	3.92275	pos	10-Hydroxydodecanedioylcarnitine	HMDB0241287						JKFXDDFOIMQMJJ-UHFFFAOYSA-N	Lipids and lipid-like molecules	Fatty Acyls	Fatty acid esters	*	43	19.1	M+H-H2O	C19H35NO7	1.68824	3.29907	0.00906855	0.184756	-1.32514	0.39911	38083.2	95420.4	35218.2	84664.2	29914.8	37537.2	39565.2	1599.55	84116.9	45538.8	130283	111854	129886	70843.1
5.11_411.1276m/z	411.128	5.10693	neg	Methylpicraquassioside A	HMDB0038347	93067					YCIAHAYEVBEGKT-UHFFFAOYSA-N	Organic oxygen compounds	Organooxygen compounds	Carbohydrates and carbohydrate conjugates	**	48.7	0	M-H	C19H24O10	-5.00046	3.28753	0.016184	0.228578	6.414	85.272	58996.5	691.863	20071.9	24522.5	51047.8	78011.2	149997	30328.8	34.7835	4.23678e-05	36.2121	1344.49	1523.68	1212.01
0.81_290.0751n	289.068	0.8104	neg	Glutamic acid glutamate	HMDB0252808						IWJFFRXLMNLEMO-UHFFFAOYSA-N	Organic acids and derivatives	Carboxylic acids and derivatives	Tetracarboxylic acids and derivatives	*	41.8	11.4	M-H2O-H, M-H	C10H14N2O8	0.311293	3.28717	0.0138085	0.215676	0.517563	1.43153	212419	148386	191840	189129	192207	210049	249699	241591	155412	108075	91668.1	181773	140481	212905
0.81_576.1718m/z	576.172	0.810317	pos	Cartormin	HMDB0035209	90527			131751684		DDYOBOBXPBUGTA-ZZXKWVIFSA-N	Lipids and lipid-like molecules	Prenol lipids	Terpene lactones	*	37.5	0	M+H	C27H29NO13	1.05542	3.24087	0.00660153	0.166623	1.33323	2.51966	94335.8	37439.9	56796	70200	60742.1	105962	148021	124294	19295.9	25002.3	25479.1	47019.3	50065.5	57777.3
1.04_337.0444m/z	337.044	1.04432	neg	Imidazoleacetic acid ribotide	HMDB0006032	58346		C04437	16019958	2888-19-9	RDQUQBHPMYFYMX-XIWVQZPPSA-N	Nucleosides, nucleotides, and analogues	Purine nucleosides	Unclassified	*	42.2	14.2	M-H	C10H15N2O9P	0.398846	3.1558	0.0473108	0.325974	1.17605	2.25957	114260	50567.3	60478.8	70568	99149.6	136300	171471	147594	44211.7	17571.1	19184.8	23474.9	43444.5	155517
4.27_343.1401m/z	343.14	4.26695	neg	3,7,8,15-Scirpenetetrol	HMDB0037560	92417			14587765	128534-67-8	QNKGXSIDHDDDHD-UHFFFAOYSA-N	Lipids and lipid-like molecules	Prenol lipids	Sesquiterpenoids	*	52.1	64.4	M+FA-H	C15H22O6	0.892101	3.14293	0.0401264	0.306366	8.86603	466.596	60145.1	128.902	14845.6	16957.7	30946.9	68399.3	180503	49218.6	91.6216	70.1188	61.7622	250.214	101.829	197.867
10.73_368.3522m/z	368.352	10.7292	pos	20:2(5Z,9Z)(11Me,15Me,19Me)		102887	LMPR0103010018		52929812		GAAXOKKROCNDSI-UBAIFNMZSA-N	Lipids and lipid-like molecules	Prenol lipids	Isoprenoids	*	39.4	0.497	M+NH4	C23H42O2	-0.189596	3.10937	0.0304302	0.279099	1.16075	2.23574	125471	56120.5	71305.2	110190	97514.7	136788	94147.1	242880	28585.2	63753.3	34507.4	106560	48154.5	55162.3
5.82_233.0855m/z	233.085	5.82337	neg	1-Butyl-3-(pyridine-4-carbonylamino)thiourea	HMDB0247351	426222			305005		OOCYXICFMNIYAZ-UHFFFAOYSA-N	Organoheterocyclic compounds	Pyridines and derivatives	Pyridinecarboxylic acids and derivatives	*	37.4	0	M-H2O-H	C11H16N4OS	-4.70162	3.06446	0.0231698	0.255041	9.04325	527.582	57209.7	108.438	118450	52814.1	119924	45242.7	4954.4	1873.36	98.3877	125.249	198.561	67.9888	41.3648	119.073
12.51_621.3332m/z	621.333	12.5054	pos	3,4-Diketo-2',3'-dihydroxy-2-nor-beta-carotene			LMPR01070870		87442972		QETNDFHTWWPCMT-PONOSZKISA-N	Lipids and lipid-like molecules	Prenol lipids	Isoprenoids	*	53	79.1	M+K	C39H50O4	-1.45354	3.06032	0.000939375	0.0766444	1.47524	2.7803	73341.8	26379.1	99418.3	53106.1	67071.6	67821.8	54127.6	98505.4	11456.4	11458.2	25686.5	30144.9	32363.8	47164.6
4.72_479.1151m/z	479.115	4.72455	neg	Sivelestat	HMDB0258320	320535			107706		BTGNGJJLZOIYID-UHFFFAOYSA-N	Benzenoids	Benzene and substituted derivatives	Benzoic acids and derivatives	*	37	0.00394	M+FA-H	C20H22N2O7S	4.96573	3.05362	0.0242398	0.258991	10.303	1263.31	52886.1	41.8629	12398.9	16949.8	35972.9	70205.9	143372	38416.9	4.23678e-05	0.012345	45.7871	90.4354	61.2562	53.6865
0.84_295.0663m/z	295.066	0.84175	pos	Pyridine N-oxide glucuronide	HMDB0061177				131770061		KITHDEVLYXWSPB-ZBGLXGBJSA-O	Organic oxygen compounds	Organooxygen compounds	Carbohydrates and carbohydrate conjugates	*	47.1	40.7	M+Na	C11H14NO7+	0.31715	3.04211	0.0327168	0.285828	-0.908746	0.532648	70995.9	133289	82461	80484.4	83113.6	67953.6	48612.2	63350.6	193714	195904	164280	99376.3	97116.5	49341.1
9.78_467.3012n	468.309	9.77907	pos	PC(0:0/14:0)		40339	LMGP01050073		24779490		IGZPHNNYPPAPLA-OAQYLSRUSA-N	Lipids and lipid-like molecules	Glycerophospholipids	Glycerophosphocholines	***	68.2	72.9	M+H, M+Na	C22H46NO7P	0.0788429	3.03178	0.000347831	0.0488955	0.886379	1.84853	92208.5	49882	88803.4	70830.1	112140	98227.6	80539.6	102711	38991	58689	54878.3	64184.4	31494.1	51055.5
4.86_368.1450n	369.152	4.86035	pos	4-Hydroxy-3-prenylbenzoic acid glucoside	HMDB0039891	94435					ZTHSABILDCCHJR-UHFFFAOYSA-N	Organic oxygen compounds	Organooxygen compounds	Carbohydrates and carbohydrate conjugates	**	57.6	0	M+H, M+Na	C18H24O8	-5.87958	3.01229	0.0296156	0.27709	8.63334	397.096	53295	134.212	15128.3	28476.3	25956.5	64622.7	152477	33109.1	80.0228	56.0283	43.6638	364.478	160.64	100.44
0.63_130.0863m/z	130.086	0.627433	pos	(1r,2s)-2-Aminocyclopentanecarboxylic acid	HMDB0242326				429614		JWYOAMOZLZXDER-UHFFFAOYSA-N	Organic acids and derivatives	Carboxylic acids and derivatives	Amino acids, peptides, and analogues	***	62.7	50.5	M+H	C6H11NO2	0.440173	2.97821	0.0135252	0.214084	-0.270437	0.829068	275346	332116	291170	298089	274898	274185	303226	210511	357753	316735	355104	276832	330331	355939
11.66_410.2372m/z	410.237	11.6591	neg	N-arachidonoyl taurine		44906	LMFA08020075		42607331		YUNYSWCRLRYOPO-DOFZRALJSA-N	Lipids and lipid-like molecules	Fatty Acyls	Fatty amides	*	39.7	7.45	M-H	C22H37NO4S	0.39173	2.89987	0.0312755	0.281491	-1.33507	0.396373	33754.1	85157.6	23491.8	42117.5	36421.8	36770.1	24917	38806.7	55433.7	26435.7	159753	82478.1	127449	59395.5
11.30_922.5791m/z	922.579	11.3022	neg	PE(DiMe(13,5)/20:3(5Z,11Z,14Z)-O(8,9))	HMDB0284858						AMZLUKMPIORVRI-LMKNVAIPSA-N	Unclassified	Unclassified	Unclassified	*	37.3	0	M+FA-H	C49H84NO10P	-2.6882	2.89892	0.0344424	0.290359	0.41752	1.33563	217447	162805	210886	219929	187852	225294	240113	220605	128402	152163	214171	204287	81231.8	196572
0.75_112.0505m/z	112.05	0.746283	pos	Cytosine	HMDB0000630	283		C00380	597	71-30-7	OPTASPLRGRRNAP-UHFFFAOYSA-N	Organoheterocyclic compounds	Diazines	Pyrimidines and pyrimidine derivatives	***	67.8	71.2	M+H	C4H5N3O	-0.64162	2.88312	0.00328695	0.125534	-0.318557	0.801871	173749	216679	179126	153759	172772	171964	184521	180352	251962	208648	218280	233846	209479	177861
5.69_558.2471m/z	558.247	5.68688	pos	ibho#22			LMFA13040144		86289900		FUIIPNLIVZGYJM-RHENGWIESA-N	Lipids and lipid-like molecules	Fatty Acyls	Fatty acyl glycosides	*	46.4	37.2	M+K	C28H41NO8	1.46455	2.8801	0.0136018	0.214603	0.759385	1.69277	109578	64733.1	144927	63837.6	91855.6	105668	155644	95536.9	65592.5	79363.5	43779.5	64952.2	74284.9	60426.1
11.27_522.2840m/z	522.284	11.2698	neg	LysoPS(18:1(9Z)/0:0)	HMDB0240603	40829	LMGP03050001		9547099	89319-60-8	JZWNYZVVZXZRRH-YFKVPUFHSA-N	Lipids and lipid-like molecules	Glycerophospholipids	Glycerophosphoserines	***	70.4	96.7	M-H	C24H46NO9P	0.489833	2.86325	0.0310183	0.280656	-0.922652	0.527538	59535.6	112856	95216.8	52488.3	72235.4	57457.4	34366.4	45449.7	140629	164661	127111	134062	71364.9	39305.8
4.71_389.1185m/z	389.118	4.71275	pos	Salicyluric beta-D-glucuronide	HMDB0240252				121596205		OEPADIDIUZTYOX-QKZHPOIUSA-N	Organic oxygen compounds	Organooxygen compounds	Carbohydrates and carbohydrate conjugates	*	41.5	12.3	M+NH4	C15H17NO10	-1.65862	2.86193	0.0064424	0.164479	10.0343	1048.67	41544.8	39.6166	13542	21567.5	32481.5	55555.9	94731.8	31390.1	26.3784	4.23678e-05	4.23678e-05	143.507	4.23678e-05	67.8138
1.11_123.0442m/z	123.044	1.1094	pos	4-Hydroxybenzaldehyde	HMDB0011718	335656		C00633	126	123-08-0	RGHHSNMVTDWUBI-UHFFFAOYSA-N	Organic oxygen compounds	Organooxygen compounds	Carbonyl compounds	*	53.7	70.5	M+H	C7H6O2	1.28817	2.85196	0.00107863	0.0814561	-0.39441	0.760801	131439	172765	135462	119041	150051	126262	138522	119299	164927	179196	163242	157971	208036	163215
1.05_338.1018m/z	338.102	1.04575	pos	S-Hydroxymethylglutathione	HMDB0004662	7068		C14180	447123	32260-87-0	PIUSLWSYOYFRFR-BQBZGAKWSA-N	Organic acids and derivatives	Carboxylic acids and derivatives	Amino acids, peptides, and analogues	***	66.2	69.8	M+H	C11H19N3O7S	0.478416	2.84235	0.0077502	0.178354	1.79426	3.46839	58256.3	16796.4	44142	35555.7	49995.9	52122.9	110516	57204.8	4.23678e-05	10381.7	24549	1305.26	28795	35747.2
10.41_366.3365m/z	366.336	10.4142	pos	(E,E)-3,7,11-Trimethyl-2,6,10-dodecatrienyl octanoate		97253	LMFA07010547		5352773		HHSVAJNBWYMLPB-QMEDZHDISA-N	Lipids and lipid-like molecules	Fatty Acyls	Fatty esters	*	53.2	70.6	M+NH4	C23H40O2	-0.58379	2.80046	0.0326731	0.285828	1.03021	2.04232	113351	55501.2	79659.4	113731	100867	121173	67373.2	197302	23054.8	84491.5	23666.7	107277	54918.3	39599
0.68_399.1443m/z	399.144	0.681467	pos	S-Adenosylmethionine		3289		C00019	34755	29908-03-0	MEFKEPWMEQBLKI-AIRLBKTGSA-N	Unclassified	Unclassified	Unclassified	*	50.2	63.3	M+H	C15H22N6O5S	-0.533548	2.79682	0.00147379	0.0930512	1.32932	2.51284	62015.6	24679.5	38373.3	46640	57253.9	65516.2	79702.9	84607.4	17385.5	29613.1	32985.7	15594	13288	39210.8
0.79_468.1294m/z	468.129	0.794433	neg	Oxaprozin glucuronide	HMDB0255967						ZONKPOICDFFRNF-UHFFFAOYSA-N	Organic oxygen compounds	Organooxygen compounds	Carbohydrates and carbohydrate conjugates	*	43.1	27.9	M-H	C24H23NO9	-1.26892	2.79544	0.0105037	0.194219	1.4141	2.66494	72335.6	27143.4	44609.1	55102.1	47686.7	77176.9	105247	104191	884.487	13645	20453.3	25575.2	64311.4	37990.9
0.79_271.1325n	310.096	0.794483	pos	(R)-N-(Quinuclidin-3-yl)furo(2,3-C)pyridine-5-carboxamide	HMDB0256381				16725588		IPKZCLGGYKRDES-UHFFFAOYSA-N	Organoheterocyclic compounds	Pyridines and derivatives	Pyridinecarboxylic acids and derivatives	*	36.9	0	M+H-H2O, M+K	C15H17N3O2	1.54384	2.75206	0.0390221	0.304951	0.35867	1.28224	206811	161288	186816	164174	192930	203000	273828	220116	146501	205279	123051	153008	162698	177191
4.85_479.1151m/z	479.115	4.8452	neg	Verproside	HMDB0259794				495172		DBUOUVZMYWYRRI-UHFFFAOYSA-N	Organic oxygen compounds	Organooxygen compounds	Carbohydrates and carbohydrate conjugates	**	40.2	0	M-H2O-H	C22H26O13	-8.76319	2.69614	0.00504523	0.149677	29.6721	8.55455e+08	36243.8	4.23678e-05	15533.4	25142.8	28315.2	45620.1	82391.9	20459.2	4.23678e-05	4.23678e-05	4.23678e-05	4.23678e-05	4.23678e-05	4.23678e-05
4.60_328.2123m/z	328.212	4.59843	pos	3-Methylnonanedioylcarnitine	HMDB0240795						FIIIQFKVGGXMNO-UHFFFAOYSA-N	Lipids and lipid-like molecules	Fatty Acyls	Fatty acid esters	*	51.8	64.7	M+H-H2O	C17H31NO6	1.20954	2.65027	3.41116e-05	0.0153076	3.63603	12.4324	32791	2637.56	19521.3	27881.7	29859.3	34841	50954.6	33688.4	3088.02	2652.06	2879.08	2861.16	2908.06	1436.96
0.79_250.0623n	233.059	0.794483	pos	gamma-Glutamylcysteine	HMDB0001049	5966		C00669	123938	636-58-8	RITKHVBHSGLULN-WHFBIAKZSA-N	Organic acids and derivatives	Carboxylic acids and derivatives	Amino acids, peptides, and analogues	***	63.2	41.7	M+H-H2O, M+H	C8H14N2O5S	-0.367199	2.6147	0.000820792	0.0712014	0.922515	1.89542	67122	35412.8	56947.1	53321.6	57994	66633.1	94845.3	72991.1	29854.9	39711.2	27961.6	36865.6	34454.9	43628.8
12.20_540.3600n	585.358	12.1984	neg	1alpha,25-dihydroxy-25,25-diphenyl-26,27-dinorvitamin D3 / 1alpha,25-dihydroxy-25,25-diphenyl-26,27-dinorcholecalciferol			LMST03020543		9547646		OXXBKFFJWAXMCY-CORMLKSPSA-N	Lipids and lipid-like molecules	Steroids and steroid derivatives	Secosteroids	*	38.5	2.51	M-H, M+FA-H	C37H48O3	-0.719054	2.60571	0.00148457	0.0930512	0.972665	1.96246	72136.2	36758	99036.3	79188.9	72019.6	57389.5	57576.1	67606.8	27891.4	27281	37656.8	55062.1	24650.7	48006.1
12.03_537.5124n	538.52	12.0345	pos	Arginine-betaxanthin	HMDB0304647						CNOVLYHRDNYVLT-DRRKUCBYSA-N	Organic oxygen compounds	Organooxygen compounds	Alcohols and polyols	*	38.7	0	M+H-H2O, M+H	C34H67NO3	0.506587	2.58574	0.027299	0.268786	-0.525093	0.694914	102786	147911	110089	78943.3	98059.4	102140	104104	123379	167495	153768	94267.9	118321	143280	210337
6.21_505.1721m/z	505.172	6.21312	neg	Eruberin A			LMPK12020167		44257136		BVWNFYIRLQDZHV-AGPJMPNYSA-N	Lipids and lipid-like molecules	Polyketides	Flavonoids	*	43.7	22.7	M+FA-H	C24H28O9	1.13591	2.56689	0.00119606	0.0862374	29.4588	7.37898e+08	31263.1	4.23678e-05	57832.2	26298.6	24833.7	26071.3	43854.2	8688.7	4.23678e-05	4.23678e-05	4.23678e-05	4.23678e-05	4.23678e-05	4.23678e-05
2.56_448.0660n	447.059	2.56463	neg	Ellagic acid 2-rhamnoside	HMDB0303358				67126095		NLOYJHDXNPMFKW-UHFFFAOYSA-N	Phenylpropanoids and polyketides	Tannins	Hydrolyzable tannins	*	42.3	25	M-H, M+FA-H, 2M-H	C20H16O12	3.97738	2.4858	0.0113174	0.198715	0.342875	1.26828	168050	132502	178757	149784	162027	170853	159407	187470	115761	176231	108798	140919	134253	119048
0.76_134.0270m/z	134.027	0.761983	pos	Thiazolidine-4-carboxylic acid	HMDB0258979						DZLNHFMRPBPULJ-UHFFFAOYSA-N	Organic acids and derivatives	Carboxylic acids and derivatives	Amino acids, peptides, and analogues	**	60.7	25	M+H	C4H7NO2S	-0.18616	2.48562	0.0210463	0.248428	0.483883	1.3985	120180	85935	122412	92569.5	141868	117863	118017	128353	117306	99455.4	107257	54641.5	58948.8	78000.8
10.90_548.2985m/z	548.298	10.8997	pos	1-(2-methoxy-6Z-heptadecenyl)-sn-glycero-3-phosphoserine			LMGP03060015		137323951		VRCJKDPTMPAFIX-PFIUAXAOSA-N	Lipids and lipid-like molecules	Glycerophospholipids	Glycerophosphoserines	*	52.4	69.8	M+Na	C24H48NO9P	4.95629	2.47488	0.0394589	0.30603	-0.861957	0.550206	51229	93108.8	83786.4	49332.8	56766.7	43262.6	29028.8	45196.3	111672	153605	95793.5	95102.8	60742.4	41737.2
6.65_228.1360n	251.125	6.65185	pos	(-)-12-hydroxy-9,10-dihydrojasmonic acid		45945	LMFA02020015		10082491		SXFKEAKOXUOQGN-NXEZZACHSA-N	Lipids and lipid-like molecules	Fatty Acyls	Octadecanoids	*	48.5	45.8	M+H, M+Na, M+NH4, M+H-H2O	C12H20O4	-0.623854	2.43071	0.00311283	0.122311	-0.818368	0.567083	40695.1	71762.1	33142.9	51118	50966.8	42967.8	33130.7	32844.3	90516.6	63923.7	96743.1	64380.3	53001.7	62007.3
4.71_169.1224m/z	169.122	4.71275	pos	(1S,4R)-1-Hydroxy-2-oxolimonene		330420	LMPR0102090042	C11937	443522		JEQLRDRDFLXSHY-SCZZXKLOSA-N	Lipids and lipid-like molecules	Prenol lipids	Isoprenoids	*	46.2	34.4	M+H	C10H16O2	0.748682	2.41789	0.0141758	0.216972	3.90812	15.0128	33671.8	2242.87	10622.5	14924.9	26512.6	42366.8	81652.5	25951.8	2063.66	1996.72	2488.81	2312.44	1994.26	2601.36
0.79_482.1088m/z	482.109	0.794433	neg	Isavuconazole	HMDB0253593				21937662		DDFOUSQFMYRUQK-UHFFFAOYSA-N	Benzenoids	Benzene and substituted derivatives	Phenylpropanes	*	36.2	0	M+FA-H	C22H17F2N5OS	-3.63083	2.40219	0.000129969	0.0294449	1.01072	2.01492	51085.7	25353.8	44388.9	42002.3	42237	52011	63420.4	62454.4	25322.3	25079.2	22973.3	23610.8	22929.8	32207.3
10.93_522.2840m/z	522.284	10.9284	neg	1-Oleoylglycerophosphoserine	HMDB0061694				85036846		JZWNYZVVZXZRRH-UHFFFAOYSA-N	Lipids and lipid-like molecules	Glycerophospholipids	Glycerophosphoserines	***	58.3	92.8	M-H	C24H46NO9P	0.508982	2.39601	0.0411996	0.309304	-0.713631	0.609783	58057.7	95210.4	74395.6	67745	79263.8	57194.4	27722.9	42024.5	94020.6	116654	110889	137495	58001.7	54201.8
4.72_547.1027m/z	547.103	4.72455	neg	Ginkgetin	HMDB0033762	43573	LMPK12040003	C10048	5271805	481-46-9	AIFCFBUSLAEIBR-UHFFFAOYSA-N	Phenylpropanoids and polyketides	Flavonoids	Biflavonoids and polyflavonoids	*	36.7	0	M-H2O-H	C32H22O10	-1.24816	2.39524	0.0234699	0.255324	11.286	2496.97	32410.7	12.98	7654.17	9662.69	22185	43399.8	87142.9	24419.9	4.23678e-05	4.23678e-05	4.23678e-05	77.8799	4.23678e-05	4.23678e-05
6.31_525.1440m/z	525.144	6.31167	neg	Estriol 3-sulfate 16-glucuronide			LMST05010047		44263369		ATNWFRGUDKUYOG-JRSYHJKYSA-N	Lipids and lipid-like molecules	Steroids and steroid derivatives	Steroid conjugates	*	50.1	63	M-H2O-H	C24H32O12S	0.759908	2.37472	0.00156913	0.0932459	29.2365	6.32495e+08	26797.4	4.23678e-05	17743.5	13864	16143.4	29392.4	54972.3	28668.8	4.23678e-05	4.23678e-05	4.23678e-05	4.23678e-05	4.23678e-05	4.23678e-05
0.73_323.0287m/z	323.029	0.725633	neg	Uridine 5'-monophosphate	HMDB0000288			C00105	6030	58-97-9	DJJCXFVJDGTHFX-XVFCMESISA-N	Nucleosides, nucleotides, and analogues	Pyrimidine nucleotides	Pyrimidine ribonucleotides	**	51.8	0	M-H	C9H13N2O9P	0.303296	2.37395	0.00502552	0.14958	1.30917	2.47798	47441.7	19145.3	38795	22358	40972.5	48972	70731.8	62821	11126	24111.8	21762.5	18727	8336.63	30807.9
5.19_242.0804n	243.088	5.19125	pos	Lumichrome	HMDB0254199	64742		C01727	506	1086-80-2	ZJTJUVIJVLLGSP-UHFFFAOYSA-N	Organoheterocyclic compounds	Pteridines and derivatives	Alloxazines and isoalloxazines	***	64.8	72.4	M+H, M+Na	C12H10N4O2	0.0628868	2.36223	0.0194695	0.242563	-0.329755	0.795672	127944	160800	134637	118386	113727	117302	140471	143141	130848	158460	143160	196754	148441	187135
4.09_233.1266n	256.116	4.09482	pos	4-[(2,4-Dihydroxy-3,3-dimethylbutanoyl)amino]butanoic acid	HMDB0246316				2527		SBBDHANTMHIRGW-UHFFFAOYSA-N	Organic acids and derivatives	Carboxylic acids and derivatives	Amino acids, peptides, and analogues	***	59.6	51.5	M+Na, M+K, M+H	C10H19NO5	1.35107	2.32968	0.0293059	0.275747	0.983989	1.97793	65232	32980	45317.6	38262.1	123318	70973.5	50708.8	62812	34730.4	32447.3	32596.8	30488.1	27733.5	39883.8
6.26_681.3107m/z	681.311	6.25955	neg	L-Prolinamide,D-tyrosyl-L-arginylglycyl-4-nitro-L-phenylalanyl-	HMDB0247954				14060837		KCFHMBXKJQJYFK-UHFFFAOYSA-N	Lipids and lipid-like molecules	Steroids and steroid derivatives	Steroid lactones	*	38.9	0	M-H	C31H42N10O8	-1.03232	2.32068	0.0356137	0.293552	29.4702	7.43711e+08	31509.4	4.23678e-05	8512.74	13531.2	84154.4	29650.5	52873.7	333.995	4.23678e-05	4.23678e-05	4.23678e-05	4.23678e-05	4.23678e-05	4.23678e-05
1.04_581.1142m/z	581.114	1.04432	neg	2',3'-Dideoxycytidine-5'-monophosphate	HMDB0244310				355449		RAJMXAZJKUGYGW-UHFFFAOYSA-N	Organoheterocyclic compounds	Diazines	Pyrimidines and pyrimidine derivatives	*	37.5	0	2M-H	C9H14N3O6P	-4.40422	2.26409	0.0254081	0.261961	1.57358	2.97643	45131.5	15163	24423.8	25557.4	39085.2	53603	71759	56360.7	8484.57	3493.72	3388.4	6898.37	11638.1	57074.8
1.77_349.0945n	350.102	1.7713	pos	S-(Formylmethyl)glutathione	HMDB0060507	70375		C14871	11954074		VKLQBAQSSOPXGF-YUMQZZPRSA-N	Organic acids and derivatives	Carboxylic acids and derivatives	Amino acids, peptides, and analogues	***	59.1	72.2	M+H, M+Na	C12H19N3O7S	0.313446	2.23371	0.00398421	0.136723	1.25143	2.38078	43847.2	18417.2	43863.8	22832.2	32756.1	42326.5	64731.5	56573.2	10760.9	21854.4	9205.81	23136.7	19425.1	26120.2
10.03_398.3265m/z	398.326	10.0297	pos	trans-Hexadec-2-enoyl carnitine	HMDB0006317	58388	LMFA07070109		53477817		SOYNLLDADLOGAM-ISLYRVAYSA-N	Lipids and lipid-like molecules	Fatty Acyls	Fatty acid esters	***	73.7	87.6	M+H	C23H43NO4	-0.00332796	2.23164	0.0115303	0.200491	0.76918	1.7043	67982.5	39888.8	72620.5	62342.9	64402.6	68419.4	64805.7	75303.8	21165.8	21964.4	52862.8	27430.5	39129.2	76780
6.66_293.1121m/z	293.112	6.65527	neg	Bromelains	HMDB0304826	66640		C07423	5982	57-33-0	QGMRQYFBGABWDR-UHFFFAOYSA-M	Organoheterocyclic compounds	Diazines	Pyrimidines and pyrimidine derivatives	*	39.7	0	M+FA-H	C11H17N2NaO3	0.822647	2.20083	0.0182789	0.236419	0.380077	1.30141	126033	96843.7	108934	111329	96191.3	146060	150200	143486	96678	94597.5	104077	92592.4	111699	81418.4
2.92_383.1079n	384.115	2.91842	pos	N6-Succinyl Adenosine	HMDB0255303				14803430		VKGZCEJTCKHMRL-UHFFFAOYSA-N	Organic acids and derivatives	Carboxylic acids and derivatives	Dicarboxylic acids and derivatives	***	65.6	63.7	M+H, M+Na	C14H17N5O8	0.555396	2.18048	0.0399184	0.30603	-0.463075	0.725439	77438.8	106748	63310.7	97287.1	86687.9	76843.1	74260.9	66243	72039.3	89560	87376.5	132440	140400	118670
5.02_413.1434m/z	413.143	5.02187	neg	Methyl (R)-9-hydroxy-10-undecene-5,7-diynoate glucoside	HMDB0040895	95348			131752976	152141-44-1	XCRGUWJZEOHKGC-UHFFFAOYSA-N	Lipids and lipid-like molecules	Fatty Acyls	Fatty acyl glycosides	**	43	0	M+FA-H	C18H24O8	-5.09269	2.17572	0.0358122	0.294073	7.90408	239.533	28327.6	118.262	7194.47	10606.2	15227.4	36480	82667.7	17789.7	4.23678e-05	4.0195	5.51147	351.303	279.56	69.1761
9.76_385.2018m/z	385.202	9.75588	neg	14beta,15beta-epoxy-3beta,5beta-dihydroxy-19-norbufa-20,22-dienolide			LMST01130071				DVMQYYDEAYYJOG-UBUFQIOTSA-N	Lipids and lipid-like molecules	Steroids and steroid derivatives	Sterols	*	46.7	40.4	M-H	C23H30O5	-0.565016	2.17106	0.0095249	0.187564	2.51958	5.73415	32908.9	5739.11	41434.5	54311.1	54230.3	29948.9	10196.3	7332.52	5353.15	5103.17	5982.74	5445.8	6482.47	6067.33
1.11_136.0525n	119.049	1.1094	pos	Oxonol	HMDB0256000						FPJNARSNQQWPEX-KZPCVFJPSA-N	Unclassified	Unclassified	Unclassified	*	41.6	12.5	M+H-H2O, M+H	C8H8O2	0.210378	2.16371	0.000556135	0.0615043	-0.404667	0.755411	71354.6	94458.1	73625.5	65601.5	83723.9	67564.6	73548.2	64064.1	92369.9	98683.2	91092.6	87072.6	110118	87412.3
0.79_959.2281n	940.21	0.794433	neg	3-oxo-6Z,9Z-dodecatrienoyl-CoA			LMFA07050464				DFTQFOYBHUUHMQ-GEKZHSOESA-N	Lipids and lipid-like molecules	Fatty Acyls	Fatty esters	*	38.2	0	M-H2O-H, M-H	C33H52N7O18P3S	-2.24629	2.15264	0.0298105	0.277343	0.196966	1.14629	219331	191340	208392	191045	230132	236248	225785	224383	230566	191611	190747	188986	178819	167313
4.16_345.1558m/z	345.156	4.16078	neg	(1R,3S,4S,6R)-6,9-Dihydroxyfenchone 6-O-b-D-glucoside	HMDB0033222	89089			85160606	217960-73-1	QZAWDTYMSDWVFW-UHFFFAOYSA-N	Lipids and lipid-like molecules	Prenol lipids	Terpene glycosides	***	60.7	48.6	M-H	C16H26O8	0.909097	2.14863	0.011421	0.199627	8.49981	361.99	24754	68.3832	7678.88	16557.7	14418.5	30412	61718.8	17738.3	94.7419	27.7496	48.531	134.056	4.23678e-05	105.221
0.75_472.1741n	473.181	0.746283	pos	Lupinisoflavone N		47791	LMPK12050284		14728999		VWJDUNSQXRTRSD-UHFFFAOYSA-N	Lipids and lipid-like molecules	Polyketides	Flavonoids	*	36.2	0	M+H, M+Na	C25H28O9	1.7216	2.14576	0.00421926	0.140624	-0.528282	0.69338	58760.4	84744.8	71748.6	53908.7	55332.8	60689.1	73587.7	37295.3	84797.4	101007	68580.6	91500.9	79164.7	83418.5
9.93_446.3262m/z	446.326	9.93348	pos	Linoleyl carnitine	HMDB0006469						MJLXQSQYKZWZCB-DQFWFXSYSA-O	Lipids and lipid-like molecules	Fatty Acyls	Fatty acid esters	**	40.2	0.472	M+Na	C25H45NO4	5.05361	2.14568	0.00769851	0.177826	1.71426	3.28128	36533.3	11133.9	36676	44489	64393.8	37318.7	13705.6	22616.5	5902.64	7017.74	11953.6	5591.79	14828.8	21508.5
5.11_479.1152m/z	479.115	5.10693	neg	Dihydrogenistin	HMDB0039935				21941294		HZFUHKPAKUYSOB-UHFFFAOYSA-N	Phenylpropanoids and polyketides	Isoflavonoids	Isoflavonoid O-glycosides	**	52.2	0	M+FA-H	C21H22O10	-9.8957	2.14296	0.0156259	0.226086	5.90977	60.1197	25115.9	417.764	8598.64	10702.1	22133.8	33382.1	63206.6	12672	76.5905	67.1854	51.9421	872.9	974.985	462.982
7.39_351.2181m/z	351.218	7.38643	neg	6,15-Diketo-13,14-dihydro-PGF1alpha	HMDB0247162				4596253		KBHLXKOKUVJZIS-UHFFFAOYSA-N	Lipids and lipid-like molecules	Fatty Acyls	Eicosanoids	***	63.3	61.9	M-H2O-H	C20H34O6	0.995867	2.13119	0.00980666	0.189537	-1.07334	0.475218	23519.2	49491.3	26215.9	21712.8	17112.1	21933.1	31803.8	22337.5	60107.6	47882.1	73899.9	36863.2	58965.4	19229.7
1.05_158.1176m/z	158.118	1.04575	pos	N-(3-Hydroxypropyl)valine	HMDB0255001				43468391		LPXDRBWCBNPDTJ-UHFFFAOYSA-N	Organic acids and derivatives	Carboxylic acids and derivatives	Amino acids, peptides, and analogues	**	49.7	0	M+H-H2O	C8H17NO3	0.401265	2.12982	0.00287045	0.117514	1.27686	2.42311	38925	16064	62877.1	39408.8	39146.9	28096.9	38185.6	25834.5	16508.2	19228.1	24749.6	13652	8178.14	14068.1
0.78_306.0754m/z	306.075	0.77895	pos	Ritipenem	HMDB0257244				13187820		IKQNRQOUOZJHTR-UHFFFAOYSA-N	Organic acids and derivatives	Carboxylic acids and derivatives	Amino acids, peptides, and analogues	*	36.6	0	M+NH4	C10H12N2O6S	-0.235316	2.11875	0.0302646	0.278912	0.630178	1.54776	74733.3	48285	84772.4	44564.1	56562.1	70226.4	107977	84298.4	66957.3	58280.7	45927.5	35128.4	45354.2	38061.8
7.37_444.3835m/z	444.383	7.37328	pos	Momordenol	HMDB0031080	87392			85724901	189156-41-0	MEWYFWRPPPAWSI-UHFFFAOYSA-N	Lipids and lipid-like molecules	Steroids and steroid derivatives	Ergostane steroids	*	51.6	63.5	M+NH4	C29H46O2	-0.299731	2.0973	0.0410644	0.309304	0.603917	1.51984	83647.9	55037.4	95839.8	110788	78637.6	87719.3	75370.6	53531.8	25291.9	68411.4	53643.1	39405.3	53032.1	90440.6
1.05_233.1132m/z	233.113	1.04575	pos	Valylaspartic acid	HMDB0029123	23822			7009608	20556-16-5	OBTCMSPFOITUIJ-FSPLSTOPSA-N	Organic acids and derivatives	Carboxylic acids and derivatives	Amino acids, peptides, and analogues	**	57.5	0	M+H	C9H16N2O5	-0.0258733	2.07481	0.000929634	0.0764784	0.833531	1.78204	45747.2	25671.2	43833.9	28948.3	52939.4	47117.5	45494	56149.8	20013	26676.1	25418.6	21890.3	26137.5	33891.7
3.05_192.0425n	210.076	3.04918	pos	Scopoletin	HMDB0034344	6956		C01752	5280460	92-61-5	RODXRVNMMDRFIK-UHFFFAOYSA-N	Phenylpropanoids and polyketides	Coumarins and derivatives	Hydroxycoumarins	*	50	54.3	M+H, M+NH4	C10H8O4	1.33101	2.07145	1.57399e-06	0.003339	4.49059	22.4802	19358.9	861.15	22790.9	24622.8	21778.3	17607.8	12436.3	16917	1140.6	769.086	962.942	811.368	676.441	806.468
9.97_422.3263m/z	422.326	9.97188	pos	Alpha-linolenyl carnitine	HMDB0006319	58390			53477821		WJCRATGUUISKDG-UHMZJXMFSA-N	Lipids and lipid-like molecules	Fatty Acyls	Fatty acid esters	**	55.4	27.3	M+H	C25H43NO4	-0.393107	2.06519	0.0101129	0.19108	0.788098	1.7268	60297.6	34918.7	57333.9	72005.3	66941.6	61645	40802.9	63056.6	18584	19329.8	41058.5	23823.4	52456.7	54260.1
1.05_364.1363m/z	364.136	1.04575	pos	Mycotoxin T 2	HMDB0032864	88782			131751337	208346-80-9	UNNZZQOFLFJJJZ-UHFFFAOYSA-N	Organic oxygen compounds	Organooxygen compounds	Carbohydrates and carbohydrate conjugates	*	37.7	0	M+Na	C16H23NO7	-1.18488	2.0593	0.0252173	0.261686	-0.493771	0.710167	66388.8	93483.5	88639.4	68260.5	58740.7	49381.1	81151.2	52160	125610	66304.6	99432.9	82971.4	91946.3	94636
0.73_370.1058n	371.113	0.731017	pos	Paulownin		416910			3084131		CAQZFLPWHBKTTR-WNISUXOKSA-N	Unclassified	Unclassified	Unclassified	*	38.1	0	M+H, M+Na	C20H18O7	1.42539	2.04213	0.0439904	0.316826	0.157664	1.11548	288645	258763	292834	298481	306522	294932	252722	286377	294368	251798	272546	240555	270617	222693
6.26_331.1663m/z	331.166	6.25955	neg	10-alpha-methoxy-9,10-dihydrolysergol	HMDB0060995						JGQZSBLQHCTAJF-NFXPUDJFSA-N	Phenylpropanoids and polyketides	Linear 1,3-diarylpropanoids	Cinnamylphenols	*	38.2	0	M+FA-H	C17H22N2O2	-0.189412	2.04137	0.00216548	0.106382	11.8179	3610.24	19626	5.43619	11911	15761.6	34966.3	21699	30087.5	3330.47	4.23678e-05	32.6169	4.23678e-05	4.23678e-05	4.23678e-05	4.23678e-05
1.13_140.0682m/z	140.068	1.12627	pos	Norvaline	HMDB0013716	85259		C01799	439575	760-78-1	SNDPXSYFESPGGJ-SCSAIBSYSA-N	Organic acids and derivatives	Carboxylic acids and derivatives	Amino acids, peptides, and analogues	**	57.5	12.7	M+Na	C5H11NO2	0.418473	2.02317	0.00449804	0.142835	0.588991	1.50419	70356.1	46773.3	89630.1	82154.2	47265	63750.7	65888.6	73447.9	42889.7	41373.9	53369	53107.4	43513.7	46385.8
10.43_455.2037m/z	455.204	10.431	pos	Melleolide G	HMDB0038793	93436			14166120	117258-75-0	GGQLLLSSCCXUBL-UHFFFAOYSA-N	Lipids and lipid-like molecules	Prenol lipids	Sesquiterpenoids	*	38.8	0	M+Na	C24H32O7	-0.696324	2.02297	0.0070763	0.170296	28.9991	5.36533e+08	22731.8	4.23678e-05	29426.9	37586.1	40849.8	21999.1	5465.54	1063.1	4.23678e-05	4.23678e-05	4.23678e-05	4.23678e-05	4.23678e-05	4.23678e-05
4.89_332.2222m/z	332.222	4.89427	pos	2-(5-((2Z,5Z,8Z,11Z)-tetradeca-2,5,8,11-tetraen-1-yl)furan-2-yl)-ethanoic acid			LMFA01150035		10358283		ASCYUTAWNJPWQT-LTKCOYKYSA-N	Lipids and lipid-like molecules	Fatty Acyls	Fatty Acids and Conjugates	*	39.1	0	M+NH4	C20H26O3	0.558344	1.99777	0.000297693	0.0454291	7.612	195.632	18275.3	93.4169	18453.7	9920.63	8891.83	18118.2	30607.9	23659.7	50.386	126.183	119.29	38.9424	85.9834	139.717
1.06_655.1093m/z	655.109	1.06015	neg	Bryaquinone		48231	LMPK12070143		44257496		GRCODZNXJRUTGU-UHFFFAOYSA-N	Lipids and lipid-like molecules	Polyketides	Flavonoids	*	40.3	5.82	2M-H	C17H12O7	-0.0891314	1.99727	0.00572928	0.159252	-0.374693	0.77127	71598.6	92832.2	68027.9	80488.7	70219.8	64199.5	77192	69463.9	113878	78270.4	79673.8	89099.7	94581.9	101489
0.76_338.0851n	337.078	0.757467	neg	(5R)-5-[(1S)-1,2-Dihydroxyethyl]-3-[(2R,3R,4S,5S,6R)-3,4,5-trihydroxy-6-(hydroxymethyl)oxan-2-yl]oxyoxolane-2,4-dione	HMDB0260164				74959682		LSMAUOJGZPNABT-UHFFFAOYSA-N	Lipids and lipid-like molecules	Fatty Acyls	Fatty acyl glycosides	**	38.5	4.89	M-H, M+FA-H	C12H18O11	0.575405	1.98485	0.0162056	0.228595	0.705298	1.63048	63209.9	38767.6	40566.8	73622.4	70930.5	64759.9	56529.6	72850.2	22435	22477	39294.2	42605.8	39039.2	66754.5
11.42_572.2998m/z	572.3	11.4224	neg	PS(22:4(7Z,10Z,13Z,16Z)/0:0)		78841	LMGP03050014		52926282		JTHCCKGEGXLBGO-BIVCQWAISA-N	Lipids and lipid-like molecules	Glycerophospholipids	Glycerophosphoserines	**	51	0	M-H	C28H48NO9P	0.649854	1.97465	0.0263596	0.26456	-1.08239	0.472247	21933.8	46445.6	32103.1	17239.2	29133.3	21974.5	11215.4	19937	42345.6	76163.4	47129.5	65351.4	30344.4	17339.2
0.76_127.0389m/z	127.039	0.761983	pos	1,2,3-Trihydroxybenzene	HMDB0013674	65561		C01108	1057	87-66-1	WQGWDDDVZFFDIG-UHFFFAOYSA-N	Benzenoids	Phenols	Benzenetriols and derivatives	*	44.7	30.5	M+H	C6H6O3	-0.46242	1.96918	0.00391167	0.135028	-0.340312	0.78987	76136.4	96391	76247.6	80983	81818.8	64448.5	71745.7	81574.9	115203	97982.2	101335	85985.6	93541.2	84299.6
4.61_283.0825m/z	283.083	4.60645	neg	(S)-(+)-1-(p-Hydroxy-trans-cinnamoyl)-glycerol	HMDB0303070				5319874		YUQSZTOOHLGKGG-ZZXKWVIFSA-N	Phenylpropanoids and polyketides	Cinnamic acids and derivatives	Hydroxycinnamic acids and derivatives	***	58.4	35.2	M+FA-H	C12H14O5	0.807322	1.94748	0.0109928	0.19648	-1.43661	0.369433	13782.4	37307	5011.67	11983.5	9137.11	15316.7	30676	10569.6	46711.9	64706.5	33450.8	24326.5	34060.6	20585.4
0.76_155.0099m/z	155.01	0.757467	neg	Orotic acid	HMDB0000226	318		C00295	967	65-86-1	PXQPEWDEAKTCGB-UHFFFAOYSA-N	Organoheterocyclic compounds	Diazines	Pyrimidines and pyrimidine derivatives	***	72.6	89.8	M-H	C5H4N2O4	0.33668	1.91162	0.0218199	0.251092	-1.62727	0.323701	9792.11	30250.5	7172.74	12120.1	4301.23	10130.2	17376.2	7652.25	28918.5	9257.14	23366.9	50449.1	52960.3	16551.2
10.04_538.3155m/z	538.316	10.0439	neg	LysoPC(16:1(9Z)/0:0)	HMDB0010383	40288	LMGP01050022	C04230	24779461	76790-27-7	LFUDDCMNKWEORN-ZXEGGCGDSA-N	Lipids and lipid-like molecules	Glycerophospholipids	Glycerophosphocholines	***	75.9	98.7	M+FA-H	C24H48NO7P	0.995018	1.91135	0.0279204	0.271022	0.393075	1.31319	90579.1	68976.4	114547	74026.7	99005.6	82614.2	84818.4	88462.7	57908.4	88975.8	78672.6	70098.8	47114.3	71088.5
0.63_298.1875m/z	298.187	0.627433	pos	Feruloylcholine	HMDB0032800	88722			54470093	85927-25-9	XHSNXOZZHHJDDX-UHFFFAOYSA-O	Phenylpropanoids and polyketides	Cinnamic acids and derivatives	Hydroxycinnamic acids and derivatives	*	45.5	37.9	M+NH4	C15H22NO4+	-4.35129	1.90629	0.0013514	0.0886605	0.352618	1.27688	82712.2	64777	91051.2	73691.8	79896.7	79664	86587.5	85382.3	78605.5	61927.2	55242.9	64688.2	67163.8	61034.7
11.69_538.3440n	561.333	11.6944	pos	Gelliodesxanthin			LMPR01070594				VFPVMIPMYVASLR-TUCGVVRASA-N	Lipids and lipid-like molecules	Prenol lipids	Isoprenoids	*	37.9	0	M+H, M+Na	C37H46O3	-1.29423	1.89563	0.0175593	0.23325	0.883656	1.84504	48915.3	26511.7	77218.3	51931.6	60584.6	45047.8	23162	35547.6	23298.6	24812.4	26983.7	33273.8	24279.2	26422.6
4.81_345.1546m/z	345.155	4.80777	pos	Butyl (S)-3-hydroxybutyrate glucoside	HMDB0031694	87870			76463851		YUPCLHHTUNDMAN-UHFFFAOYSA-N	Lipids and lipid-like molecules	Fatty Acyls	Fatty acyl glycosides	**	48.6	0	M+Na	C14H26O8	8.07145	1.88881	0.00255851	0.113806	5.27061	38.6021	17729	459.276	8491.69	13646.1	13001.6	20505.8	37877.8	12850.9	487.159	330.94	216.45	588.019	654.218	478.867
0.75_275.1712m/z	275.171	0.746283	pos	Glutaminyllysine	HMDB0028802				71363012	45234-03-5	CLSDNFWKGFJIBZ-YUMQZZPRSA-N	Organic acids and derivatives	Carboxylic acids and derivatives	Amino acids, peptides, and analogues	**	50.5	0	M+H	C11H22N4O4	-0.674497	1.87192	0.00243685	0.112602	2.59102	6.02524	19827.5	3290.74	17113.6	12684.9	38114.3	19107.6	21192.8	10751.7	1645.11	7627.89	3841.62	943.996	1775.1	3910.72
5.68_784.2192m/z	784.219	5.68407	neg	Malvidin 3-p-coumarylrutinoside			LMPK12010385				FAUFNPIYYOOODX-NPQJFRCUSA-O	Lipids and lipid-like molecules	Polyketides	Flavonoids	*	37.6	3.18	M-H	C38H41O18+	-3.63755	1.86853	0.00889821	0.18388	0.935658	1.91276	38815.4	20292.8	51373.6	21047.8	29427.1	39322.7	54501.4	37219.5	19171.2	24213.4	11675.6	18699.5	29015.9	18981.4
6.30_413.2007m/z	413.201	6.30392	neg	3-(2-Phenylethenyl)hepta-2,4,6-trienenitrile	HMDB0257743				53730586		CNPMTFIIJOOTBN-UHFFFAOYSA-N	Benzenoids	Benzene and substituted derivatives	Styrenes	*	39.7	6.64	2M-H	C15H13N	-3.80378	1.8522	0.0132117	0.213059	-2.27934	0.205992	5560.72	26994.8	12584.4	10946.2	3279.82	2448.41	2877.14	1228.37	49909.2	36221.8	27733.7	3709.81	12016.1	32378
3.62_172.9914m/z	172.991	3.6191	neg	Phenol sulphate	HMDB0060015			C02180	74426	937-34-8	CTYRPMDGLDAWRQ-UHFFFAOYSA-N	Organic acids and derivatives	Organic sulfuric acids and derivatives	Arylsulfates	*	55.9	90.7	M-H	C6H6O4S	0.105073	1.85093	0.00273136	0.115512	1.05673	2.08022	32421.9	15585.8	31317.8	37004.9	41360.7	33357	31988.8	19502.2	18084	23194.3	23975.1	10483.8	12405.8	5371.98
4.60_478.2223m/z	478.222	4.59843	pos	Lipoxin E4		45972	LMFA03040006		9548803		KVXVULITEYDTNN-HGCWDHQMSA-N	Lipids and lipid-like molecules	Fatty Acyls	Eicosanoids	*	49.9	62	M+Na	C23H37NO6S	-2.43019	1.84842	3.09269e-06	0.00482391	7.97042	250.804	14739.8	58.7701	15723.6	21164.7	14935.9	13850.1	13526.9	9237.44	4.13001	43.1573	41.813	64.3466	58.3337	140.84
7.05_278.1517n	261.148	7.0497	pos	Emmotin A		53414	LMPR0103200001		42608142		GRTATZFIZSZURL-GXTWGEPZSA-N	Lipids and lipid-like molecules	Prenol lipids	Isoprenoids	*	53.8	71.6	M+H-H2O, M+NH4, M+Na	C16H22O4	-0.23803	1.84209	0.00130357	0.0882395	-1.64156	0.32051	8101.78	25277.8	6143.91	7984.48	6701.17	8256.86	11482	8042.33	27834.4	41809.7	20168.1	25190.4	22472	14192.1
1.17_116.0110n	115.004	1.16983	neg	Maleic acid	HMDB0000176	268686		C01384	444266	110-16-7	VZCYOOQTPOCHFL-UPHRSURJSA-N	Organic acids and derivatives	Carboxylic acids and derivatives	Dicarboxylic acids and derivatives	***	67.8	84.4	M-H, 2M-H	C4H4O4	0.0298727	1.83617	0.0176166	0.23325	-0.689454	0.620089	32814.7	52919.4	29662.1	50949.7	44862.7	32282.2	19491	19640.7	59546.2	58462.4	68380	45129.1	50046.2	35952.6
4.21_358.1267n	381.116	4.209	pos	Phlorisobutyrophenone 2-glucoside	HMDB0029651	86399			73009474	17004-75-0	PSBKCHXAPMSDFN-UHFFFAOYSA-N	Organic oxygen compounds	Organooxygen compounds	Carbohydrates and carbohydrate conjugates	***	59	31	M+NH4, M+Na	C16H22O9	0.936542	1.83227	0.0481435	0.327913	8.66794	406.735	21494.9	52.8474	1490.38	5542.36	7508.02	22630.3	64347.4	27450.7	4.23678e-05	4.23678e-05	4.23678e-05	233.835	34.1963	49.0531
12.94_588.4403m/z	588.44	12.9358	pos	1-(2-methoxy-5Z,19Z-hexacosadienyl)-sn-glycero-3-phosphoethanolamine			LMGP02060032		137323935		HOWFOHSAKZNNGK-HXPUTSELSA-N	Lipids and lipid-like molecules	Glycerophospholipids	Glycerophosphoethanolamines	*	46.6	41.2	M+H-H2O	C32H64NO7P	2.54578	1.80716	0.0101288	0.191085	0.663539	1.58396	54530.4	34426.6	65378.1	47894.2	54988.3	55492.5	36299.8	67129.7	28969.1	24062.2	39694.3	51381.5	24666.5	37785.8
0.73_353.0896m/z	353.09	0.725633	neg	2-Ethoxy-6(5-tetrazolyl)xanthone	HMDB0247563				146000		MPTIYRLFOQQXKE-UHFFFAOYSA-N	Organoheterocyclic compounds	Benzopyrans	1-benzopyrans	*	37.6	0	M+FA-H	C16H12N4O3	1.4291	1.80355	0.00910693	0.184996	-0.505456	0.704438	46295.7	65720.1	53029.9	34403.1	41459.8	45049.8	59719.4	44112.5	62551.9	66740.9	79227.1	75260.9	45546.7	64993.3
1.34_382.0738m/z	382.074	1.3353	pos	Triglochinin	HMDB0030934				6088720		LABCALMTQNDOAI-RPRRTJJHSA-N	Organic oxygen compounds	Organooxygen compounds	Carbohydrates and carbohydrate conjugates	*	38.2	0	M+Na	C14H17NO10	-1.81945	1.79632	0.0029861	0.119892	0.776393	1.71284	38086.1	22235.6	32368.3	29591.7	36322.1	38374.4	44308.8	47551.6	19322.1	25635.1	26477.3	8844.41	28242.3	24892.6
0.83_281.0361m/z	281.036	0.827467	neg	Tazobactam	HMDB0015544	581		C07771	123630	89786-04-9	LPQZKKCYTLCDGQ-WEDXCCLWSA-N	Organic acids and derivatives	Carboxylic acids and derivatives	Amino acids, peptides, and analogues	*	37.2	0	M-H2O-H	C10H12N4O5S	3.54951	1.79352	0.00265346	0.114959	0.661825	1.58208	45462.6	28735.9	45830	38365.6	38996.7	45214.7	50232.6	54136	30635.3	22524.1	16605.2	32124.7	29934.5	40591.8
4.00_359.1352m/z	359.135	4.00468	neg	1-(3,4-Dimethoxyphenyl)-1,2-ethanediol 1-O-b-D-glucoside	HMDB0034626	90089			85242014	251905-98-3	SXOCFAICCRYBCD-UHFFFAOYSA-N	Organic oxygen compounds	Organooxygen compounds	Carbohydrates and carbohydrate conjugates	***	67.6	49.1	M-H	C16H24O9	1.23355	1.7724	0.0340453	0.2891	10.4733	1421.63	19619.8	13.801	1924.65	3917.79	4038.75	24168.2	49092.5	34577.1	4.23678e-05	6.57449	4.23678e-05	53.2985	4.23678e-05	22.9327
12.36_362.2372m/z	362.237	12.3559	neg	N-Palmitoyltaurine	HMDB0240594	44910	LMFA08020080		14504290	83982-06-3	LPDJCYFKKSLKRO-UHFFFAOYSA-N	Lipids and lipid-like molecules	Fatty Acyls	Fatty amides	*	39.6	9.51	M-H	C18H37NO4S	0.362807	1.77144	0.0301748	0.278541	-1.14488	0.452228	15813.2	34967.3	11746.8	25480.6	20808.9	15704.2	9597.43	11541.1	23172.9	10975.2	62429.8	35947.2	43047.8	34231
0.79_484.1166m/z	484.117	0.794483	pos	KBT 1585 hydrochloride	HMDB0247783				3900		ZKUKMWMSYCIYRD-UHFFFAOYSA-N	Organoheterocyclic compounds	Lactams	Beta lactams	*	46.9	51	M+Na	C21H23N3O7S	3.78495	1.75509	0.0457971	0.322084	0.199696	1.14846	168654	146853	167457	157816	160069	175529	175342	175712	176655	119303	127466	159766	138712	159214
7.38_443.1716m/z	443.172	7.3768	neg	Sphenostylin A		48207	LMPK12070119		13946349		BXBXADHYISQJMC-UHFFFAOYSA-N	Lipids and lipid-like molecules	Polyketides	Flavonoids	*	41.8	13.6	M+FA-H	C23H26O6	1.07781	1.72239	0.000104115	0.0264542	28.1528	2.98431e+08	12643.9	4.23678e-05	10601.2	8506.42	14494.5	14352.3	20828.2	7080.64	4.23678e-05	4.23678e-05	4.23678e-05	4.23678e-05	4.23678e-05	4.23678e-05
11.07_297.2668n	320.256	11.0708	pos	3-Ketosphingosine	HMDB0245914				440922		VWTPJNGTEYZXFV-UHFFFAOYSA-N	Organic oxygen compounds	Organooxygen compounds	Carbonyl compounds	***	66.9	38.8	M+H-H2O, M+H, M+Na	C18H35NO2	-0.0527184	1.69821	0.0254499	0.261961	0.420634	1.33852	71381.4	53328.7	50592.6	80080.9	85546.4	81639	65510.4	64918.9	58543	62531.9	47287.1	64336.8	37585.2	49688.5
12.54_643.3154m/z	643.315	12.5423	pos	Coproporphyrinogen III	HMDB0001261	6116		C03263	321	2624-63-7	NIUVHXTXUXOFEB-UHFFFAOYSA-N	Organoheterocyclic compounds	Tetrapyrroles and derivatives	Porphyrins	*	36.4	0	M+H-H2O	C36H44N4O8	4.25579	1.69531	0.000690659	0.0655144	1.68201	3.20875	20656.3	6437.49	27738.7	15821.8	18965.6	18367.9	15613	27430.6	2970.76	882.298	5073.81	6560.85	9388.48	13748.7
0.86_156.0421m/z	156.042	0.85875	pos	N,N-dimethyl-beta-alanine	HMDB0304421						KAUSGXYXRRGGFJ-UHFFFAOYSA-M	Organic acids and derivatives	Carboxylic acids and derivatives	Carboxylic acid derivatives	**	58.6	3.73	M+K	C5H11NO2	0.000173063	1.69438	0.00993154	0.189806	0.542212	1.4562	55457.2	38083.4	72395.3	63265.3	35313.4	48322.8	55743.3	57703	31986.7	35638.3	37720.5	39776.7	38735.3	44642.7
0.74_157.0367m/z	157.037	0.741033	neg	Allantoin	HMDB0000462	89		C01551	204	97-59-6	POJWUDADGALRAB-UHFFFAOYSA-N	Organoheterocyclic compounds	Azoles	Imidazoles	***	73.4	87.2	M-H	C4H6N4O3	-0.185502	1.69202	0.00553297	0.155183	-0.305939	0.808915	64776	80077.6	74339.4	61981.7	61987.4	61710.4	72334.8	56302.1	88851.6	70316.1	74606.2	90510.6	79180.8	77000.2
0.69_259.0224m/z	259.022	0.69395	neg	Galactose 1-phosphate	HMDB0000645	455416		C00446	123912		HXXFSFRBOHSIMQ-FPRJBGLDSA-N	Organic oxygen compounds	Organooxygen compounds	Carbohydrates and carbohydrate conjugates	***	66.9	42.7	M-H	C6H13O9P	0.00550453	1.69098	0.00677073	0.167557	0.205158	1.15281	110666	95996.1	103995	107734	114206	107640	124826	105593	107357	87531.3	97323.5	92424.8	91089.3	100251
4.50_315.0527m/z	315.053	4.49997	neg	4'-Hydroxyclobazam	HMDB0060771				14275474		NKSXJAYACJZMBM-UHFFFAOYSA-N	Organoheterocyclic compounds	Benzodiazepines	Unclassified	*	41.2	41	M-H	C16H13ClN2O3	-4.70562	1.68767	0.00688835	0.168579	3.97596	15.7356	16523.5	1050.07	19680.3	20988.9	33202.6	17278.8	4860.17	3130.22	672.823	767.295	645.083	1093.7	1793.83	1327.7
1.83_271.0749m/z	271.075	1.82632	pos	3-(Cystein-S-yl)acetaminophen	HMDB0240217				171264	53446-10-9	LLHICPSCVFRWDT-QMMMGPOBSA-N	Organic acids and derivatives	Carboxylic acids and derivatives	Amino acids, peptides, and analogues	*	44.4	27.6	M+H	C11H14N2O4S	0.768122	1.68479	0.0438903	0.316571	0.598315	1.51395	54165	35777.4	52224.4	51289.7	75534.5	52326.6	43902.1	49712.9	55716.7	54339.4	28017.8	36297.8	16916.2	23376.3
2.56_737.1680m/z	737.168	2.56463	neg	Bisphenol A bis(diphenyl phosphate)	HMDB0247001	329007			9874825		BQPNUOYXSVUVMY-UHFFFAOYSA-N	Benzenoids	Benzene and substituted derivatives	Diphenylmethanes	*	36.5	0	M+FA-H	C39H34O8P2	-4.51478	1.65708	0.0285076	0.272299	0.689168	1.61235	44782.7	27774.7	51268.6	32205	43435.2	46312.9	40975.2	54499.4	20194.9	55332.6	15790.3	28845.9	25582.9	20901.9
6.26_749.2984m/z	749.298	6.25955	neg	Simmondsin	HMDB0030394						KURSRHBVYUACKS-CLTKARDFSA-N	Organic oxygen compounds	Organooxygen compounds	Carbohydrates and carbohydrate conjugates	*	37	0	2M-H	C16H25NO9	-0.25814	1.6555	0.029991	0.277494	28.4687	3.71475e+08	15738.6	4.23678e-05	4230.56	8126.25	40878.6	15814.8	25381.2	4.23678e-05	4.23678e-05	4.23678e-05	4.23678e-05	4.23678e-05	4.23678e-05	4.23678e-05
4.73_328.2121m/z	328.212	4.73048	pos	Sebacoyl-L-carnitine	HMDB0240726		LMFA07070100		71464537		GBFPILOKXGQZKW-UHFFFAOYSA-N	Lipids and lipid-like molecules	Fatty Acyls	Fatty acid esters	***	52.8	64.2	M+H-H2O	C17H31NO6	0.758188	1.63789	0.000141994	0.0309667	4.09787	17.1231	12626.1	737.37	8930.26	11074.2	8064.73	14331.6	21534.7	11821	892.574	541.339	857.516	900.733	669.874	562.186
6.26_414.1383m/z	414.138	6.25955	neg	2-[5-Methoxy-2-methyl-1-[(4-methylsulfanylphenyl)methyl]indol-3-yl]propanoic acid	HMDB0254775				6451644		QTUGRCJHUSVWGW-UHFFFAOYSA-N	Organoheterocyclic compounds	Indoles and derivatives	Indolyl carboxylic acids and derivatives	*	37.8	0.299	M+FA-H	C21H23NO3S	0.707669	1.63699	0.00368704	0.131793	4.57687	23.8658	13550.3	567.772	7883.03	11511.7	25423.7	14779.7	19871.8	1831.92	797.734	1089.48	445.675	206.977	363.558	503.211
1.04_272.0888m/z	272.089	1.04432	neg	Cytosine deoxyribonucleoside	HMDB0250725				637		CKTSBUTUHBMZGZ-UHFFFAOYSA-N	Nucleosides, nucleotides, and analogues	Pyrimidine nucleosides	Pyrimidine 2'-deoxyribonucleosides	***	59.4	50.2	M+FA-H	C9H13N3O4	0.124838	1.62293	0.00165637	0.0956716	0.58007	1.49492	36753	24585.2	33160.8	28178.7	36364.9	39336.9	44713.4	38763.2	28882.2	29027.2	20558.2	20885.9	21323	26834.9
1.23_408.1490m/z	408.149	1.23068	pos	Minoxidil Glucuronide	HMDB0254740				74765399		WJHSTCUDHNONOO-UHFFFAOYSA-N	Organic oxygen compounds	Organooxygen compounds	Carbohydrates and carbohydrate conjugates	*	40	8.55	M+Na	C15H23N5O7	-0.00717552	1.61581	0.0120585	0.204858	0.622946	1.54002	47122.8	30598.9	60424.5	56211.8	27001.4	45796.1	47761.8	45541	24482.6	23174.2	28356.6	39791.7	32820.7	34967.5
9.70_414.3729m/z	414.373	9.70235	pos	3-Keto-4-methylzymosterol	HMDB0006838			C15816	53477900		DBPZYKHQDWKORQ-JQDPPCHWSA-N	Lipids and lipid-like molecules	Steroids and steroid derivatives	Cholestane steroids	*	43.6	22.9	M+NH4	C28H44O	-0.403339	1.61189	0.0309866	0.280587	0.599715	1.51542	50453.5	33293.5	61912.9	60466.2	60050.5	49696.6	30870.1	39724.7	13138.9	45428.4	33390.3	34121.8	35953.6	37727.8
4.99_169.1223m/z	169.122	4.99247	pos	exo,exo-1,8-Epoxy-p-menthane-2,6-diol	HMDB0041376	71823		C17620	115056	38223-98-2	JSNQSLSBBZFGBM-UHFFFAOYSA-N	Organoheterocyclic compounds	Oxanes	Unclassified	**	50.3	30	M+H-H2O	C10H18O3	0.138707	1.60382	0.0186207	0.238744	3.12149	8.70288	15939	1831.46	6213.86	8035.34	14181.8	18352.5	39400.9	9449.39	1877.39	1684.16	1771.74	2050.64	1878.52	1726.29
0.69_333.0594m/z	333.059	0.69395	neg	Glycerophosphoinositol	HMDB0011649			C01225		129830-95-1	BMVUIWJCUQSHLZ-UJGXJMNGSA-N	Lipids and lipid-like molecules	Glycerophospholipids	Glycerophosphoinositols	***	64.7	41.1	M-H	C9H19O11P	0.611618	1.59743	0.0373243	0.298847	-0.402173	0.756718	56704.1	74934.3	61864.2	45735.6	53468.6	54353	80410.9	44392.2	84765.1	56453.5	62345.7	74433	82533.9	89074.5
6.21_529.1680m/z	529.168	6.21303	pos	GMP-N-epsilon-(N-alpha-acetyl lysine methyl ester) 5'-phosphoramidate	HMDB0304375						CFNHKQLBSCCNGG-UHFFFAOYSA-M	Organic acids and derivatives	Carboxylic acids and derivatives	Amino acids, peptides, and analogues	*	39.4	0	M+H-H2O	C19H29N7O10P-	-0.0644271	1.59626	0.000292059	0.0454291	28.0287	2.73826e+08	11601.4	4.23678e-05	18172	12980.4	8379.86	10527.1	15859.4	3689.62	4.23678e-05	4.23678e-05	4.23678e-05	4.23678e-05	4.23678e-05	4.23678e-05
0.74_304.1151m/z	304.115	0.741033	neg	Hydroxyprolyl-Glutamine	HMDB0028861	85769			61157217		BCLVLAZXTOULCD-UHFFFAOYSA-N	Organic acids and derivatives	Carboxylic acids and derivatives	Amino acids, peptides, and analogues	**	58.2	0	M+FA-H	C10H17N3O5	0.450867	1.59092	0.0288496	0.273308	0.624313	1.54148	43461.4	28194.6	55576.7	28029.6	50233.9	40313.6	33617.4	52997	23023.7	32026.9	42664.8	19774.9	18297.9	33379.7
0.63_324.1534n	325.161	0.627433	pos	5-(Galactosylhydroxy)-L-Lysine	HMDB0242167				66995551		OWGKYELXGFKIHH-KVUIFDSDSA-N	Lipids and lipid-like molecules	Fatty Acyls	Fatty acyl glycosides	**	55.2	0	M+H, M+Na	C12H24N2O8	0.433711	1.5897	0.00384654	0.134316	-0.332766	0.794013	50495.6	63595.4	50307.9	55318.4	40647.2	50781.7	52105.2	53812.9	74532.6	57901.8	63279.9	59053.2	57868.7	68936.2
5.84_327.1453m/z	327.145	5.8402	neg	Perilloside B	HMDB0040465	94965			73815069		CDSQRAACZGXZNE-UHFFFAOYSA-N	Lipids and lipid-like molecules	Prenol lipids	Terpene glycosides	**	55.6	23.4	M-H	C16H24O7	1.04593	1.5866	0.0171699	0.232395	8.00203	256.36	13815.3	53.89	4238.62	6614.99	10473.6	16507.5	36388.7	8668.06	4.23678e-05	4.23678e-05	4.23678e-05	4.23678e-05	4.23678e-05	323.34
10.45_602.2021m/z	602.202	10.4494	pos	Dapagliflozin 3-o-glucuronide	HMDB0259686				139600775		ZYZULHSUKTZGTR-UHFFFAOYSA-N	Organic oxygen compounds	Organooxygen compounds	Carbohydrates and carbohydrate conjugates	*	37.5	0	M+NH4	C27H33ClO12	3.87351	1.58653	0.0050052	0.14958	-0.497385	0.70839	32546.3	45944.1	38653.2	27921.2	35993	34810	26332.2	31568.3	48725	54279.9	43062.9	54238.5	40304.2	35054
0.79_244.1412n	262.175	0.794483	pos	Isoleucylhydroxyproline	HMDB0028908					90965-80-3	IFZSZULHIWFRSB-KZVJFYERSA-N	Organic acids and derivatives	Carboxylic acids and derivatives	Amino acids, peptides, and analogues	*	36.3	0	M+H, M+NH4	C11H20N2O4	-4.70834	1.56959	0.00703653	0.170228	-0.437415	0.738457	37736.9	51102.4	41200.9	42385.7	34450.8	32974.5	37982.5	37426.9	52620.9	64921.8	44170.1	57714	42039.7	45147.7
4.24_361.1508m/z	361.151	4.23755	neg	3-Methyl-3-butenyl apiosyl-(1->6)-glucoside	HMDB0031954	88066			131751223	198832-72-3	DZEALCQVCAOHSL-UHFFFAOYSA-N	Lipids and lipid-like molecules	Fatty Acyls	Fatty acyl glycosides	***	65.6	40.6	M-H2O-H	C16H28O10	1.14188	1.55776	0.00567166	0.158122	7.58866	192.493	12459	64.7247	4526	5971.97	7940.26	14044.4	28078.7	14192.7	4.23678e-05	26.7649	29.7348	28.2072	49.1771	254.464
3.99_376.1373n	357.119	3.99488	neg	Loganic acid		44647	LMPR01020138	C01512	89640	22255-40-9	JNNGEAWILNVFFD-CDJYTOATSA-N	Lipids and lipid-like molecules	Prenol lipids	Isoprenoids	*	42.6	19.7	M-H2O-H, M-H	C16H24O10	1.03674	1.54889	0.0198695	0.243647	4.89755	29.8063	14254	478.221	2675.43	5695.02	5798.11	17604.9	35034.5	18716	1494.08	245.418	146.963	83.8519	708.392	190.624
7.64_352.2244n	335.221	7.64477	pos	15-Keto-prostaglandin F2a	HMDB0004240	7035	LMFA03010026	C05960	5280887	35850-13-6	LOLJEILMPWPILA-AMFHKTBMSA-N	Lipids and lipid-like molecules	Fatty Acyls	Eicosanoids	***	66.3	52.1	M+H-H2O, M+NH4, M+Na	C20H32O5	-1.5508	1.53231	0.0164957	0.230175	-1.00692	0.497608	14070.4	28276.1	13117.8	19014	9922.09	13789.8	15686.2	12892.7	41290.1	29863.8	42646.6	21908.5	19300.1	14647.5
12.94_413.3213m/z	413.321	12.9358	pos	Sintaxanthin	HMDB0035640				131751825		SLQHGWZKKZPZEK-ZQFWBWLTSA-N	Lipids and lipid-like molecules	Prenol lipids	Triterpenoids	*	37.5	0.772	M+H-H2O	C31H42O	2.46717	1.5141	0.0181223	0.235721	0.352656	1.27691	69302.2	54273.4	75167.2	61370.5	71044.5	68543.3	57303.3	82384.3	50103.5	48174.4	55359.4	71146.1	44716.2	56140.7
4.39_516.1654m/z	516.165	4.39455	pos	Neoacrimarine G	HMDB0031135				131751141		MNOCITGIWBOSNH-UHFFFAOYSA-N	Benzenoids	Benzene and substituted derivatives	Phenylpropanes	*	37.7	0	M+H	C29H25NO8	0.231584	1.50723	7.85779e-06	0.00733446	8.20644	295.382	9638.1	32.6293	12402.6	10126.7	12340.2	9489.81	8656.02	4813.31	61.778	65.1699	68.8275	4.23678e-05	4.23678e-05	4.23678e-05
7.64_352.2253n	351.218	7.64413	neg	Prostaglandin E2	HMDB0001220	6089	LMFA03010003	C00584		363-24-6	XEYBRNLFEZDVAW-ARSRFYASSA-N	Lipids and lipid-like molecules	Fatty Acyls	Eicosanoids	***	68.7	89.4	M-H2O-H, M-H	C20H32O5	0.958731	1.5047	0.0205501	0.246169	-1.63631	0.321678	6778.23	21071.5	5965.62	10879.1	3318.42	6697.62	8874.25	4934.38	36275.1	24675.2	34041.5	11379.1	13508.4	6549.41
10.27_340.3207m/z	340.321	10.2676	pos	Neryl 8-methyldecanoate			LMFA07011156				CGTSMPFIFKBTNI-SILNSSARSA-N	Lipids and lipid-like molecules	Fatty Acyls	Fatty esters	*	48.2	50	M+NH4	C21H38O2	-1.04862	1.50259	0.0127166	0.209944	1.66665	3.17477	20614.4	6493.18	10754.9	19792.9	20290.5	22927.6	10874.2	39046.2	1058.73	9506.08	2560.68	12242.2	3112.82	10478.6
4.50_413.1433m/z	413.143	4.49997	neg	Benzyl gentiobioside	HMDB0041515	95899			4155678	56775-64-5	LLEMMFPELBNINR-UHFFFAOYSA-N	Organic oxygen compounds	Organooxygen compounds	Carbohydrates and carbohydrate conjugates	**	57.1	1.49	M-H2O-H	C19H28O11	-4.59484	1.49275	0.0290507	0.274231	9.29823	629.572	12989.8	20.6327	3592.94	5614.14	6088.7	18363.9	36133.3	8145.62	6.2409	53.2754	5.81283	11.6575	20.2678	26.5416
12.26_373.2111m/z	373.211	12.2604	pos	2-((5-(Diethylamino)-[1,2,4]triazolo[1,5-a]pyrimidin-7-yl)(hexyl)amino)ethanol	HMDB0244283				127644		NWCVGIMEZSWINX-UHFFFAOYSA-N	Organoheterocyclic compounds	Triazolopyrimidines	Unclassified	*	39	0	M+K	C17H30N6O	-0.600241	1.49044	0.0452666	0.32077	-0.524201	0.695344	33562.4	48267.3	45166.6	28792.7	34290.4	31530.9	19530.7	42063	55370.4	53542.9	60440.5	55608.5	29125.1	35516.4
5.49_539.1233m/z	539.123	5.49177	neg	2-O-Galloylsucrose	HMDB0039281	93869			14055563	115713-46-7	LNFBBISCIPAUAE-UHFFFAOYSA-N	Benzenoids	Benzene and substituted derivatives	Benzoic acids and derivatives	*	37.9	1.25	M+FA-H	C19H26O15	-4.12203	1.48241	0.000389888	0.0516934	27.7907	2.32192e+08	9837.47	4.23678e-05	7482.7	5312.05	7316.19	11148.1	18339.3	9426.49	4.23678e-05	4.23678e-05	4.23678e-05	4.23678e-05	4.23678e-05	4.23678e-05
11.45_348.2895m/z	348.289	11.4486	pos	Anandamide	HMDB0004080	3721	LMFA08040001	C11695	5281969	94421-68-8	LGEQQWMQCRIYKG-DOFZRALJSA-N	Organic nitrogen compounds	Organonitrogen compounds	Amines	***	57.5	89.6	M+H	C22H37NO2	-0.732712	1.47374	0.00712015	0.170818	-1.10415	0.465178	9946.94	21383.1	11368.6	5706.37	8898.47	9784.3	9713.4	14210.6	28192.8	23680.1	17290.4	29119.6	21956.1	8059.61
8.87_405.1017m/z	405.102	8.87215	neg	4-(4-Fluorophenyl)-2-(4-nitrophenyl)-5-(4-pyridyl)-1H-imidazole	HMDB0244687	64644			4712	152121-53-4	BGIYKDUASORTBB-UHFFFAOYSA-N	Organoheterocyclic compounds	Azoles	Imidazoles	*	38.5	0	M+FA-H	C20H13FN4O2	3.58288	1.47004	0.0458591	0.322132	28.3137	3.33639e+08	14135.5	4.23678e-05	1069.26	1521.54	1352.32	17981.2	36284	26605	4.23678e-05	4.23678e-05	4.23678e-05	4.23678e-05	4.23678e-05	4.23678e-05
4.61_476.2077m/z	476.208	4.60645	neg	Neoaureothin			LMPK09000037		10096575		IZICQJAGBLBAMJ-QDYRYYKCSA-N	Lipids and lipid-like molecules	Polyketides	Polyether antibiotics	*	37.6	0	M-H	C28H31NO6	-0.397495	1.46702	9.49653e-06	0.00746754	13.111	8847.24	9418.88	1.06461	10297.6	14022.1	9648.4	9170.84	7824.8	5549.49	4.23678e-05	4.23678e-05	4.23678e-05	4.23678e-05	4.23678e-05	6.38746
0.71_104.0110n	207.015	0.709183	neg	Hydroxypyruvic acid	HMDB0001352	482		C00168	964	1113-60-6	HHDDCCUIIUWNGJ-UHFFFAOYSA-N	Organic acids and derivatives	Hydroxy acids and derivatives	Beta hydroxy acids and derivatives	**	45.6	0	M-H, 2M-H	C3H4O4	0.231274	1.46202	0.0356704	0.293812	0.467188	1.38241	53500.3	38700.7	43184.3	75275.5	51583.2	55390.9	50546.2	45021.4	26251.2	37037.3	47212.5	30497.3	50840.6	40365.1
0.73_102.0913m/z	102.091	0.731017	pos	N-Ethylpropionamide	HMDB0302430	340840			521324		ABMDIECEEGFXNC-UHFFFAOYSA-N	Organic acids and derivatives	Carboxylic acids and derivatives	Carboxylic acid derivatives	*	41.8	15.1	M+H	C5H11NO	-0.607513	1.45563	0.0255389	0.262418	-1.44878	0.366331	7937.39	21667.3	9539.39	9151.01	9936.45	6805.2	5831.37	6360.91	40695.8	27200.5	28374.6	14835.4	12899.7	5997.55
6.25_443.1262m/z	443.126	6.2536	pos	Fulvinervin C		48613	LMPK12110180		44257642		BXQGCKPPJCXQCL-ZRDIBKRKSA-N	Lipids and lipid-like molecules	Polyketides	Flavonoids	*	38.4	4.04	M+K	C25H24O5	1.56476	1.4525	0.000751207	0.0684743	8.52441	368.217	9582.52	26.0241	6858.48	9134.43	14619.8	10254.9	14774.7	1852.82	54.7468	18.8076	4.23678e-05	22.7119	25.1625	34.716
5.02_481.1310m/z	481.131	5.02187	neg	Phlorizin	HMDB0036634	3535		C01604	6072	60-81-1	IOUVKUPGCMBWBT-QNDFHXLGSA-N	Phenylpropanoids and polyketides	Flavonoids	Flavonoid glycosides	**	41.3	0	M+FA-H	C21H24O10	-9.55325	1.44758	0.0342399	0.289768	5.68124	51.3126	12691.6	247.338	2733.38	5283.44	7397.96	16355.3	36285.2	8094.1	0.761967	39.7534	47.144	473.698	781.597	141.074
14.17_536.5037m/z	536.504	14.1708	pos	Cer(t18:1(6OH)/16:0)			LMSP02010148				CAXCJECPKVAJKC-GBIVXHQOSA-N	Lipids and lipid-like molecules	Sphingolipids	Ceramides	*	51.6	65.2	M+H-H2O	C34H67NO4	0.0385843	1.4451	0.00844507	0.180468	-0.89124	0.539151	13163.7	24415.6	9635.87	13431.6	16111.1	16046.9	14786.9	8969.78	20537.7	16920.2	30873.9	29955.6	33099.6	15106.7
0.78_526.1413m/z	526.141	0.775883	neg	Adafosbuvir	HMDB0259659				123473753		NIJYGVDQZBBONK-UHFFFAOYSA-N	Organic acids and derivatives	Carboxylic acids and derivatives	Amino acids, peptides, and analogues	*	37.3	0	M-H2O-H	C22H29FN3O10P	3.02714	1.43904	0.009064	0.184756	0.676615	1.59838	28895.7	18078.1	21182.1	25687.5	37993.8	31598.8	31462.9	25449.2	23810	12838.9	18192.7	16560.3	11615.7	25450.8
0.70_273.0749m/z	273.075	0.699383	pos	Cyclo(his-pro)	HMDB0250630				3085031		NAKUGCPAQTUSBE-UHFFFAOYSA-N	Organic acids and derivatives	Carboxylic acids and derivatives	Amino acids, peptides, and analogues	*	37.6	0	M+K	C11H14N4O2	0.474551	1.43447	0.00522247	0.151673	-1.20685	0.433213	8133.8	18775.5	4317.78	12475.4	8649.89	8683.78	11225.1	3450.82	24769.9	7577.09	15629.1	23950.1	20725.2	20001.5
0.78_366.0503m/z	366.05	0.775883	neg	Tetraphyllin B sulfate	HMDB0038486	93165			435458	85758-30-1	OXUIYNFEUWRHJJ-UHFFFAOYSA-N	Organic oxygen compounds	Organooxygen compounds	Carbohydrates and carbohydrate conjugates	*	38.3	9.37	M-H	C12H17NO10S	0.703833	1.42946	0.0256564	0.263161	0.938489	1.91652	25963	13546.9	21857.6	15230.9	21108.9	25203.3	36468.1	35909.1	9454.6	8040.76	7863.4	14243.4	13005.9	28673.6
4.68_583.3247m/z	583.325	4.68068	pos	POV-PG			LMGP20060015		134812468		QLZLSMOBIJWBNU-LOSJGSFVSA-N	Lipids and lipid-like molecules	Glycerophospholipids	Oxidized glycerophospholipids	*	39.1	0	M+H	C27H51O11P	0.894218	1.42641	0.0493705	0.330293	-0.561721	0.677493	28591.7	42202.2	17824.6	34394.4	28661.2	38204.5	31298.5	21167.1	34983.7	30886.8	61616.3	49171.1	47525.5	29029.9
3.81_445.1394m/z	445.139	3.80808	pos	Euchrenone a2		52794	LMPK12140310		14134103		HLKHOVQEAJNZDM-UHFFFAOYSA-N	Lipids and lipid-like molecules	Polyketides	Flavonoids	*	38	4.51	M+K	C25H26O5	-4.35435	1.42406	0.000502224	0.0599692	0.483856	1.39848	34427.5	24617.9	33711	40789.7	31322.6	34622.8	33421	32697.9	21097.3	27943.7	26134.2	20633.6	28550.5	23347.9
8.51_406.2724n	451.271	8.51455	neg	3alpha,12beta-Dihydroxy-11-oxo-5beta-cholan-24-oic Acid			LMST04010188		248928		DBKCKIVBUXCUCX-BOUFHLEDSA-N	Lipids and lipid-like molecules	Steroids and steroid derivatives	Bile acids and derivatives	*	48.5	47.5	M-H, M+FA-H	C24H38O5	1.11175	1.42115	0.04005	0.306366	1.98131	3.94851	16932.1	4288.23	19613.2	1044.39	4135.08	16398.3	33382.7	27019	1479.36	7743.01	2377.94	3701.95	708.556	9718.56
4.02_310.1421n	328.176	4.0186	pos	Lersivirine	HMDB0254020	330288			16739244		MCPUZZJBAHRIPO-UHFFFAOYSA-N	Organic oxygen compounds	Organooxygen compounds	Ethers	*	40.5	10.7	M+NH4, M+Na	C17H18N4O2	-2.86003	1.41726	1.32441e-06	0.00309051	3.55344	11.7407	9075.23	772.974	8594.51	10414.1	10399.9	9249.69	10365.6	5427.6	899.169	358.035	1624.87	363.869	706.8	685.103
9.63_387.2183m/z	387.218	9.62528	neg	cannogenin		57774	LMST01120004		12302396		JNTNUSUPTSNMNJ-NNNAONFXSA-N	Lipids and lipid-like molecules	Steroids and steroid derivatives	Sterols	*	51.2	64.2	M-H	C23H32O5	1.61567	1.41182	0.0198299	0.243647	8.85541	463.175	12175.7	26.2875	28325.6	14257.2	19520.2	8772.39	1848.17	330.57	71.7958	4.23678e-05	85.9288	4.23678e-05	4.23678e-05	4.23678e-05
0.71_282.0653m/z	282.065	0.709183	neg	Deoxythioguanosine	HMDB0251016						XONAGRHHONPFHI-UHFFFAOYSA-N	Nucleosides, nucleotides, and analogues	Purine nucleosides	Purine 2',3'-dideoxyribonucleosides	*	36.5	0	M-H	C10H13N5O3S	-4.65841	1.40438	0.0024953	0.11372	1.24119	2.36393	17926.2	7583.21	15168.8	21727.5	23175.3	18528	8554.07	20403.5	3229.85	13200	8239.39	5329.31	7706.95	7793.71
9.35_803.3646m/z	803.365	9.34637	pos	Spinacoside D	HMDB0034871				131751632		WEUHEQAOZHTARY-UHFFFAOYSA-N	Lipids and lipid-like molecules	Prenol lipids	Terpene glycosides	*	38	0	M+K	C40H60O14	4.07977	1.40065	0.0134927	0.214084	28.0452	2.76977e+08	11734.9	4.23678e-05	25097.5	17613.1	15921	9550.6	1105.63	1121.82	4.23678e-05	4.23678e-05	4.23678e-05	4.23678e-05	4.23678e-05	4.23678e-05
4.74_359.1352m/z	359.135	4.73775	neg	Deoxyloganic acid	HMDB0037028			C11647	4490284	92842-56-3	DSXFHNSGLYXPNG-UHFFFAOYSA-N	Lipids and lipid-like molecules	Prenol lipids	Terpene glycosides	**	59.2	7.44	M-H	C16H24O9	1.26514	1.37692	0.0156028	0.226086	5.29883	39.3646	11028.7	280.168	2227.48	4063.6	4354.53	13457.1	25073	16996.7	27.2516	116.063	162.41	495.107	109.261	770.917
0.76_304.0610m/z	304.061	0.757467	neg	Arasc	HMDB0248564				5253499		RHFUOMFWUGWKKO-UHFFFAOYSA-N	Nucleosides, nucleotides, and analogues	Pyrimidine nucleosides	Unclassified	*	45.2	37.7	M+FA-H	C9H13N3O4S	0.651692	1.37664	0.0166381	0.230538	0.843992	1.79501	24244.9	13506.8	28182.7	14358.1	15399.7	22398.6	35127	30003.1	19462.8	16717.4	11109.1	9739.48	13218.9	10793.2
12.20_411.3037m/z	411.304	12.2042	pos	24-norcholesterol		83916	LMST01010315		193773		VQSNHPSNPFDOJF-XSLNCIIRSA-N	Lipids and lipid-like molecules	Steroids and steroid derivatives	Sterols	*	38.3	0	M+K	C26H44O	3.52705	1.37246	0.0272777	0.268739	0.74332	1.67402	32240.1	19259.1	52841	30727.5	27845.4	29854.1	17926.8	34246	19560.5	14888.5	18735.9	26479.9	14622.8	21266.7
4.02_344.2073m/z	344.207	4.0186	pos	5-Hydroxydecanedioylcarnitine	HMDB0241133						FKPIGZRWQUALGA-UHFFFAOYSA-N	Lipids and lipid-like molecules	Fatty Acyls	Fatty acid esters	***	64.7	66.3	M+H-H2O	C17H31NO7	1.4661	1.36819	0.0101502	0.19132	2.56053	5.89923	12639.1	2142.5	3730.11	9831.72	4974.82	13981.6	24637.6	18678.7	2780.66	1738.5	1165.24	2328.48	3112.47	1729.63
10.34_632.3183m/z	632.318	10.3358	neg	Retaspimycin	HMDB0257169				72997919		OAKGNIRUXAZDQF-UHFFFAOYSA-N	Phenylpropanoids and polyketides	Macrolactams	Unclassified	**	50.3	5.53	M+FA-H	C31H45N3O8	-0.974322	1.36754	0.0334441	0.287923	0.28306	1.21677	68530.9	56321.8	78263.2	67404.2	66311.8	74652.4	68229.6	56324.1	59408.8	52894.5	51751	51560.1	74147.1	48169.5
1.17_252.9967m/z	252.997	1.16983	neg	PYROMELLITIC ACID	HMDB0256992						CYIDZMCFTVVTJO-UHFFFAOYSA-N	Organic acids and derivatives	Carboxylic acids and derivatives	Tetracarboxylic acids and derivatives	*	37.6	0.0147	M-H	C10H6O8	-8.92171	1.35317	0.0246833	0.260039	-1.02041	0.492977	11182.6	22683.8	8309.21	21082.8	17850.5	11213.5	4029.77	4609.79	26893.6	28009.3	33080.5	16952.2	19821.1	11346.2
1.51_322.1070m/z	322.107	1.51497	pos	2-Amino-5-((1-((carboxymethyl)amino)-3-(methylthio)-1-oxopropan-2-yl)amino)-5-oxopentanoic acid	HMDB0244993						QTQDDTSVRVWHMO-UHFFFAOYSA-N	Organic acids and derivatives	Carboxylic acids and derivatives	Amino acids, peptides, and analogues	***	56.1	47.8	M+H	C11H19N3O6S	0.772043	1.35221	0.00221106	0.107267	0.988752	1.98447	18533.7	9339.4	16081.7	18448.6	14102.1	18755.2	23694.6	20120.2	6427.14	8500.72	4471.09	7471.15	12843.8	16322.5
11.32_693.4507m/z	693.451	11.3172	pos	PA(i-16:0/20:5(5Z,8Z,11Z,14Z,16E)-OH(18R))	HMDB0267787						AFFYZMMLBOOJST-CESLDFELSA-N	Unclassified	Unclassified	Unclassified	*	39	0	M+H-H2O	C39H67O9P	2.44532	1.34967	0.0105615	0.194634	-1.56515	0.337944	5077.25	15024	8057.14	7579.14	7517.16	3817.58	1556.19	1936.31	21362.3	14703.4	16149.8	24134.5	6880.2	6913.63
13.20_383.3397n	406.329	13.1976	pos	N-Stearoyl Valine	HMDB0241952				14809077		SIPMISGYHBUSIB-UHFFFAOYSA-N	Organic acids and derivatives	Carboxylic acids and derivatives	Amino acids, peptides, and analogues	*	55.7	82.3	M+H, M+Na	C23H45NO3	-0.593864	1.34343	0.0159618	0.227901	-0.272121	0.828101	49912.3	60273.2	43201.3	48384.6	51495	49120.6	54270.7	53001.7	66804.9	54913.3	65320	69296.1	54965.9	50339
0.79_359.0427m/z	359.043	0.794433	neg	Wedelolactone	HMDB0259891	48360	LMPK12090046	C10541	5281813		XQDCKJKKMFWXGB-UHFFFAOYSA-N	Phenylpropanoids and polyketides	Isoflavonoids	Coumestans	*	36.6	0	M+FA-H	C16H10O7	5.72386	1.33734	0.0104269	0.193411	0.8611	1.81642	20774.3	11436.9	22073.7	12044.8	18379.8	22836.4	28483.7	20827.6	20458.6	8807.08	10279.6	6756.14	9506.01	12814.3
6.10_459.1666m/z	459.167	6.1032	neg	Garcinone C	HMDB0029511	806512			44159808	76996-27-5	HLOCLVMUASBDDP-UHFFFAOYSA-N	Organoheterocyclic compounds	Benzopyrans	1-benzopyrans	*	38.9	0	M+FA-H	C23H26O7	1.19598	1.33723	1.82931e-05	0.0101636	27.3968	1.76713e+08	7486.96	4.23678e-05	7822.02	5511.86	6923.2	7014.29	12060.8	5589.57	4.23678e-05	4.23678e-05	4.23678e-05	4.23678e-05	4.23678e-05	4.23678e-05
4.60_420.1803m/z	420.18	4.59843	pos	Heptadeacsphing-6E-enine 4R-sufate			LMSP01080072		10959895		KZLMQHDECHRBBR-DIKSDDLMSA-N	Lipids and lipid-like molecules	Sphingolipids	Sphingoid bases	*	41.2	16.6	M+K	C17H35NO6S	-3.48496	1.32989	0.0111601	0.198232	1.12786	2.18535	17711.8	8104.79	21342.5	10002.6	12032.2	14751.3	27270.5	20871.4	2021.47	11558.5	5889.26	7824.99	9055.46	12279
6.46_533.1235m/z	533.124	6.45567	neg	Sulfisoxazole	HMDB0014408	43339		C07318	5344	127-69-5	NHUHCSRWZMLRLA-UHFFFAOYSA-N	Benzenoids	Benzene and substituted derivatives	Benzenesulfonamides	*	36.6	0	2M-H	C11H13N3O3S	-8.81759	1.3268	0.0237003	0.256754	27.8342	2.39298e+08	10138.5	4.23678e-05	3820.42	8242.16	26987.2	12554.5	9082.7	144.233	4.23678e-05	4.23678e-05	4.23678e-05	4.23678e-05	4.23678e-05	4.23678e-05
12.52_563.2651m/z	563.265	12.5243	pos	Protoporphyrin IX	HMDB0000241			C02191			KSFOVUSSGSKXFI-UJJXFSCMSA-N	Organoheterocyclic compounds	Tetrapyrroles and derivatives	Porphyrins	**	45.7	0	M+H	C34H34N4O4	-0.312459	1.32534	0.0375574	0.299729	1.00185	2.00257	23861.4	11915.4	31964.2	16048.6	36680.4	25868.3	5944.78	26661.9	4971.73	12614.2	17631.2	17159.6	8630.45	10485.2
7.39_473.1822m/z	473.182	7.38643	neg	Heteroflavanone B	HMDB0040836	52961	LMPK12140479		42608026	151171-29-8	CQHDMUSZBYPHBO-UHFFFAOYSA-N	Phenylpropanoids and polyketides	Flavonoids	Flavans	*	38.8	0	M+FA-H	C24H28O7	1.0527	1.32221	2.74387e-05	0.013067	13.4048	10845.3	7319.86	0.674934	6345.45	5763.91	7586.53	8715.26	11273.3	4234.66	1.69519	4.23678e-05	4.23678e-05	4.23678e-05	2.35424	4.23678e-05
0.78_228.0978m/z	228.098	0.77895	pos	Deoxycytidine	HMDB0000014	3367		C00881	13711	951-77-9	CKTSBUTUHBMZGZ-SHYZEUOFSA-N	Nucleosides, nucleotides, and analogues	Pyrimidine nucleosides	Pyrimidine 2'-deoxyribonucleosides	***	63.1	62.1	M+H	C9H13N3O4	-0.317103	1.31535	0.00609897	0.162837	-0.334851	0.792866	37054.8	46735.2	41117.4	27004.6	33175.9	37296.1	40909.4	42825.3	46081.3	42202.1	46586.8	48077.1	45343	52121.2
0.84_345.0016m/z	345.002	0.84175	pos	Minodronic acid	HMDB0254739	322136			130956		VMMKGHQPQIEGSQ-UHFFFAOYSA-N	Organoheterocyclic compounds	Imidazopyridines	Unclassified	*	38.7	0	M+Na	C9H12N2O7P2	1.39293	1.30867	0.0134548	0.213874	0.556826	1.47103	31418.5	21358.2	26410.6	28987.9	28982.5	32771.4	38174.5	33184	25733.4	14049	13134.4	27574	18356.2	29302
7.38_334.2140n	335.221	7.38242	pos	(ent-16betaOH)-16,17-Dihydroxy-9(11)-kauren-19-oic acid	HMDB0036760	91786			74029190	55483-24-4	QSJIZGQGHYROGD-UHFFFAOYSA-N	Phenylpropanoids and polyketides	Stilbenes	Unclassified	***	64.9	69.9	M+H-H2O, M+H	C20H30O4	-1.24775	1.30293	0.0216496	0.250279	-0.668098	0.629336	18208.4	28932.7	18131.2	18754.2	13408.1	16712.1	26382.7	15862	33179.5	27929.3	41132.5	23417.7	31769	16168
6.66_473.2370m/z	473.237	6.65527	neg	6-Deoxypenciclovir	HMDB0247053				128517		WJOWACPJSFGNRM-UHFFFAOYSA-N	Organoheterocyclic compounds	Imidazopyrimidines	Purines and purine derivatives	*	41.5	18.7	2M-H	C10H15N5O2	-1.75374	1.30162	0.0113136	0.198715	0.513434	1.42744	32677.5	22892.3	27552.6	27539.2	24264.1	38317.1	39040.9	39350.9	24536.4	21363.3	24863.7	21533.4	27438.3	17618.5
9.17_452.3503n	470.384	9.17005	pos	5beta-cholestan-3alpha,7alpha,12alpha,24(S),27-pentol	HMDB0062416	844504			56927969		CPKBPCHJXMSTOE-CJKJGBPISA-N	Lipids and lipid-like molecules	Steroids and steroid derivatives	Bile acids, alcohols and derivatives	*	44.2	24.6	M+NH4, M+Na	C27H48O5	0.169416	1.29386	0.00177357	0.0980719	-0.663462	0.631361	14199.9	22490.9	18105.4	17942.4	14158.8	13580.1	11311.8	10100.8	19027.7	23561.6	28003.2	21139.5	24265.1	18948.3
1.81_327.0758m/z	327.076	1.81317	neg	1-Methyl-1,3-dihydro-2H-benzimidazole-2-thione		457613			1522244		CDNHLXOFELOEOL-UHFFFAOYSA-N	Unclassified	Unclassified	Unclassified	*	38.3	0	2M-H	C8H8N2S	4.52547	1.28387	0.0123027	0.206835	9.66804	813.524	8829.91	10.8539	2295.54	4661.24	6396.04	10395.3	22225.6	7005.78	4.23678e-05	4.23678e-05	7.67465	53.3396	4.10908	4.23678e-05
11.45_590.4256m/z	590.426	11.4486	pos	IC202A			LMFA08020182		70678744		BVRULQCEMCYBAM-UHFFFAOYSA-N	Lipids and lipid-like molecules	Fatty Acyls	Fatty amides	*	37.7	0	M+NH4	C27H52N6O7	3.61182	1.2829	0.0335964	0.288481	0.915344	1.88602	22045.2	11688.8	5580.76	20214.4	23521.5	23731.8	28180.9	31042.1	13072.8	17665.2	8230.88	4036.27	16553.9	10573.5
2.56_403.0679m/z	403.068	2.56468	pos	4-Methoxybenzyl O-(2-sulfoglucoside)	HMDB0034754	90180			74083239		LILHPDXFNPJEJC-UHFFFAOYSA-N	Organic oxygen compounds	Organooxygen compounds	Carbohydrates and carbohydrate conjugates	*	41.4	18.2	M+Na	C14H20O10S	2.40467	1.27648	0.0420872	0.311285	0.270323	1.20608	61573.9	51053	64582.9	49660.5	60371.5	59140.5	68027.5	67660.8	44760.6	65000.8	40524	56150.1	50790.7	49092.1
4.81_151.1119m/z	151.112	4.80777	pos	VERBENONE	HMDB0259787	320053		C09913	29025	18309-32-5	DCSCXTJOXBUFGB-UHFFFAOYSA-N	Lipids and lipid-like molecules	Prenol lipids	Monoterpenoids	*	44.9	27.4	M+H	C10H14O	0.730768	1.27335	0.00902841	0.184607	2.76759	6.80968	9891.07	1452.5	4446.76	6800.95	7528.34	11327.7	22140.8	7101.93	1394.69	1360.29	1653.91	1334.19	1278.4	1693.53
7.63_445.1872m/z	445.187	7.62875	neg	Estrone glucuronide	HMDB0004483	7063	LMST05010011	C11133	115255	2479-90-5	FJAZVHYPASAQKM-JBAURARKSA-N	Lipids and lipid-like molecules	Steroids and steroid derivatives	Steroidal glycosides	*	46.6	39	M-H	C24H30O8	0.941315	1.26687	0.0260563	0.264319	27.8284	2.38333e+08	10097.6	4.23678e-05	23879.4	11119.8	17714.3	7284.22	401.09	187.034	4.23678e-05	4.23678e-05	4.23678e-05	4.23678e-05	4.23678e-05	4.23678e-05
3.94_502.1499m/z	502.15	3.94182	pos	1-Methyl-5-(4-benzoyl)pyrrole-2-acetic acid 2-(theophylline-7-yl)ethyl ester	HMDB0254399				3080969		TYIRBZOAKBEYEJ-UHFFFAOYSA-N	Organic oxygen compounds	Organooxygen compounds	Carbonyl compounds	*	37.9	0	M+K	C24H25N5O5	2.6311	1.2645	5.95805e-05	0.0206695	27.3525	1.71365e+08	7260.35	4.23678e-05	11468.6	9647.97	5284.2	6355.2	6143.32	4662.84	4.23678e-05	4.23678e-05	4.23678e-05	4.23678e-05	4.23678e-05	4.23678e-05
0.79_245.0592m/z	245.059	0.794483	pos	2-(5-Fluoropentyl)-2-methylmalonic acid	HMDB0254798	410987			57514438		BOYGOAXVKOOCKN-UHFFFAOYSA-N	Lipids and lipid-like molecules	Fatty Acyls	Fatty acids and conjugates	*	37.2	0	M+K	C9H15FO4	3.031	1.26009	0.00118272	0.0859778	0.902853	1.86976	15808.2	8454.68	13565.5	11174.9	15358	15704.9	20124.5	18921.5	8128.5	10021.9	6538.82	6062.09	7843.02	12133.7
0.81_308.0358n	289.018	0.8104	neg	Sulisobenzone	HMDB0258614	43340			19988		CXVGEDCSTKKODG-UHFFFAOYSA-N	Benzenoids	Benzene and substituted derivatives	Benzophenones	*	37.1	0	M-H2O-H, M-H	C14H12O6S	1.14866	1.26001	0.0454955	0.321514	-0.806488	0.571772	14790	25867	9466.16	22996.7	27696.3	14541.8	6528.86	7510.14	24108.8	32235.1	38209.2	23930.8	20566.2	16151.6
9.86_372.3106m/z	372.311	9.85635	pos	3-Methyltridecanoylcarnitine	HMDB0240825						GYBMNPBDDHOMRM-UHFFFAOYSA-N	Lipids and lipid-like molecules	Fatty Acyls	Fatty acid esters	***	68.8	48.7	M+H	C21H41NO4	-0.516852	1.25763	0.00992593	0.189806	0.724792	1.65266	22965.1	13895.8	24062.2	18986.7	17601.6	22775.7	23625.7	30738.4	7575.45	9819.89	17247.9	11307.4	15762	21662.1
10.40_450.3578m/z	450.358	10.3954	pos	23S,25,26-Trihydroxyvitamin D3	HMDB0060134				73946449		GDIBDBUYVICGLY-SAJDXCSNSA-N	Lipids and lipid-like molecules	Steroids and steroid derivatives	Vitamin D and derivatives	***	68.2	45.7	M+NH4	C27H44O4	0.1155	1.25691	0.0191324	0.240813	0.796005	1.73629	24910.6	14347	24709.2	33686.4	31162.7	24626.1	11337.1	23942.1	5934.71	11150.4	15640.9	16044.3	20403	16909.1
0.79_166.0854m/z	166.085	0.794483	pos	Oxidized-adrenal-ferredoxin	HMDB0062515	43322			838	329-65-7	UCTWMZQNUQWSLP-UHFFFAOYSA-N	Benzenoids	Phenols	Benzenediols	**	57.5	0	M+H-H2O	C9H13NO3	-4.72104	1.25514	9.29481e-05	0.0257545	0.987078	1.98217	13984.5	7055.19	14719.4	13912.9	17133.3	12079.8	15983.4	10078.5	6768.49	6100.88	7308.82	7646.03	8214.85	6292.05
0.69_243.0387m/z	243.039	0.685783	neg	Nitrofurazone	HMDB0014480	43276		C08042	5447130	59-87-0	IAIWVQXQOWNYOU-FPYGCLRLSA-N	Organoheterocyclic compounds	Furans	Nitrofurans	*	36.9	0	M+FA-H	C6H6N4O4	8.10508	1.25114	0.0198993	0.243647	0.756612	1.68952	22513.3	13325.3	18149.1	15713.3	30238.4	18606.9	19199.7	33172.2	13686.6	15638.4	13284	8186.07	10641	18515.5
0.75_262.1890n	263.196	0.746283	pos	1,4,10,13-Tetraoxa-7,16-diazacyclooctadecane	HMDB0244223	458479			72805		NLMDJJTUQPXZFG-UHFFFAOYSA-N	Organic nitrogen compounds	Organonitrogen compounds	Amines	*	38.7	0	M+H-H2O, M+H	C12H26N2O4	-0.913736	1.2407	0.0169591	0.231834	0.595129	1.51061	25423.7	16830.1	31576.9	26345.6	28997.5	22255.9	26421.9	16944.2	15126.7	26056.9	16960.9	12276	18660.4	11899.6
9.99_263.2005m/z	263.201	9.99107	pos	12-Hydroxyheptadeca-5,8,10-trienoic acid	HMDB0244447				1414		KUKJHGXXZWHSBG-UHFFFAOYSA-N	Lipids and lipid-like molecules	Fatty Acyls	Fatty acids and conjugates	***	73.4	80.1	M+H-H2O	C17H28O3	-0.193445	1.2395	0.0266252	0.26574	-1.67806	0.312503	4644.43	14862.1	3801.25	7190.99	2351.2	4695.33	5871.23	3956.59	17811.7	23444.7	27469	7123.78	9330.74	3992.38
10.43_1155.4885m/z	1155.49	10.432	neg	Netupitant	HMDB0255552						WAXQNWCZJDTGBU-UHFFFAOYSA-N	Phenylpropanoids and polyketides	Flavonoids	Flavonoid glycosides	*	37.3	0	2M-H	C30H32F6N4O	-0.289243	1.23945	0.00696872	0.169327	-2.06004	0.239809	2634.98	10987.8	4097.42	3023.47	3913.63	2354.94	741.247	1679.16	14995.6	17509.4	9878.17	14556.5	7450.59	1536.61
5.82_301.0729m/z	301.073	5.82337	neg	Isoferreirin	HMDB0029491	48007	LMPK12050503		156743	76656-75-2	VODZWHSRITUHNI-UHFFFAOYSA-N	Phenylpropanoids and polyketides	Isoflavonoids	O-methylated isoflavonoids	**	57.9	0	M-H	C16H14O6	3.89	1.22917	0.0248657	0.260332	27.7044	2.18704e+08	9266.02	4.23678e-05	19132.9	8567.26	19768.9	7414.65	568.905	143.52	4.23678e-05	4.23678e-05	4.23678e-05	4.23678e-05	4.23678e-05	4.23678e-05
1.96_365.1356m/z	365.136	1.9591	neg	Semilepidinoside B	HMDB0033108				131751376		ASPNXCICLVYQCJ-UHFFFAOYSA-N	Organic oxygen compounds	Organooxygen compounds	Carbohydrates and carbohydrate conjugates	***	50.9	53.9	M-H	C17H22N2O7	0.369821	1.2255	0.00782986	0.178827	-0.284447	0.821056	39684.2	48333.1	44247.7	41161.4	33962.6	38028.9	42164.8	38540	55544.2	47382.6	50853.8	39438.4	48249.2	48530.6
9.70_396.3108m/z	396.311	9.70235	pos	Nordeoxycholic acid	HMDB0304947				314374		PLRQOCVIINWCFA-UHFFFAOYSA-N	Lipids and lipid-like molecules	Steroids and steroid derivatives	Bile acids, alcohols and derivatives	**	58.3	0.39	M+NH4	C23H38O4	-0.173209	1.22548	0.0261358	0.264319	0.799689	1.74073	23090.6	13264.9	20490.9	25120.3	12771.5	24063.9	28084.8	28012.4	8089.15	6992.55	11756.5	8173.66	23063.5	21514.3
6.26_817.2857m/z	817.286	6.25955	neg	Ezetimibe	HMDB0015108	43875			150311	163222-33-1	OLNTVTPDXPETLC-XPWALMASSA-N	Organoheterocyclic compounds	Lactams	Beta lactams	*	38	0	2M-H	C24H21F2NO3	-6.00657	1.22363	0.0322441	0.285134	27.6058	2.04251e+08	8653.66	4.23678e-05	1825.86	4144.9	22398.6	9184.7	14367.9	4.23678e-05	4.23678e-05	4.23678e-05	4.23678e-05	4.23678e-05	4.23678e-05	4.23678e-05
10.84_432.2989n	433.306	10.843	pos	N-arachidonoyl glutamine		75508	LMFA08020126		52922070		XNAYJICFDMIWEO-HUDVFFLJSA-N	Lipids and lipid-like molecules	Fatty Acyls	Fatty amides	*	39.1	0	M+H, M+Na	C25H40N2O4	0.203183	1.2225	0.0237492	0.257138	-1.23343	0.425306	7173.72	16867.2	8328.04	4405.33	7745.44	7698.71	7781.01	7083.79	27619.1	21995.3	22328.6	13024.9	13002.2	3232.94
0.63_487.2134m/z	487.213	0.627433	pos	Glucosylgalactosyl hydroxylysine	HMDB0000585	5567			122304	32448-35-4	UTIRJVJBKWSIOX-SRMFCGEKSA-N	Lipids and lipid-like molecules	Fatty Acyls	Fatty acyl glycosides	*	38.4	0	M+H	C18H34N2O13	0.128759	1.2217	0.0416444	0.309853	-0.847935	0.555579	12497.4	22494.4	6301.89	8749.46	3770.86	13369.6	21555.6	21237.1	20876.1	17529.5	13636.5	26294.1	22237.8	34392.4
1.11_180.0667m/z	180.067	1.11267	neg	L-Tyrosine	HMDB0000158	34		C00082	6057	60-18-4	OUYCCCASQSFEME-QMMMGPOBSA-N	Organic acids and derivatives	Carboxylic acids and derivatives	Amino acids, peptides, and analogues	***	75.1	96.1	M-H	C9H11NO3	0.422396	1.21443	0.00665999	0.166629	-0.432674	0.740887	24202.9	32667.4	25524.7	21031.6	28878.2	25303.9	24566.8	19911.9	30585.3	37098.6	31179.4	30057.5	40503.2	26580.4
9.39_387.1818m/z	387.182	9.39472	neg	Pyranomammea B	HMDB0039029	93635			131752522		IWAUBOJXTGEZNN-UHFFFAOYSA-N	Phenylpropanoids and polyketides	Coumarins and derivatives	Pyranocoumarins	*	40.4	10.2	M-H	C22H28O6	1.18659	1.213	0.007663	0.177826	27.5524	1.96837e+08	8339.57	4.23678e-05	11804.8	14774.5	13596.5	7802.58	1442.51	616.579	4.23678e-05	4.23678e-05	4.23678e-05	4.23678e-05	4.23678e-05	4.23678e-05
1.11_282.0060m/z	282.006	1.1094	pos	Thioxanthine monophosphate	HMDB0060876				57322338		OAOIXPPCQSJBRI-UHFFFAOYSA-N	Organoheterocyclic compounds	Imidazopyrimidines	Purines and purine derivatives	*	38.9	0	M+NH4	C5H5N4O5PS	1.2891	1.20451	0.000772554	0.0693541	-0.445954	0.734099	19413.1	26444.8	22146.3	19097.5	21820	16829.3	17312.5	19273.1	27306.5	27470.2	28380.2	22902.8	29693.4	22915.9
5.01_467.0455m/z	467.045	5.00515	neg	2,2,2-Trifluoro-N-(2-nitrophenyl)acetamide	HMDB0247856				3805891		RDHSJZAEIBUROF-UHFFFAOYSA-N	Benzenoids	Benzene and substituted derivatives	Nitrobenzenes	*	37.4	0	2M-H	C8H5F3N2O3	4.94911	1.19903	0.0203315	0.245475	8.73878	427.204	9474.17	22.1772	4868.97	5933.14	2903.46	10096	7122.74	25920.7	4.23678e-05	21.1717	4.23678e-05	32.4249	69.9286	9.5377
0.76_349.0545m/z	349.055	0.761983	pos	Phosphoribosyl formamidocarboxamide	HMDB0001439	3506		C04734	166760	13018-54-7	ABCOOORLYAOBOZ-KQYNXXCUSA-N	Nucleosides, nucleotides, and analogues	Imidazole ribonucleosides and ribonucleotides	1-ribosyl-imidazolecarboxamides	**	48.6	0	M+H-H2O	C10H15N4O9P	0.406736	1.19822	0.0233575	0.255176	1.29266	2.44979	14682.6	5993.41	8579.15	7588.44	8242.89	15766	24220	23699.2	3100.96	5463.75	7668.85	5770.6	6269.18	7687.13
9.54_417.2288m/z	417.229	9.54262	neg	9'-Carboxy-gamma-tocotrienol	HMDB0012869				53481537	17-15-2	QSRURDPJEKTSFH-ODPFLYRHSA-N	Lipids and lipid-like molecules	Prenol lipids	Monoterpenoids	*	48.1	46.4	M+FA-H	C23H32O4	1.36786	1.18531	0.0230599	0.254871	5.40125	42.2608	7910.11	187.174	6350.26	2289.6	7930.57	8592.64	20979	1318.63	591.38	124.018	184.038	4.23678e-05	223.606	4.23678e-05
5.68_597.2469m/z	597.247	5.68407	neg	Niraxostat	HMDB0255624	450986			449035		AETHRPHBGJAIBT-UHFFFAOYSA-N	Organoheterocyclic compounds	Azoles	Pyrazoles	*	39.5	4.58	2M-H	C16H17N3O3	0.26887	1.18338	0.0204317	0.245633	0.943446	1.92312	16602.1	8632.91	22112.4	8374.5	11905	16365.9	25575	15279.8	7512.73	9890.56	3663.85	7619.74	12900.1	10210.5
1.11_417.0743m/z	417.074	1.1094	pos	Isopongachromene		48501	LMPK12110065		44257584		CKTFYXPCWPPHAT-UHFFFAOYSA-N	Lipids and lipid-like molecules	Polyketides	Flavonoids	*	37.4	0	M+K	C22H18O6	2.07735	1.17749	0.00469702	0.146167	-0.700477	0.615369	12111.3	19681.3	13261.9	10170.5	16690.7	10839.6	10339	11365.9	19805.1	25455	19309.6	17919.9	23100.5	12497.9
0.78_278.1234m/z	278.123	0.77895	pos	N-(1-Deoxy-1-fructosyl)proline	HMDB0038493	93171			131752381	29118-61-4	GSFRYAKUDPPHHG-MKSMHYHASA-N	Organic acids and derivatives	Carboxylic acids and derivatives	Amino acids, peptides, and analogues	**	60.5	26	M+H	C11H19NO7	-0.268646	1.17398	0.0247288	0.260165	-0.548803	0.683587	18198	26621.3	12359.8	29170.7	18051.2	18521.1	17057.1	14027.9	34274.7	21884.9	31110.1	21255.4	25756.6	25446.1
1.26_446.1958n	491.194	1.26057	neg	CAY10625		45600			44306972	137346-42-0	BGABGXIVKDUNFQ-UHFFFAOYSA-N	Unclassified	Unclassified	Unclassified	*	38.3	0	M-H, M+FA-H	C25H26N4O4	0.779052	1.1726	0.0289472	0.273586	-0.820819	0.56612	11693.2	20655	17635.4	11700.1	16875.1	7462.39	9689.07	6797.21	20458.6	29742.4	19749.7	18335.2	26713.2	8930.93
7.39_419.2056m/z	419.206	7.38643	neg	Armillane	HMDB0035779	91018				126006-69-7	XAJFXYLALLZDAD-UHFFFAOYSA-N	Lipids and lipid-like molecules	Prenol lipids	Diterpenoids	*	43.6	29.8	M-H	C23H32O7	-4.6605	1.17232	0.0100118	0.190094	-1.13251	0.45612	6512.86	14278.8	7503.85	6675.89	4302.49	5978.23	8159.71	6456.97	17148.5	13383.3	21736.5	10611.4	17585.3	5208.03
3.21_404.1618m/z	404.162	3.21443	pos	Topotecan	HMDB0015164	68881		C11158	60700	119413-54-6	UCFGDBYHRUNTLO-QHCPKHFHSA-N	Alkaloids and derivatives	Camptothecins	Unclassified	*	46.3	43.8	M+H-H2O	C23H23N3O5	3.13873	1.16805	0.0160949	0.228249	-1.82808	0.281639	3163.75	11233.4	2242.59	7877.24	4119.24	3097.74	896.422	749.297	20467.9	8548.56	17781.6	8889.41	5543.99	6168.85
6.26_392.1567m/z	392.157	6.25955	neg	6'-Apiosyllotaustralin	HMDB0034207	89777			131751537	170033-25-7	NUKMOAMTVXXKKG-UHFFFAOYSA-N	Organic oxygen compounds	Organooxygen compounds	Carbohydrates and carbohydrate conjugates	*	38.5	0	M-H	C16H27NO10	1.21228	1.16737	0.0034915	0.128508	7.41626	170.812	6627.81	38.8019	3783.24	5310.67	12572.5	7312.03	9952.53	835.954	4.23678e-05	4.23678e-05	4.23678e-05	97.7811	102.851	32.1794
5.70_595.3488m/z	595.349	5.70422	pos	Stercobilin	HMDB0240259						DEEUSUJLZQQESV-BQUSTMGCSA-N	Organoheterocyclic compounds	Tetrapyrroles and derivatives	Bilirubins	*	49	50.7	M+H	C33H46N4O6	-0.419498	1.16285	0.0299022	0.277343	-2.49689	0.177158	1828.37	10320.5	3651.13	2509.67	767.964	1288.41	2401.16	351.863	11681.4	20977.6	536.504	16407.3	11040.7	1279.76
0.71_122.9758m/z	122.976	0.709183	neg	Carbonothioic O,S-acid	HMDB0249640				117859		HDFRDWFLWVCOGP-UHFFFAOYSA-N	Organosulfur compounds	Thiocarbonyl compounds	Organic thiocarbonic acid derivatives	*	38.6	0	M+FA-H	CH2O2S	0.348187	1.16268	0.0172553	0.232796	-1.385	0.382889	4715.77	12316.3	4009.58	5776.58	4053.96	4413.42	7106.39	2934.7	10852.5	5192.06	4900.52	20064.9	16857.3	16030.4
10.16_263.1640m/z	263.164	10.1632	pos	(1R,7S,13S,15S)-2,15-Dihydroxy-7-methyl-6-oxabicyclo[11.3.0]hexadeca-3,11-dien-5-one	HMDB0242339				2430		KQNZDYYTLMIZCT-UHFFFAOYSA-N	Phenylpropanoids and polyketides	Macrolides and analogues	Unclassified	*	55	78.1	M+H-H2O	C16H24O4	-0.47025	1.15631	0.038874	0.304098	-0.72411	0.60537	14735.5	24341.3	17979.8	16954.5	11447.6	13847.7	18245.2	9938.09	34373.9	23689.1	36230.1	17778.1	12846.9	21129.5
1.15_137.9929n	182.991	1.15083	neg	Polymaleic acid, sodium salt	HMDB0303272	324496			6435859		VRVKOZSIJXBAJG-ODZAUARKSA-M	Organic acids and derivatives	Carboxylic acids and derivatives	Dicarboxylic acids and derivatives	*	39.9	0	M-H, M+FA-H	C4H3NaO4	0.106659	1.15602	0.0352344	0.293023	-0.507126	0.703623	20818.3	29587.4	18886.9	29535.7	26954.1	22278	13897.5	13357.9	34732.5	32509.4	35814.7	25953.6	27622.1	20891.9
2.71_290.1600m/z	290.16	2.71215	pos	Caryophyllen-beta	HMDB0304653		LMFA07070087		71296139		BSVHAXJKBCWVDA-UHFFFAOYSA-N	Lipids and lipid-like molecules	Fatty Acyls	Fatty acid esters	**	62.6	23	M+H	C13H23NO6	0.66592	1.14454	0.00652904	0.165841	-1.48711	0.356727	3835.47	10751.8	4081.61	8107.7	3076.11	3539.43	2154.77	2053.17	12781.9	6891.29	18605.2	9909.43	9337.41	6985.63
7.06_506.1788n	524.213	7.06063	pos	4,6,2',4'-Tetramethoxychalcone 2'-beta-glucoside			LMPK12120280				HVISDQXFNJPZDE-NYPBKLTOSA-N	Lipids and lipid-like molecules	Polyketides	Flavonoids	*	39.3	0	M+NH4, M+Na	C25H30O11	-0.0281159	1.1386	0.000883066	0.074267	7.96079	249.136	5936.02	23.8264	5360.05	4646.21	5220.98	6388.71	11644.3	2355.9	4.23678e-05	4.23678e-05	26.9064	59.6425	56.4096	4.23678e-05
5.33_244.0230m/z	244.023	5.33325	neg	trifluoroquinolone	HMDB0259209				20095355		IOAPNOOBYBCVEH-UHFFFAOYSA-N	Organoheterocyclic compounds	Quinolines and derivatives	Quinolones and derivatives	*	38	0	M+FA-H	C9H4F3NO	1.52152	1.13782	0.00351963	0.12934	1.83635	3.57104	9839.03	2755.22	6993.14	8811.24	4041.74	10262.5	11402.6	17522.9	2560.98	2668.05	2588.75	2916.72	2841.36	2955.48
10.25_431.2076m/z	431.208	10.2459	neg	Euglobal Ib	HMDB0030033	86675			73819907	77844-94-1	DRQVGVASTZKOLP-UHFFFAOYSA-N	Organoheterocyclic compounds	Benzopyrans	1-benzopyrans	*	38.3	0	M+FA-H	C23H30O5	0.211527	1.13769	0.015978	0.227901	27.4965	1.89353e+08	8022.5	4.23678e-05	14049	15770.3	11187.9	6721.42	406.316	4.23678e-05	4.23678e-05	4.23678e-05	4.23678e-05	4.23678e-05	4.23678e-05	4.23678e-05
5.11_557.1469m/z	557.147	5.10693	neg	Dehydrophthalocyanine	HMDB0250957				129638085		ZETFJCOBPQNMFJ-UHFFFAOYSA-N	Organoheterocyclic compounds	Isoindoles and derivatives	Isoindoles	*	36.1	0	M+FA-H	C32H16N8	-2.13396	1.13769	0.0486984	0.328779	-1.38615	0.382583	4850.56	12678.4	1731.85	5541.7	1254.65	5487.81	6798.31	8289.03	8853.11	5983.61	7776.64	23142.5	22927	7387.74
4.15_355.1182n	356.125	4.15238	pos	7,8-Dimethoxy-3-methyl-1-(4-nitrophenyl)-5H-2,3-benzodiazepin-4-one	HMDB0249845				10473374		NSYNMKLIUFYQED-UHFFFAOYSA-N	Organoheterocyclic compounds	Benzodiazepines	Unclassified	*	37.8	0	M+H, M+NH4	C18H17N3O5	3.92196	1.12096	0.029033	0.274231	-0.309899	0.806698	32921.9	40810.7	32294.5	39668.9	26316	33006	34896.8	31349.3	41174.5	41081.9	39428.4	31820.5	51229.4	40129.5
6.26_399.1535m/z	399.153	6.25955	neg	1-(2-Hydroxyethoxy)methyl-5-methyluracil	HMDB0247200				72358		ATKOZYBRBNGECU-UHFFFAOYSA-N	Organoheterocyclic compounds	Diazines	Pyrimidines and pyrimidine derivatives	*	38.8	0	2M-H	C8H12N2O4	3.34104	1.11488	0.0019873	0.103744	27.0382	1.37815e+08	5838.93	4.23678e-05	3711.77	4864.76	10459.8	6357.09	8711.26	928.926	4.23678e-05	4.23678e-05	4.23678e-05	4.23678e-05	4.23678e-05	4.23678e-05
10.44_457.2362m/z	457.236	10.4404	neg	[(1R)-1-(hydroxymethyl)-2-phosphonooxy-ethyl] (5Z,8Z,11Z,14Z)-icosa-5,8,11,14-tetraenoate			LMGP10050039		53481444		BDCFJMBXZCIVRH-NZRYSPDRSA-N	Lipids and lipid-like molecules	Glycerophospholipids	Glycerophosphates	*	39.8	8.6	M-H	C23H39O7P	0.2803	1.11344	0.00697895	0.169327	-0.979403	0.50719	7165.61	14128.1	9714.01	5468.16	8284.99	6740.69	6753.75	6032.02	15959.3	20528.6	14012.2	16875.2	10110	7283.03
4.71_137.0478n	138.055	4.71275	pos	m-Aminobenzoic acid	HMDB0001891	6374			7419	99-05-8	XFDUHJPVQKIXHO-UHFFFAOYSA-N	Benzenoids	Benzene and substituted derivatives	Benzoic acids and derivatives	*	46.8	37.3	M+H-H2O, M+H	C7H7NO2	0.861274	1.11199	0.00668367	0.166806	-1.06966	0.47643	6425.52	13486.8	7361.82	7292.21	8379.45	6169.62	4902.09	4447.92	19052.9	16628	17272.5	8562.94	11823.2	7581.15
0.74_125.0179m/z	125.018	0.741033	neg	Ethyl methylphosphonofluoridate	HMDB0252055				160541		RIYPSXBGLXRZNJ-UHFFFAOYSA-N	Organic acids and derivatives	Organic phosphonic acids and derivatives	Phosphonic acid esters	*	42.3	20	M-H	C3H8FO2P	4.39305	1.09947	0.0162226	0.228595	-0.298374	0.813168	32663.9	40168.7	36333.3	35235.7	31301.7	31558.4	36929.8	24624.7	34278.8	43990.3	35282.8	42847.5	40380.3	44232.7
5.20_413.1435m/z	413.144	5.19828	neg	6-Amino-9H-purine-9-propanoic acid	HMDB0029939	86603			255450	4244-47-7	QXAYJKFBMWMARF-UHFFFAOYSA-N	Organoheterocyclic compounds	Imidazopyrimidines	Purines and purine derivatives	*	38.7	0	2M-H	C8H9N5O2	-1.09799	1.09947	0.00488234	0.148173	4.21951	18.6294	6377.03	342.311	2969.42	4576.96	5734.01	7361.1	14084.3	3536.46	15.8991	4.23678e-05	4.23678e-05	677.906	919.56	440.499
1.38_276.0177m/z	276.018	1.38165	neg	2,5-Dioxopyrrolidin-1-yl 2-(acetylthio)acetate	HMDB0247382						FLCQLSRLQIPNLM-UHFFFAOYSA-N	Organoheterocyclic compounds	Pyrrolidines	Pyrrolidones	*	50.5	61.7	M+FA-H	C8H9NO5S	-2.93933	1.09891	0.0498661	0.33135	-0.294938	0.815107	39083.2	47948.5	33720.8	43105.7	39623.6	36742.2	44430	36876.8	60066.7	53491.6	52629.8	44416.5	39320.1	37766.5
6.54_306.1941n	307.201	6.54097	pos	ROXATIDINE	HMDB0257317						BCCREUFCSIMJFS-UHFFFAOYSA-N	Organoheterocyclic compounds	Piperidines	Benzylpiperidines	*	46.5	41.2	M+H, M+Na	C17H26N2O3	-0.873512	1.09788	0.00504804	0.149677	-1.87015	0.273546	2346.96	8579.78	2076.99	2445.57	1627	2632.06	4183.64	1116.52	11231.5	7783.55	4944.98	10307.7	14160.7	3050.28
11.18_497.3021m/z	497.302	11.1847	pos	3beta,4alpha-dihydroxy-26-methoxyergosta-7,24(28)-dien-6-one			LMST01031143		139588631		XCLVYKBMNARCLH-YARWUZRLSA-N	Lipids and lipid-like molecules	Steroids and steroid derivatives	Sterols	*	43.4	27.6	M+K	C29H46O4	-1.56501	1.09763	0.0398467	0.30603	1.1056	2.15188	16695.6	7758.61	5237.89	22907.7	24861.3	18027.3	11043.7	18095.7	4148.45	3702.72	4742.7	18471.4	6316.27	9170.16
9.17_416.3289n	417.336	9.17005	pos	Calcitriol	HMDB0001903	6382	LMST03020258	C01673	5280453	32222-06-3	GMRQFYUYWCNGIN-NKMMMXOESA-N	Lipids and lipid-like molecules	Steroids and steroid derivatives	Vitamin D and derivatives	*	56.3	86.7	M+H-H2O, M+H	C27H44O3	-0.461434	1.09377	0.0117208	0.202302	-0.630266	0.646057	12661.1	19597.5	17722.5	17032.2	12895.8	11052.4	9369.95	7893.79	21508.1	21173.2	25269.2	15619.3	18436.9	15578.3
12.20_586.4246m/z	586.425	12.2042	pos	Cer(d16:1/18:2(10E,12Z)+=O(9))	HMDB0289862						QYSVVOPPSMBPSS-WQAWXJNVSA-N	Unclassified	Unclassified	Unclassified	*	38.3	0.556	M+K	C34H61NO4	2.58385	1.09374	0.0436305	0.315446	0.638857	1.5571	24675.6	15847.2	40451.1	24134.7	20219.2	23119.5	14613.4	25515.6	15558.8	12051.7	13359.9	19457.7	13630.8	21024.3
10.16_364.3208m/z	364.321	10.1632	pos	Hexadecadienylcarnitine	HMDB0253126				132278029		HVWOQFIBWDACQA-UHFFFAOYSA-N	Lipids and lipid-like molecules	Fatty Acyls	Fatty acids and conjugates	**	58.1	0	M+H-H2O	C23H43NO3	-0.652383	1.09269	0.041043	0.309304	1.17052	2.25093	16324.2	7252.2	10642.9	16400.6	13831.8	18034.1	8442.74	30592.9	1968.46	13406.1	2470.53	14179.2	6442.42	5046.48
6.65_473.1277m/z	473.128	6.64902	neg	trans-Caffeic acid [apiosyl-(1->6)-glucosyl] ester	HMDB0033694	89479			131751480		LULOGYYPGZOKQW-DUXPYHPUSA-N	Phenylpropanoids and polyketides	Cinnamic acids and derivatives	Hydroxycinnamic acids and derivatives	*	37.8	0	M-H	C20H26O13	-4.94291	1.08641	0.00187239	0.101365	27.0512	1.39065e+08	5891.89	4.23678e-05	8152.14	7695.35	9775.24	6242.63	2599.5	886.494	4.23678e-05	4.23678e-05	4.23678e-05	4.23678e-05	4.23678e-05	4.23678e-05
9.30_538.3210m/z	538.321	9.30318	neg	Leu-Arg-Asn-Arg	HMDB0304803	181313			22702886		PFUDAVBUJIYNMF-UHFFFAOYSA-N	Organic acids and derivatives	Carboxylic acids and derivatives	Amino acids, peptides, and analogues	*	38.6	0	M-H2O-H	C22H43N11O6	-1.59324	1.08452	0.00312394	0.122311	-2.38831	0.191006	1346.17	7047.81	4.23678e-05	4055.86	228.812	1660.93	937.267	1194.18	5629.28	2466.64	4537.07	9155.85	10623.7	9874.26
3.83_782.1349m/z	782.135	3.83462	neg	6-Hydroxy flavin adenine dinucleotide	HMDB0011612				5287546		BJSUUWFQAMLNKU-OKXKTURISA-N	Nucleosides, nucleotides, and analogues	Flavin nucleotides	Unclassified	*	46.9	43.9	M-H2O-H	C27H33N9O16P2	0.903097	1.08437	0.0343018	0.289787	-0.185289	0.879473	53947.7	61341	55721.3	55384.1	52509.5	54788.5	51678.8	53603.9	68622.3	55160.7	55451.2	67268.1	53756.6	67786.9
6.25_511.1141m/z	511.114	6.2536	pos	cefuroxime axetil	HMDB0249787				3379942		KEJCWVGMRLCZQQ-UHFFFAOYSA-N	Organoheterocyclic compounds	Lactams	Beta lactams	*	37.3	0	M+H	C20H22N4O10S	2.22753	1.08396	0.000497871	0.0599692	26.8918	1.24519e+08	5275.6	4.23678e-05	3728.37	5524.56	7505.23	6121.69	7777.52	996.21	4.23678e-05	4.23678e-05	4.23678e-05	4.23678e-05	4.23678e-05	4.23678e-05
10.30_530.2516m/z	530.252	10.3043	pos	8-desoxy-19,20-epoxycytochalasin C			LMPK11000023				ABSZCAQHXWKEEY-NILIJMHGSA-N	Lipids and lipid-like molecules	Polyketides	Cytochalasins	*	37.6	0	M+Na	C30H37NO6	0.518691	1.06791	0.0328042	0.286377	-0.54556	0.685125	16017.4	23378.8	18576	14131.8	18389	16079.7	11627.2	17300.7	18801.1	34149.3	15428.9	28090.3	22889.3	20914
0.86_318.1199m/z	318.12	0.85875	pos	4-Nitrophenyl 4-guanidinobenzoate	HMDB0246537	453483			30744		CFOQGBUQTOGYKI-UHFFFAOYSA-N	Phenylpropanoids and polyketides	Depsides and depsidones	Unclassified	*	38.6	0	M+NH4	C14H12N4O4	0.63838	1.06637	0.0259601	0.264319	-0.572985	0.672225	15338.5	22817.5	13858.4	15165.4	17536.1	16420.1	16974	12076.9	22677.9	30799.5	24222.9	19858	27742.6	11604.1
4.44_547.1025m/z	547.103	4.44232	neg	Dimethylmyleran	HMDB0251403				5937		JDZNTUQRMDAIRO-UHFFFAOYSA-N	Organic acids and derivatives	Organic sulfonic acids and derivatives	Organosulfonic acids and derivatives	*	36.9	0	2M-H	C8H18O6S2	1.50819	1.06339	0.00679363	0.167557	26.9904	1.33329e+08	5648.87	4.23678e-05	2773.73	1897.24	5512.64	8072.85	12575.4	3061.37	4.23678e-05	4.23678e-05	4.23678e-05	4.23678e-05	4.23678e-05	4.23678e-05
11.03_548.2979m/z	548.298	11.0326	pos	PG(20:5(5Z,8Z,11Z,14Z,17Z)/0:0)		80018	LMGP04050030		52927453		UBJZUYNJJSKNCQ-MTVYBJJPSA-N	Lipids and lipid-like molecules	Glycerophospholipids	Glycerophosphoglycerols	*	38.1	0	M+NH4	C26H43O9P	-0.656384	1.06269	0.00513193	0.150633	-1.05166	0.482413	5525.78	11454.5	8151.29	4543.35	5760.25	5181.46	4086.78	5431.55	12059.9	15667.2	10503.2	15211.4	9947.9	5337.22
7.79_604.3261m/z	604.326	7.79207	pos	3-O-acetylecdysone 2-phosphate		57633	LMST01010188		23657836		MYOZIWALDKJCBG-KXCOSXAXSA-N	Lipids and lipid-like molecules	Steroids and steroid derivatives	Sterols	*	38.6	0	M+NH4	C29H47O10P	2.7673	1.06212	0.00983748	0.18956	0.696094	1.62011	17559.3	10838.3	14091.3	18647.3	11310.1	16185.2	20995.1	24127	9591.49	13773.9	8163.49	10550.9	13317.6	9632.72
6.86_490.1838n	508.218	6.85972	pos	5-Hydroxy-7,4'-dimethoxy-6,8-di-C-prenylflavanone 5-O-galactoside		53049	LMPK12140572		42608074		AQXMPPOEJPDCFL-UHFFFAOYSA-N	Lipids and lipid-like molecules	Polyketides	Flavonoids	*	39.5	0	M+NH4, M+Na	C25H30O10	-0.128017	1.05923	0.000300976	0.0454291	26.8075	1.17452e+08	4976.18	4.23678e-05	3132.91	5250.64	6083.36	5230.55	8295.45	1864.15	4.23678e-05	4.23678e-05	4.23678e-05	4.23678e-05	4.23678e-05	4.23678e-05
0.83_288.0647m/z	288.065	0.825783	pos	N-(3-Methyl-1,1-dioxo-1,4-thiazinan-4-yl)-1-(5-nitro-2-furanyl)methanimine	HMDB0255486						ARFHIAQFJWUCFH-UHFFFAOYSA-N	Organoheterocyclic compounds	Furans	Nitrofurans	*	37.6	0	M+H	C10H13N3O5S	-0.596712	1.0537	0.0421785	0.311566	0.682297	1.60469	18179.2	11328.8	21121.4	11352.8	13220.9	15412.2	28281.8	19685.9	17331.9	14096.9	8677.71	7675.71	10717.9	9472.41
0.83_448.0172m/z	448.017	0.827467	neg	CDP	HMDB0001546	6313		C00112	6132	63-38-7	ZWIADYZPOWUWEW-XVFCMESISA-N	Nucleosides, nucleotides, and analogues	Pyrimidine nucleotides	Pyrimidine ribonucleotides	**	43.4	0	M+FA-H	C9H15N3O11P2	2.0926	1.05323	0.000521911	0.0604545	0.614965	1.53152	14587.4	9524.76	14865.9	11901.4	12141.4	16443.8	16239.6	15932.2	8921.17	9917.56	8742.24	8375.19	9095.25	12097.2
4.61_351.0700m/z	351.07	4.60645	neg	4-Methylumbelliferone glucuronide	HMDB0240464			C11584	91553		ARQXEQLMMNGFDU-JHZZJYKESA-N	Phenylpropanoids and polyketides	Coumarins and derivatives	Coumarin glycosides	**	43.7	0	M-H	C16H16O9	-6.02568	1.0528	0.00977181	0.18939	-1.44501	0.367289	3926.45	10690.3	1342.88	3507.68	2656.25	4516.43	8558.39	2977.05	13315.3	18391.4	9552.14	7323.88	9846.49	5712.82
11.20_369.2700n	392.259	11.2037	pos	N-Arachidonyl Maleimide		45064			25021164		GZNZRHSGGQUYAP-DOFZRALJSA-N	Unclassified	Unclassified	Unclassified	*	37.4	0	M+H, M+Na	C24H35NO2	8.70886	1.05229	0.00291599	0.118545	1.20424	2.30415	9572.01	4154.24	6483.7	5778.38	13248	8403.4	11593.3	11925.3	3962.61	6655.54	4261.99	4136.05	2942.23	2967.02
1.05_240.1090m/z	240.109	1.04575	pos	Dihydrobiopterin	HMDB0000038	5106		C02953	119055	6779-87-9	FEMXZDUTFRTWPE-DZSWIPIPSA-N	Organoheterocyclic compounds	Pteridines and derivatives	Pterins and derivatives	**	56.4	0	M+H	C9H13N5O3	-0.380432	1.04255	0.0368285	0.297154	-0.312786	0.805086	30953.2	38447.1	28711.5	26304.1	30829.5	28898.7	40281.1	30694.4	41542.4	29552.6	44805.3	36307.7	43580.6	34894
14.66_404.3158m/z	404.316	14.664	pos	3-hydroxy-4-methylene-2-(n-eicos-11'-yn-19'-enyl)but-2-enolide			LMPK03000094		155530561		LXFGLBCGRKKMRK-UHFFFAOYSA-N	Lipids and lipid-like molecules	Polyketides	Annonaceae acetogenins	*	41.5	12.7	M+NH4	C25H38O3	-0.424466	1.04243	0.040309	0.306987	-0.796034	0.57593	9206.24	15985	6855.8	9171.23	12236.3	8668.06	7878.88	10427.1	13896.4	13752	13222.5	29159.1	9678.56	16201.4
7.20_489.1774m/z	489.177	7.19912	neg	indole-3-acetyl-alanine	HMDB0304378						FBDCJLXTUCMFLF-UHFFFAOYSA-M	Organic acids and derivatives	Carboxylic acids and derivatives	Amino acids, peptides, and analogues	*	38.3	0	2M-H	C13H13N2O3-	-1.18861	1.04226	6.6699e-05	0.0210327	26.714	1.1008e+08	4663.86	4.23678e-05	3201.85	4041.99	4440.31	4752.02	8040.25	3506.75	4.23678e-05	4.23678e-05	4.23678e-05	4.23678e-05	4.23678e-05	4.23678e-05
1.76_370.0693m/z	370.069	1.76327	neg	PYR-41	HMDB0256938				2856906		ARGIPZKQJGFSGQ-UHFFFAOYSA-N	Benzenoids	Benzene and substituted derivatives	Benzoic acids and derivatives	*	38.1	0.979	M-H	C17H13N3O7	3.17658	1.04194	0.00314613	0.12282	1.20318	2.30247	9582.24	4161.72	10075.6	4848.28	7566.11	10043.6	13751.5	11208.4	2375.34	4501.48	2056.59	5076.63	5299.12	5661.17
0.76_371.1925m/z	371.193	0.761983	pos	17-dimethylarsinoyl-9Z-heptadecenoic acid			LMFA00000031		101857689		QLUKWCNWKNZIQN-ARJAWSKDSA-N	Lipids and lipid-like molecules	Fatty Acyls	Other Fatty Acyls	*	37.8	0	M+H-H2O	C19H37AsO3	-0.118982	1.03968	0.00455522	0.143395	2.21627	4.64691	6872.33	1478.9	8107.79	7045.09	5079.67	5711.03	12686.8	2603.62	651.09	3326.48	663.71	1971.15	4.23678e-05	2261
8.18_483.1336m/z	483.134	8.18355	neg	2-Amino-5-nitrobenzophenone		1570			15681	1775-95-7	PZPZDEIASIKHPY-UHFFFAOYSA-N	Unclassified	Unclassified	Unclassified	*	37.3	0	2M-H	C13H10N2O3	5.29709	1.02002	0.0373055	0.298843	27.1845	1.52529e+08	6462.32	4.23678e-05	1374.05	2737.81	621.506	8003.69	18274.9	7761.96	4.23678e-05	4.23678e-05	4.23678e-05	4.23678e-05	4.23678e-05	4.23678e-05
0.79_434.0875m/z	434.087	0.794433	neg	Delphinidin 3-xyloside	HMDB0301665				134775899		WIEYMFHXYNRELM-MJKGWSOKSA-O	Phenylpropanoids and polyketides	Flavonoids	Flavonoid glycosides	*	38.1	0	M-H	C20H19O11+	4.64658	1.01727	0.0166811	0.230601	1.32634	2.50765	10252.7	4088.57	8981.7	6634.67	5933.58	7838.11	17101.9	15026.2	2178.73	1975.4	1927.65	5115.95	5569.35	7764.33
7.92_399.1817m/z	399.182	7.9224	neg	Tephrowatsin A		329372	LMPK12020160	C09970	442542		ADIMMCHZVYYGPW-MSOLQXFVSA-N	Lipids and lipid-like molecules	Polyketides	Flavonoids	*	38.8	0	M+FA-H	C22H26O4	1.15617	1.01646	9.58107e-05	0.0257545	4.05925	16.6708	5042.46	302.472	3692.95	8307.5	3696.88	5046.6	5865.98	3644.89	523.277	628.669	444.133	4.23678e-05	218.755	4.23678e-05
3.94_500.1352m/z	500.135	3.93937	neg	Monohydroxydiacetyltaxine	HMDB0254859				129848971		BHSZEESVWOFUCX-UHFFFAOYSA-N	Benzenoids	Phenol esters	Unclassified	*	37.4	0	M-H	C28H23NO8	0.283785	1.01358	0.000329849	0.047343	7.1557	142.587	4971.13	34.8638	7953.84	7680.1	4042.4	3919.06	3646.82	2584.54	3.74229	105.801	4.23678e-05	4.23678e-05	99.6397	4.23678e-05
1.01_364.0654m/z	364.065	1.01382	pos	[(2R,5R)-5-(2-Amino-6-oxo-1H-purin-9-yl)-3,4-dihydroxyoxolan-2-yl]methyl dihydrogen phosphate	HMDB0257693				135400774		RQFCJASXJCIDSX-UHFFFAOYSA-N	Nucleosides, nucleotides, and analogues	Purine nucleotides	Purine ribonucleotides	**	56.7	0	M+H	C10H14N5O8P	0.234481	1.00986	0.00995131	0.189806	1.21347	2.31895	9893.19	4266.24	8599.71	5467.36	6988.87	8733.39	15677.8	13892	2648.02	5526.81	4431.04	6573.23	2181.55	4236.8
6.26_365.1372m/z	365.137	6.25955	neg	Zoniporide	HMDB0260043	330295			6433110		GDXBRVCQGGKXJY-UHFFFAOYSA-N	Organoheterocyclic compounds	Quinolines and derivatives	Unclassified	*	37.2	0	M+FA-H	C17H16N6O	1.24666	1.00679	0.00390824	0.135028	26.7926	1.16243e+08	4924.95	4.23678e-05	2629.84	3754.61	9526.61	5715.56	7277.98	645.095	4.23678e-05	4.23678e-05	4.23678e-05	4.23678e-05	4.23678e-05	4.23678e-05
3.68_304.1755m/z	304.176	3.68173	pos	Pimelylcarnitine	HMDB0013328						NTBUXPPQHCFLOM-LLVKDONJSA-N	Lipids and lipid-like molecules	Fatty Acyls	Fatty acid esters	***	61.8	77.6	M+H	C14H25NO6	0.205337	1.00365	0.0414056	0.3096	-0.944246	0.519701	6571.49	12644.7	3532.76	15842.9	7588.46	6605.87	3926.17	1932.81	14491.2	9014.84	10583.5	14717	18571	8490.94

## Sheet: MDG-vs-CG-diff-metabolites
ID	m/z	Retention time (min)	Ion mode	Metabolites	HMDB	METLIN	Lipidmaps	kegg	PubChem	CAS	InChIKey	Super Class	Class	Sub Class	level	Score	Fragmentation Score	Adducts	Formula	Mass Error (ppm)	VIP	P-value	adj.P-value	log2(FC)	FC	average(MDG)	average(CG)	MDG_1	MDG_2	MDG_3	MDG_4	MDG_5	MDG_6	CG_1	CG_2	CG_3	CG_4	CG_5	CG_6
10.30_501.2852n	502.292	10.3043	pos	LysoPE(20:4(5Z,8Z,11Z,14Z)/0:0)	HMDB0011517	46715	LMGP02050009		42607465	652149-09-2	ROPRRXYVXLDXQO-XSQXPFHXSA-N	Lipids and lipid-like molecules	Glycerophospholipids	Glycerophosphoethanolamines	***	74.8	90.7	M+H, M+Na, M+H-H2O	C25H44NO7P	-0.718194	27.9767	0.010246	0.189154	-0.897728	0.536731	8.69704e+06	1.62037e+07	1.10291e+07	1.19247e+07	6.29479e+06	1.09402e+07	5.49032e+06	6.50321e+06	1.75157e+07	2.38838e+07	1.46268e+07	1.92767e+07	1.14299e+07	1.04892e+07
0.72_118.0861m/z	118.086	0.715617	pos	3-Amino-3-methylbutanoic acid	HMDB0245806	449944			2760933		NFQAIWOMJQWGSS-UHFFFAOYSA-N	Organic acids and derivatives	Carboxylic acids and derivatives	Amino acids, peptides, and analogues	***	64.7	59.9	M+H	C5H11NO2	-0.913793	18.7793	0.00259776	0.11416	0.614017	1.53051	8.65807e+06	5.65696e+06	1.0318e+07	9.64449e+06	9.03122e+06	6.04115e+06	7.15208e+06	9.76148e+06	5.0235e+06	4.74444e+06	5.67414e+06	5.8162e+06	5.77071e+06	6.91279e+06
10.41_569.2753n	570.283	10.4142	pos	PS(22:6(4Z,7Z,10Z,13Z,16Z,19Z)/0:0)		78840	LMGP03050013		52926281		FZUFCKYWYUGORZ-SLSDLOGTSA-N	Lipids and lipid-like molecules	Glycerophospholipids	Glycerophosphoserines	*	49.6	50.1	M+H, M+Na, M+H-H2O	C28H44NO9P	-0.187734	17.9876	0.00448077	0.141787	-1.25234	0.419767	2.06588e+06	4.92149e+06	2.66412e+06	2.92821e+06	2.31747e+06	1.99104e+06	1.15961e+06	1.33482e+06	6.14307e+06	6.99983e+06	6.01027e+06	4.65694e+06	3.24011e+06	2.47869e+06
10.29_525.2855n	524.278	10.285	neg	LysoPE(22:6(4Z,7Z,10Z,13Z,16Z,19Z)/0:0)	HMDB0011526	62310	LMGP02050013		52925132		XEVRBOQZSXWGQO-PAUXXPOVSA-N	Lipids and lipid-like molecules	Glycerophospholipids	Glycerophosphoethanolamines	***	62	92.9	M-H, 2M-H	C27H44NO7P	-0.150671	16.8068	0.0221586	0.242074	-1.11063	0.463092	2.50143e+06	5.40158e+06	3.29238e+06	4.10926e+06	2.86238e+06	2.89425e+06	1.05677e+06	793527	6.55167e+06	6.9691e+06	8.39083e+06	4.51752e+06	3.65468e+06	2.32571e+06
10.44_544.2684m/z	544.268	10.4404	neg	PS(20:4(5Z,8Z,11Z,14Z)/0:0)		46725	LMGP03050007		42607475		XHWSRRGLFMDBOB-RRJHOXOUSA-N	Lipids and lipid-like molecules	Glycerophospholipids	Glycerophosphoserines	***	69.3	68.3	M-H	C26H44NO9P	0.569015	15.0636	0.00188582	0.102577	-1.18733	0.439114	1.48282e+06	3.37685e+06	1.72327e+06	2.3e+06	1.26226e+06	1.51573e+06	883643	1.21202e+06	3.87275e+06	4.75389e+06	3.39064e+06	3.7156e+06	2.59312e+06	1.93512e+06
1.04_307.0838n	306.077	1.04432	neg	Glutathionate(1-)	HMDB0062697				745		RWSXRVCMGQZWBV-UHFFFAOYSA-N	Organic acids and derivatives	Carboxylic acids and derivatives	Amino acids, peptides, and analogues	***	65.9	66.5	M-H, 2M-H	C10H17N3O6S	0.0463632	14.6209	0.000688858	0.0686945	0.771475	1.70701	4.10553e+06	2.4051e+06	5.17447e+06	4.05173e+06	4.60718e+06	3.89811e+06	3.58634e+06	3.31538e+06	2.99206e+06	2.94941e+06	1.90945e+06	1.88754e+06	2.01545e+06	2.67666e+06
13.31_829.5598n	830.567	13.3061	pos	PC(22:6(4Z,7Z,10Z,13Z,16Z,19Z)/18:2(9Z,12Z))	HMDB0008730	60176	LMGP01012109	C00157	52923695		CRMDHZOCLIGOEV-HVMWQSSESA-N	Lipids and lipid-like molecules	Glycerophospholipids	Glycerophosphocholines	*	52.3	76.6	M+H, M+Na	C48H80NO8P	-2.82295	14.5041	0.000513507	0.0622989	0.626083	1.54337	4.5404e+06	2.94188e+06	4.2292e+06	3.77806e+06	5.2102e+06	4.34576e+06	5.01086e+06	4.66833e+06	2.62009e+06	3.5243e+06	2.87718e+06	3.2427e+06	1.99858e+06	3.38841e+06
10.35_588.3309m/z	588.331	10.3547	neg	LysoPC(20:4(8Z,11Z,14Z,17Z)/0:0)	HMDB0010396	61706	LMGP01050140	C04230	53480469		GOMVPVRDBLLHQC-VEJNOCSESA-N	Lipids and lipid-like molecules	Glycerophospholipids	Glycerophosphocholines	***	74.6	99	M+FA-H	C28H50NO7P	0.361501	12.7166	0.0192817	0.228191	-0.761592	0.589845	2.13275e+06	3.61577e+06	2.39003e+06	2.36473e+06	2.47864e+06	2.70911e+06	1.25538e+06	1.59859e+06	4.97931e+06	3.44218e+06	4.50876e+06	3.6769e+06	3.51594e+06	1.57154e+06
10.42_523.2702n	568.268	10.4182	neg	4-Chloro-2-nitrobenzylalcohol	HMDB0249542				1959		HIYAVKIYRIFSCZ-UHFFFAOYSA-N	Organoheterocyclic compounds	Benzoxazoles	Unclassified	*	52.4	68.8	M+FA-H, 2M-H	C29H37N3O6	3.6952	11.6593	0.00682052	0.163573	-1.31886	0.40085	836403	2.08657e+06	1.15152e+06	1.2831e+06	949489	767373	425595	441344	2.41196e+06	3.07943e+06	2.80668e+06	1.8609e+06	1.42629e+06	934163
13.12_830.5660m/z	830.566	13.124	pos	PC(P-18:1(9Z)/22:6(4Z,7Z,11E,13Z,15E,19Z)-2OH(10S,17))	HMDB0289821						AAMJUAFRMSXPFR-AHVXNCBBSA-N	Unclassified	Unclassified	Unclassified	*	53.5	86.1	M+H-H2O	C48H82NO9P	-4.0135	10.7264	0.00956568	0.185703	0.96787	1.95595	2.22698e+06	1.13857e+06	1.99957e+06	1.84298e+06	2.35091e+06	1.75478e+06	2.24382e+06	3.16984e+06	694275	1.15898e+06	1.75833e+06	2.0922e+06	533792	593838
0.70_129.0426n	147.076	0.699383	pos	pyrrolidone carboxylic acid	HMDB0257001						DQAKJEWZWDQURW-UHFFFAOYSA-N	Organoheterocyclic compounds	Pyrrolidines	Pyrrolidones	***	65.4	52.7	M+H, M+NH4	C5H7NO3	-0.169995	10.221	0.00171491	0.100295	0.595575	1.51107	2.45813e+06	1.62674e+06	2.53595e+06	2.69877e+06	2.36331e+06	2.53249e+06	2.48731e+06	2.13095e+06	1.66308e+06	1.17929e+06	2.02205e+06	1.26596e+06	1.36343e+06	2.26664e+06
0.73_134.1175m/z	134.117	0.731017	pos	Diisopropanolamine	HMDB0251354	44741			8086	110-97-4	LVTYICIALWPMFW-UHFFFAOYSA-N	Organic nitrogen compounds	Organonitrogen compounds	Amines	**	63.7	25.7	M+H	C6H15NO2	-0.547702	8.40899	0.0359522	0.285846	-1.04664	0.484093	677714	1.39997e+06	627131	678816	759691	774102	601604	624941	2.50139e+06	1.66616e+06	1.70649e+06	1.20753e+06	912535	405697
5.69_513.2761n	514.283	5.68688	pos	MG(LTE4/0:0/0:0)	HMDB0260480						CYDYAFSODZMADY-VJBFNVCUSA-N	Unclassified	Unclassified	Unclassified	*	51.4	62.5	M+H, M+Na, M+K	C26H43NO7S	0.0973383	8.03039	0.0102057	0.189083	1.40793	2.65356	972921	366648	674644	1.10007e+06	611249	1.84177e+06	925372	684414	338781	410932	239854	393131	466926	350262
7.83_499.2965n	500.304	7.83058	pos	Taurochenodesoxycholic acid	HMDB0000951	57991	LMST05040005	C05465		516-35-8	BHTRKEVKTKCXOH-BJLOMENOSA-N	Lipids and lipid-like molecules	Steroids and steroid derivatives	Bile acids, alcohols and derivatives	***	61.6	96.2	M+H, M+Na, M+NH4, M+K, M+H-H2O	C26H45NO6S	-0.451189	7.87307	0.0131763	0.201223	-1.33861	0.395401	396502	1.00278e+06	139083	123013	153322	926348	399987	637261	766540	1.03839e+06	435459	995943	1.41458e+06	1.3658e+06
0.72_342.1161n	365.105	0.715617	pos	Melibiose	HMDB0000048				6602503	13299-20-2	DLRVVLDZNNYCBX-CQHUIXDMSA-N	Organic oxygen compounds	Organooxygen compounds	Carbohydrates and carbohydrate conjugates	***	66.1	40.8	M+H-H2O, M+NH4, M+Na	C12H22O11	-0.365377	7.83567	0.0439908	0.306163	2.94841	7.71896	796669	103209	1.54193e+06	1.62185e+06	1.17537e+06	214667	174335	51858	28801.3	33303.8	68228.9	116493	58336.8	314093
6.26_330.1681n	329.161	6.25955	neg	tetranor-PGFM	HMDB0258925	36188			3082337	23109-94-6	IGRHJCFWWOQYQE-UHFFFAOYSA-N	Lipids and lipid-like molecules	Fatty Acyls	Eicosanoids	*	52.9	68	M-H, M+FA-H, 2M-H	C16H26O7	0.691484	7.73982	0.036302	0.287004	7.62791	197.802	677990	3427.62	237465	164377	951134	1.95141e+06	448520	315030	3277.03	4430.34	3586.29	3259.06	2932.29	3080.71
12.42_304.2403n	303.233	12.4241	neg	Eicosatetraenoic acid	HMDB0251721	356740			53436588		IQLUYYHUNSSHIY-UHFFFAOYSA-N	Lipids and lipid-like molecules	Fatty Acyls	Fatty acids and conjugates	**	58.1	22.9	M-H, M+FA-H, 2M-H	C20H32O2	0.0985732	7.44976	0.0260791	0.256197	-0.911648	0.531578	659808	1.24123e+06	549296	1.08842e+06	327273	791833	691850	510176	1.60785e+06	1.52109e+06	1.5693e+06	1.49254e+06	689202	567357
10.29_477.2855n	476.278	10.2933	neg	LysoPE(0:0/18:2(9Z,12Z))	HMDB0011477	62265	LMGP02050041		53480926		SVRBKLJIDJHADS-USWSLJGRSA-N	Lipids and lipid-like molecules	Glycerophospholipids	Glycerophosphoethanolamines	***	76.3	98	M-H, 2M-H	C23H44NO7P	-0.167417	6.85032	0.0250514	0.252566	-0.733649	0.601381	698766	1.16194e+06	619646	744710	334240	995969	729787	768244	1.15625e+06	1.32844e+06	680488	1.18604e+06	1.75132e+06	869085
5.68_580.2565m/z	580.256	5.68407	neg	Streptomycin	HMDB0015214	2496		C00413	19649	57-92-1	UCSJYZPVAKXKNQ-HZYVHMACSA-N	Benzenoids	Benzene and substituted derivatives	Diphenylacetonitriles	*	40.7	11	M-H	C21H39N7O12	-3.33926	6.19007	0.00450812	0.141787	1.44612	2.72475	531556	195084	433833	669603	376791	908886	478329	321892	191945	253032	121478	164017	259245	180786
10.30_1025.5625m/z	1025.56	10.3016	neg	PI(PGJ2/22:3(10Z,13Z,16Z))	HMDB0277828						QXIJFGXNLMJQEF-PYSMCGAVSA-N	Unclassified	Unclassified	Unclassified	*	49.3	51.1	M+FA-H	C52H85O15P	1.7087	5.9759	0.0224368	0.242315	-1.68616	0.310753	167893	540280	246813	289849	163120	232591	35796.5	39192	653729	904752	847727	463369	274366	97738.3
12.42_403.1581m/z	403.158	12.4241	neg	Sericetin		44599	LMPK12111649		4020240	42438-75-5	BPGVKIFGOXGHPB-UHFFFAOYSA-N	Lipids and lipid-like molecules	Polyketides	Flavonoids	*	41.9	19.2	M-H	C25H24O5	7.54013	5.96633	0.0160336	0.21413	-1.70393	0.30695	150779	491217	109965	332866	36669.9	193145	148904	83123.8	866093	603652	558489	562247	216284	140537
1.09_247.1420n	248.149	1.09353	pos	3-Hydroxybutyrylcarnitine	HMDB0013127					1469900-92-2	UEFRDQSMQXDWTO-BDAKNGLRSA-N	Lipids and lipid-like molecules	Fatty Acyls	Fatty acid esters	***	69.9	87.1	M+H, M+Na	C11H21NO5	0.0821944	5.75548	0.00208098	0.104682	-0.810285	0.570269	362757	636114	343648	189501	442213	300020	425830	475326	475350	516746	693878	793754	715824	621135
0.72_236.1684m/z	236.168	0.715617	pos	(S)-3-Methylthiohexyl butyrate	HMDB0038946	93557			537755	145937-80-0	CPZRKTMCYSRJPH-UHFFFAOYSA-N	Lipids and lipid-like molecules	Fatty Acyls	Fatty acid esters	*	37	0	M+NH4	C11H22O2S	2.29461	5.41097	0.00332535	0.128048	1.13128	2.19052	458857	209474	597722	630815	511675	265204	338871	408857	136144	149485	234131	209038	210658	317386
0.79_470.1439m/z	470.144	0.794483	pos	Normorphine 3-glucuronide	HMDB0255747				14356106		AZRPPLMNKUSBGC-UHFFFAOYSA-N	Alkaloids and derivatives	Morphinans	Unclassified	*	48.9	58.8	M+Na	C22H25NO9	3.93142	5.3016	0.00374438	0.134539	1.5171	2.86214	381072	133142	381972	279557	449900	593128	321992	259880	5912.45	56675.6	79375.1	160744	262118	234027
0.81_307.0837n	330.073	0.810317	pos	Glutathione	HMDB0000125	44		C00051	124886	70-18-8	RWSXRVCMGQZWBV-WDSKDSINSA-N	Organic acids and derivatives	Carboxylic acids and derivatives	Amino acids, peptides, and analogues	***	72.3	93.5	M+Na, M+K	C10H17N3O6S	-0.47199	5.27563	4.77659e-05	0.0213371	0.789077	1.72797	486772	281702	563619	503441	556241	451246	412274	433813	272384	326250	226876	260602	288692	315408
11.96_778.5360m/z	778.536	11.9596	pos	PC(16:0/18:3(6Z,9Z,12Z))	HMDB0007974	59423	LMGP01010598	C00157	24778699	203393-39-9	CNNSEHUKQJCGTE-UPPWDXJYSA-N	Lipids and lipid-like molecules	Glycerophospholipids	Glycerophosphocholines	*	52.6	73	M+Na	C42H78NO8P	0.360417	5.27201	0.011323	0.194	0.832485	1.78075	564359	316922	437539	421159	483106	700156	850642	493554	245277	433552	425460	223644	255502	318099
1.04_333.0940m/z	333.094	1.04432	neg	(S)-a-Amino-2,5-dihydro-5-oxo-4-isoxazolepropanoic acid N2-glucoside	HMDB0029404	86247			131750866	29790-46-3	OURYTICKCZBKFC-UHFFFAOYSA-N	Organic oxygen compounds	Organooxygen compounds	Carbohydrates and carbohydrate conjugates	***	66.2	73.2	M-H	C12H18N2O9	0.252822	5.26242	0.0281153	0.260164	0.637825	1.55598	799899	514080	934177	839782	977729	711084	814557	522063	493221	279495	389208	554841	454184	913529
10.30_978.5701n	979.577	10.3043	pos	PI(TXB2/20:1(11Z))	HMDB0277106						HZLMFCBTKOHFIQ-MKDMZBNVSA-N	Unclassified	Unclassified	Unclassified	*	38.7	1.11	M+H, M+Na	C49H87O17P	2.0661	5.06688	0.0233875	0.24661	-1.23193	0.425749	195769	459822	212076	251040	50852.3	315354	143789	201500	385717	765540	206610	664434	490383	246248
1.03_146.0924m/z	146.092	1.03007	pos	4-Guanidinobutanoic acid	HMDB0003464	6938		C01035	500	463-00-3	TUHVEAJXIMEOSA-UHFFFAOYSA-N	Organic acids and derivatives	Carboxylic acids and derivatives	Amino acids, peptides, and analogues	***	62.9	75.5	M+H	C5H11N3O2	0.245485	4.98094	0.018234	0.222862	2.02909	4.08148	347496	85139.7	549223	349098	680099	168412	100762	237382	124078	49196.9	99678	96673.8	62739.9	78472.1
12.56_379.1582m/z	379.158	12.558	neg	Ecabet	HMDB0015613	316325			65781	86408-72-2	IWCWQNVIUXZOMJ-MISYRCLQSA-N	Lipids and lipid-like molecules	Prenol lipids	Diterpenoids	*	45.4	34.5	M-H	C20H28O5S	-0.714286	4.93198	0.0452668	0.309312	-1.07721	0.473946	258908	546282	279376	538878	67924.1	257146	227022	183103	684739	882511	596588	659761	214666	239427
5.69_513.2760n	496.273	5.68688	pos	Sulfolithocholylglycine	HMDB0002639	6725	LMST05030004	C11301	72222	15324-64-8	FHXBAFXQVZOILS-OETIFKLTSA-N	Lipids and lipid-like molecules	Steroids and steroid derivatives	Bile acids, alcohols and derivatives	*	53.2	74.2	M+H-H2O, M+NH4	C26H43NO7S	-0.00183422	4.75936	0.00515809	0.149335	1.3564	2.56045	331858	129609	345534	505691	322023	433449	213457	170995	171942	223174	76418.9	106808	111323	87990.1
0.70_309.1291m/z	309.129	0.699383	pos	2-Deoxy-2,3-dehydro-n-acetyl-neuraminic acid	HMDB0245680				1553		JINJZWSZQKHCIP-UHFFFAOYSA-N	Organic acids and derivatives	Carboxylic acids and derivatives	Carboxylic acid derivatives	***	66	64.5	M+NH4	C11H17NO8	-0.516817	4.72758	0.0198029	0.230511	1.22089	2.33091	384598	164999	381242	309131	401148	624655	396231	195180	7090.78	40921	174154	140306	270728	356795
7.24_405.1769m/z	405.177	7.2435	neg	1-O-(8R-hydroxy-8-methyl-3Z,9-decadienoyl)-beta-D-glucopyranose			LMFA13010039				VSVRDZASVIUYEH-KETPRWIJSA-N	Lipids and lipid-like molecules	Fatty Acyls	Fatty acyl glycosides	*	43.7	23.1	M+FA-H	C17H28O8	0.6864	4.52212	0.0205326	0.23395	-1.88414	0.270906	69041.9	254856	119207	23345.8	98227.2	68046.3	41243.2	64181.7	207647	206366	187383	334482	533169	60086.8
4.85_344.1474n	343.14	4.8452	neg	Iridotrial glucoside		41169	LMPR0102070024	C11653	443335		MRIFZKMKTDPBHR-MDHPXLNESA-N	Lipids and lipid-like molecules	Prenol lipids	Isoprenoids	*	50.2	55.3	M-H, M+FA-H	C16H24O8	0.798503	4.45434	0.0272619	0.257241	7.60644	194.88	209375	1074.38	105510	99097.1	89601.5	601854	211752	148438	754.212	642.974	739.244	1965.77	1138.98	1205.1
0.78_263.1715m/z	263.172	0.77895	pos	Glutaminylvaline	HMDB0028810	23765			57262456	31189-73-8	MRVYVEQPNDSWLH-XPUUQOCRSA-N	Organic acids and derivatives	Carboxylic acids and derivatives	Amino acids, peptides, and analogues	*	43.5	22.3	M+NH4	C10H19N3O4	0.54159	4.41293	0.0332117	0.277975	2.29599	4.91091	276122	56226.4	554782	333141	490317	57943.6	47243.6	173307	66453.8	43238.8	65596.7	70753.2	45755.4	45560.2
0.75_261.1808m/z	261.181	0.746283	pos	Tiglylcarnitine	HMDB0002366				91825636	64681-36-3	WURBQCVBQNMUQT-OLKPEBQYSA-N	Lipids and lipid-like molecules	Fatty Acyls	Fatty acid esters	**	48	12.9	M+NH4	C12H21NO4	-0.189377	4.40777	0.000118582	0.0339842	3.59611	12.093	160166	13244.4	223522	205788	208974	103945	94035.6	124729	4589.48	16833	14416.1	13691	6378.58	23558.4
0.79_162.0761m/z	162.076	0.794483	pos	Glutamic acid gamma-methyl ester	HMDB0061715	314259			68662	1499-55-4	ZGEYCCHDTIDZAE-BYPYZUCNSA-N	Organic acids and derivatives	Carboxylic acids and derivatives	Amino acids, peptides, and analogues	***	72.5	69	M+H	C6H11NO4	-0.0613224	4.39888	0.0171509	0.218059	0.433154	1.35018	765681	567095	725895	533755	822349	800915	895112	816062	543708	453460	512694	478487	743978	670242
10.43_1090.5513n	1089.54	10.432	neg	Quinoside A	HMDB0040808	95272			15625674	123597-11-5	UCOFFSFKNNIOHI-UHFFFAOYSA-N	Lipids and lipid-like molecules	Prenol lipids	Terpene glycosides	*	36.3	0.929	M-H, M+FA-H	C53H86O23	-4.28349	3.98365	0.0097663	0.187432	-2.98341	0.126446	21900.3	173199	31631	58917.5	13043.1	21755.7	1942.76	4111.54	223903	359217	180895	156196	92164.3	26818
0.60_164.0669m/z	164.067	0.595967	pos	Ammonia aspartate	HMDB0248341				129713638		GOVCRMWFUKQONY-UHFFFAOYSA-N	Organic acids and derivatives	Carboxylic acids and derivatives	Amino acids, peptides, and analogues	*	39.1	16.3	M+NH4	C4H6N2O4	2.11116	3.93116	0.0128694	0.200263	0.756564	1.68946	365733	216479	484365	409490	456027	321606	285099	237814	118943	147993	218885	248174	269224	295656
12.25_427.1581m/z	427.158	12.2471	neg	Crosatoside B	HMDB0039253				131752590		BMZAMCOQJLZXCY-UHFFFAOYSA-N	Organic oxygen compounds	Organooxygen compounds	Carbohydrates and carbohydrate conjugates	*	37.1	0	M-H2O-H	C20H30O11	-6.34396	3.89733	0.00880159	0.180321	-2.32482	0.1996	34966.4	175183	41081.5	60728.2	29229	49476.1	15243.5	14040	228332	214596	282953	236978	50833.6	37402.3
0.79_937.2457n	920.242	0.794483	pos	4-Hydroxydecanoyl-CoA	HMDB0300864						FYFAOTOSCVLZCG-UHFFFAOYSA-N	Unclassified	Unclassified	Unclassified	*	38.6	0	M+H-H2O, M+Na	C31H54N7O18P3S	-0.215049	3.79989	0.00394256	0.137468	0.628223	1.54566	353702	228836	346155	243372	394778	370398	323679	443830	204515	295627	172998	237437	197796	264641
7.24_428.1658n	429.173	7.23663	pos	trans-p-Ferulyl alcohol 4-O-[6-(2-methyl-3-hydroxypropionyl)] glucopyranoside	HMDB0301953				101260573		NUZPXHFCBKVLFX-QCIYUQLOSA-N	Organic oxygen compounds	Organooxygen compounds	Carbohydrates and carbohydrate conjugates	*	38.1	0	M+H, M+Na	C20H28O10	-5.80203	3.64262	0.0215605	0.238896	-1.88091	0.271513	45033.3	165860	70006.2	17251.3	57532.7	42332.6	35227.2	47849.8	148624	129157	118491	200120	357856	40913.7
0.71_165.0404m/z	165.04	0.709183	neg	Erythrose	HMDB0002649			C01796	439574		FMAORJIQYMIRHF-HERZVMAMSA-N	Organic oxygen compounds	Organooxygen compounds	Carbohydrates and carbohydrate conjugates	***	66.3	52.3	M+FA-H	C4H8O4	-0.358335	3.63972	0.00149918	0.0953225	-0.739143	0.599095	166533	277974	149580	167671	139050	169922	164508	208467	240677	217168	311197	364801	227507	306493
6.46_330.1680n	329.161	6.45567	neg	Picrocrocin	HMDB0005796				22833654		WMHJCSAICLADIN-VKSCUUAMSA-N	Organic oxygen compounds	Organooxygen compounds	Carbohydrates and carbohydrate conjugates	***	51.4	60.7	M-H, 2M-H	C16H26O7	0.524764	3.59279	0.0349936	0.283533	7.64566	200.25	145535	726.764	65932.2	40563.6	203470	418396	75336	69509.2	529.017	608.164	548.418	901.944	405.277	1367.77
10.42_520.2682m/z	520.268	10.4182	neg	LysoPS(18:2(9Z,12Z)/0:0)	HMDB0240604	78838	LMGP03050011		52926279	1218913-82-6	HLISFLFEEBTXRV-FRZHUQNDSA-N	Lipids and lipid-like molecules	Glycerophospholipids	Glycerophosphoserines	***	75.6	85.8	M-H	C24H44NO9P	0.27285	3.55162	0.00730213	0.169327	-1.17234	0.443701	91246.8	205649	114314	107229	97733.8	67925.4	65802.8	94475.7	265808	320839	217850	172516	165806	91077.1
10.29_624.2039m/z	624.204	10.285	neg	Dansylglutamyl-glycyl-arginine chloromethyl ketone	HMDB0250847				21947226		LDMSFLLWFAFZAF-UHFFFAOYSA-N	Organic acids and derivatives	Carboxylic acids and derivatives	Amino acids, peptides, and analogues	*	40.6	35.4	M-H	C26H36ClN7O7S	4.15306	3.4063	0.012405	0.197457	-1.48987	0.356044	63010.3	176974	81451.1	105011	70453.2	74517.4	28105.3	18524.5	203800	271122	267746	154049	97060.1	68064.8
0.78_192.0325m/z	192.032	0.77895	pos	2,4-Thiazolidinedicarboxylic acid, 2-methyl-	HMDB0244750				98342		JCAKCGQZNBEITC-UHFFFAOYSA-N	Organic acids and derivatives	Carboxylic acids and derivatives	Amino acids, peptides, and analogues	***	64.5	44.8	M+H	C6H9NO4S	-0.0923213	3.39922	0.00718542	0.168122	0.80054	1.74175	243209	139634	208274	251065	231260	346169	205346	217139	52385.9	145252	99116.4	179599	176960	184494
1.04_1071.7654m/z	1071.77	1.04432	neg	TG(22:5(7Z,10Z,13Z,16Z,19Z)/22:5(4Z,7Z,10Z,13Z,16Z)/22:6(4Z,7Z,10Z,13Z,16Z,19Z))	HMDB0055871				131766371		AHKHMUYVSKEIDX-NQTDZTRZSA-N	Lipids and lipid-like molecules	Glycerolipids	Triradylcglycerols	*	37.8	0	M+FA-H	C69H102O6	-0.392157	3.35379	0.000241025	0.0446374	1.39671	2.63301	139927	53143.4	156632	146272	179886	129980	146816	79974.5	77909.6	63261	30437.2	40307.7	42110.7	64833.9
5.69_558.2471m/z	558.247	5.68688	pos	ibho#22			LMFA13040144		86289900		FUIIPNLIVZGYJM-RHENGWIESA-N	Lipids and lipid-like molecules	Fatty Acyls	Fatty acyl glycosides	*	46.4	37.2	M+K	C28H41NO8	1.46455	3.33036	0.00108771	0.0833762	1.25535	2.38725	154534	64733.1	128144	191699	116660	230903	145000	114798	65592.5	79363.5	43779.5	64952.2	74284.9	60426.1
0.71_527.1024m/z	527.102	0.709183	neg	(-)-Epigallocatechin 3'-glucuronide	HMDB0041638	96001			76970196		CQDATFYRGVZXLF-ZVHNUXTDSA-N	Phenylpropanoids and polyketides	Flavonoids	Flavonoid glycosides	*	40.4	18	M+FA-H	C21H22O13	-3.92403	3.17474	0.0463467	0.311761	5.16406	35.8538	119208	3324.82	234208	277744	175476	11747.1	11477	4593.63	4.23678e-05	4.23678e-05	4.23678e-05	2860.62	2051.58	15036.7
5.11_421.1720m/z	421.172	5.10693	neg	{1-[2-(4-Carbamimidoyl-benzoylamino)-propionyl]-piperidin-4-yloxy}-acetic acid	HMDB0257277				12007072		BHOGTSLQMNCJHA-UHFFFAOYSA-N	Benzenoids	Benzene and substituted derivatives	Benzoic acids and derivatives	*	40.7	8.52	M+FA-H	C18H24N4O5	-2.22101	3.11576	0.0189565	0.226497	-1.60474	0.328795	43382	131943	51916.1	23117.8	50884.5	52142	45285	36946.8	96796	67820.4	81981.5	229042	231585	84430.6
0.81_576.1718m/z	576.172	0.810317	pos	Cartormin	HMDB0035209	90527			131751684		DDYOBOBXPBUGTA-ZZXKWVIFSA-N	Lipids and lipid-like molecules	Prenol lipids	Terpene lactones	*	37.5	0	M+H	C27H29NO13	1.05542	3.09924	4.24535e-05	0.0206386	1.53482	2.89752	108483	37439.9	102735	72714	125685	109806	116566	123390	19295.9	25002.3	25479.1	47019.3	50065.5	57777.3
1.05_132.0245n	150.058	1.04575	pos	3-Methyl sulfolene	HMDB0059667	343032			70941		FAYFWMOSHFCQPG-UHFFFAOYSA-N	Organoheterocyclic compounds	Dihydrothiophenes	Unclassified	*	39.7	3.49	M+H, M+NH4	C5H8O2S	0.23855	3.08966	0.030829	0.27046	-0.157577	0.896529	835317	931723	733421	900868	839582	806180	899571	832279	1.03448e+06	955403	911161	870344	973577	845376
7.84_634.2649m/z	634.265	7.83813	neg	3-[(3-Carboxycyclohexyl)carbamoyl]-4-{3-[4-(4-phenoxybutoxy)phenyl]propoxy}benzoic acid		331197			53394034	712313-33-2	GKPAULTWHHPIHX-UHFFFAOYSA-N	Unclassified	Unclassified	Unclassified	*	38.5	0	M+FA-H	C34H39NO8	-1.48998	2.98915	0.0106704	0.190023	-1.33118	0.397442	56224.4	141466	21027.9	18225.9	21350.2	139067	57276.2	80399	108346	162011	73595.8	132674	204830	167337
11.28_556.2801n	579.269	11.2794	pos	PG(22:6(4Z,7Z,10Z,13Z,16Z,19Z)/0:0)		80004	LMGP04050016		52927439		MGCOSBZSSKOQOR-HBJUBMHUSA-N	Lipids and lipid-like molecules	Glycerophospholipids	Glycerophosphoglycerols	*	48.6	47	M+H, M+Na, M+H-H2O	C28H45O9P	-0.00717713	2.98632	0.0118734	0.1962	-1.20813	0.432831	63737.3	147257	110041	70438.7	56178.4	90461.5	30070.4	25233.2	215393	213141	147618	99762.8	132420	75206.7
0.69_133.0375n	132.03	0.685783	neg	L-Aspartic acid	HMDB0000191	5206		C00049	5960	56-84-8	CKLJMWTZIZZHCS-REOHCLBHSA-N	Organic acids and derivatives	Carboxylic acids and derivatives	Amino acids, peptides, and analogues	***	70.5	77.7	M-H2O-H, M-H	C4H7NO4	-0.00190058	2.97301	0.0271586	0.257241	-0.749795	0.594688	139243	234145	167308	92642.4	176675	98853	162914	137066	253736	382562	174575	161316	247672	185008
11.27_250.1449m/z	250.145	11.2698	neg	3,4-Dimethylethcathinone		96622			82100164		AOXOTNQJKCPNGK-UHFFFAOYSA-N	Unclassified	Unclassified	Unclassified	*	39.8	0	M+FA-H	C13H19NO	0.076625	2.91731	0.00422293	0.139816	0.314329	1.24343	403292	324337	399412	360522	481860	405913	375903	396140	293049	278281	345417	350325	351324	327627
0.84_295.0663m/z	295.066	0.84175	pos	Pyridine N-oxide glucuronide	HMDB0061177				131770061		KITHDEVLYXWSPB-ZBGLXGBJSA-O	Organic oxygen compounds	Organooxygen compounds	Carbohydrates and carbohydrate conjugates	*	47.1	40.7	M+Na	C11H14NO7+	0.31715	2.9076	0.010257	0.189208	-1.28818	0.409467	54577.3	133289	44894.4	59095.3	45787.1	48585.2	54163.6	74938.2	193714	195904	164280	99376.3	97116.5	49341.1
0.79_918.2284m/z	918.228	0.794433	neg	5-Decenoyl-CoA	HMDB0300870						COJZXVHOJVJQAL-UHFFFAOYSA-N	Unclassified	Unclassified	Unclassified	*	38.6	0	M-H	C31H52N7O17P3S	0.338451	2.90664	0.00010595	0.0326749	0.709498	1.63523	164244	100440	164044	174689	183541	152646	181883	128659	107263	119628	79609.7	108188	97556.5	90397.7
2.42_687.1495n	688.157	2.41553	pos	Dephospho-CoA	HMDB0001373	3689	LMFA07050315	C00882	444485	3633-59-8	KDTSHFARGAKYJN-IBOSZNHHSA-N	Nucleosides, nucleotides, and analogues	Purine nucleotides	Purine ribonucleotides	*	57.8	95.4	M+H, M+Na	C21H35N7O13P2S	0.864482	2.90155	0.0047521	0.143067	0.859657	1.81461	170149	93766.5	244084	187667	160230	187529	98375	143010	84965.6	99168.9	67459.7	103987	114929	92088.4
0.79_424.1020m/z	424.102	0.794483	pos	S-(1,2-Dicarboxyethyl)glutathione	HMDB0257378				4411483		PWCIUOASSAHGHI-UHFFFAOYSA-N	Organic acids and derivatives	Carboxylic acids and derivatives	Amino acids, peptides, and analogues	***	70.7	93.8	M+H	C14H21N3O10S	-0.113209	2.85188	0.0352106	0.28385	0.880176	1.8406	197337	107214	256732	112222	297998	169498	125120	222455	10208.1	129158	84979.4	142071	143664	133201
6.60_530.2739m/z	530.274	6.59568	neg	1-(2-methoxy-tetradecanyl)-sn-glycero-3-phosphoserine			LMGP03060004		137323940		IIMDTAKPHKFRFY-ITIDOPETSA-N	Lipids and lipid-like molecules	Glycerophospholipids	Glycerophosphoserines	*	42.2	16.8	M+FA-H	C21H44NO9P	0.701215	2.83334	0.0182415	0.222862	1.97135	3.92135	106168	27074.3	99514.3	113616	5212.13	188791	163943	65930.4	52736.6	36905.3	7255.9	17775.2	36394.2	11378.4
0.71_413.1109m/z	413.111	0.709183	neg	chlorogenic acid methyl ester; Methyl chlorogenate		985117			6476139		MZNIJRAPCCELQX-AWOKGZDASA-N	Unclassified	Unclassified	Unclassified	*	37.4	0	M+FA-H	C17H20O9	5.3567	2.76797	0.013109	0.201153	-1.56187	0.338713	37595.7	110996	10022.6	16473	26687.4	39045.4	47650.5	85695.4	164838	180364	109275	98986.6	67246.5	45264.9
0.79_1071.7660m/z	1071.77	0.794433	neg	(1R,5R,6R,7S)-6-Methyl-1,3,7-tris(3-methylbut-2-enyl)-5-(2-methyl-1-oxopropyl)-6-(4-methylpent-3-enyl)bicyclo[3.3.1]nonane-2,4,9-trione	HMDB0260093				22969135		GQRREYKSPJMLAW-UHFFFAOYSA-N	Lipids and lipid-like molecules	Prenol lipids	Monoterpenoids	*	36.7	0	2M-H	C35H52O4	0.114864	2.74801	0.000133022	0.0341105	1.05809	2.08217	111113	53363.8	77075.1	111614	128147	122183	130075	97581.1	57766.8	66445.9	33894.9	60127.9	55607.3	46340.1
7.83_464.2828m/z	464.283	7.83058	pos	Fluocortin butyl	HMDB0252350				21872759		XWTIDFOGTCVGQB-UHFFFAOYSA-N	Lipids and lipid-like molecules	Steroids and steroid derivatives	Pregnane steroids	*	38.4	0	M+NH4	C26H35FO5	4.73394	2.7465	0.0125013	0.197795	-1.3267	0.398679	48615.4	121941	17862.4	16439.4	19214.3	110920	49062.1	78193.9	93527.5	128694	52215.4	122513	171448	163248
11.27_522.2840m/z	522.284	11.2698	neg	LysoPS(18:1(9Z)/0:0)	HMDB0240603	40829	LMGP03050001		9547099	89319-60-8	JZWNYZVVZXZRRH-YFKVPUFHSA-N	Lipids and lipid-like molecules	Glycerophospholipids	Glycerophosphoserines	***	70.4	96.7	M-H	C24H46NO9P	0.489833	2.69421	0.00802218	0.175772	-1.2754	0.413112	46622	112856	52152	69770.5	37425.5	42547.5	33246.5	44589.9	140629	164661	127111	134062	71364.9	39305.8
7.18_312.1577n	311.15	7.17835	neg	Propamidine	HMDB0256810	321777			64949		WTFXJFJYEJZMFO-UHFFFAOYSA-N	Benzenoids	Phenol ethers	Unclassified	*	38.5	0.728	M-H, M+FA-H	C17H20N4O2	-3.12308	2.65739	0.00776102	0.174305	10.1044	1100.87	64442.2	58.5377	67960.2	140375	10500.9	66996.9	17234.9	83585.5	42.9535	93.1211	29.4111	50.7938	134.947	4.23678e-05
0.79_271.1325n	310.096	0.794483	pos	(R)-N-(Quinuclidin-3-yl)furo(2,3-C)pyridine-5-carboxamide	HMDB0256381				16725588		IPKZCLGGYKRDES-UHFFFAOYSA-N	Organoheterocyclic compounds	Pyridines and derivatives	Pyridinecarboxylic acids and derivatives	*	36.9	0	M+H-H2O, M+K	C15H17N3O2	1.54384	2.64639	0.00225664	0.108799	0.443652	1.36004	219359	161288	238038	186370	244100	219356	208247	220041	146501	205279	123051	153008	162698	177191
3.68_298.0970m/z	298.097	3.68173	pos	5'-Methylthioadenosine	HMDB0001173	3425		C00170	439176	2457-80-9	WUUGFSXJNOTRMR-IOSLPCCCSA-N	Nucleosides, nucleotides, and analogues	5'-deoxyribonucleosides	5'-deoxy-5'-thionucleosides	***	76.9	96.6	M+H	C11H15N5O3S	0.596368	2.63333	0.0190319	0.22705	1.36737	2.58	111158	43084.4	212201	114321	108149	121378	49226.3	61671	25058.2	48384.6	56669.3	29045.1	35785.2	63564.1
11.54_386.2372m/z	386.237	11.5427	neg	N-linoleoyl taurine		75520	LMFA08020138		52922081		YIWODQVLEDDQSF-HZJYTTRNSA-N	Lipids and lipid-like molecules	Fatty Acyls	Fatty amides	*	39.4	4.55	M-H	C20H37NO4S	0.420357	2.58805	0.00986998	0.188475	-1.12188	0.459494	51347	111747	21605.9	59191.7	73410.5	25240.7	42083.8	86549.3	88134.5	53035.8	143792	108276	160022	117220
3.81_713.1706m/z	713.171	3.81285	neg	Okanin 4-methyl ether 4'-O-(2''-O-caffeoyl-6''-O-acetylglucoside)			LMPK12120179		15755770		CXLJITRXRSNEQL-LJGLFGHZSA-N	Lipids and lipid-like molecules	Polyketides	Flavonoids	*	40	11.5	M+FA-H	C33H32O15	-2.5649	2.58737	0.0089148	0.180485	-1.01098	0.496209	64768.3	130526	37735.1	52615.5	21621.8	66192.6	83849.8	126595	92480	178551	156556	132279	123980	99311.7
7.24_424.2175m/z	424.218	7.23663	pos	Amperozide	HMDB0248358	320939			73333		NNAIYOXJNVGUOM-UHFFFAOYSA-N	Benzenoids	Benzene and substituted derivatives	Diphenylmethanes	*	42.9	19.3	M+Na	C23H29F2N3O	1.07336	2.57629	0.0260969	0.256197	-1.51689	0.34944	33199	95006.4	45654.3	19823.7	38420.6	29015.4	30685.8	35594.2	81875.9	74290.8	67306.5	118426	197151	30988.7
0.70_130.0458n	148.08	0.699383	pos	2-Ethyldihydro-3(2H)-thiophenone	HMDB0040238	94769			530401	52662-38-1	KNYBAJCQHFBMOP-UHFFFAOYSA-N	Organoheterocyclic compounds	Thiolanes	Unclassified	*	38	3.41	M+H, M+NH4	C6H10OS	4.71834	2.50033	0.00130465	0.0903385	0.585469	1.50053	147572	98346.7	150049	160526	142250	155014	150214	127379	101145	71845.3	118830	80949	82081.2	135230
1.04_422.0876m/z	422.088	1.04432	neg	S-Pyruvylglutathione	HMDB0257426						PPLZFKVEEDKGDM-UHFFFAOYSA-N	Organic acids and derivatives	Carboxylic acids and derivatives	Amino acids, peptides, and analogues	***	56.6	50.9	M+FA-H	C13H19N3O8S	0.377365	2.48996	0.0136635	0.20373	1.01472	2.02051	119509	59148	155056	74180.1	179286	97952.1	85425.4	125154	7870.68	85309.3	53209.8	72532.4	71420.6	64545.1
11.69_402.2252n	425.214	11.6944	pos	5S-HETE di-endoperoxide		74966	LMFA03000011		52921873		DOXGUXRZAOCYPM-IPIAXWAYSA-N	Lipids and lipid-like molecules	Fatty Acyls	Eicosanoids	*	43.9	23.2	M+Na, M+K, M+H	C20H34O8	-0.500098	2.47704	0.0364814	0.287502	-0.299705	0.812419	312150	384224	307392	307240	290336	300113	393741	274079	391038	369498	500594	347996	336736	359480
11.66_410.2372m/z	410.237	11.6591	neg	N-arachidonoyl taurine		44906	LMFA08020075		42607331		YUNYSWCRLRYOPO-DOFZRALJSA-N	Lipids and lipid-like molecules	Fatty Acyls	Fatty amides	*	39.7	7.45	M-H	C22H37NO4S	0.39173	2.47109	0.0186656	0.224748	-1.6974	0.308342	26257.6	85157.6	6651.12	31895.7	37865.7	17751.2	21716.4	41665.6	55433.7	26435.7	159753	82478.1	127449	59395.5
0.76_338.0851n	337.078	0.757467	neg	(5R)-5-[(1S)-1,2-Dihydroxyethyl]-3-[(2R,3R,4S,5S,6R)-3,4,5-trihydroxy-6-(hydroxymethyl)oxan-2-yl]oxyoxolane-2,4-dione	HMDB0260164				74959682		LSMAUOJGZPNABT-UHFFFAOYSA-N	Lipids and lipid-like molecules	Fatty Acyls	Fatty acyl glycosides	**	38.5	4.89	M-H, M+FA-H	C12H18O11	0.575405	2.46911	0.00603142	0.15708	1.26293	2.39983	93035.5	38767.6	153470	101757	104078	67837	68143.5	62927.9	22435	22477	39294.2	42605.8	39039.2	66754.5
0.71_307.0436m/z	307.044	0.709183	neg	Mannitol 1-phosphate	HMDB0001530	3393		C00644	130418	15806-48-1	GACTWZZMVMUKNG-KVTDHHQDSA-N	Organic oxygen compounds	Organooxygen compounds	Carbohydrates and carbohydrate conjugates	*	42.3	14.2	M+FA-H	C6H15O9P	0.00620112	2.41231	0.00247052	0.111672	-0.94886	0.518042	53100.1	102502	35938.1	53138.2	58289	56688.9	53639.2	60907.3	116491	152452	90305.2	94983.9	92205.8	68571.8
10.90_548.2985m/z	548.298	10.8997	pos	1-(2-methoxy-6Z-heptadecenyl)-sn-glycero-3-phosphoserine			LMGP03060015		137323951		VRCJKDPTMPAFIX-PFIUAXAOSA-N	Lipids and lipid-like molecules	Glycerophospholipids	Glycerophosphoserines	*	52.4	69.8	M+Na	C24H48NO9P	4.95629	2.37244	0.00887824	0.180485	-1.21237	0.43156	40182	93108.8	48037.4	48657.8	34025.9	42611.6	28914.1	38845.1	111672	153605	95793.5	95102.8	60742.4	41737.2
0.67_265.1118m/z	265.112	0.6696	pos	3,4-dichloro-tridecanoic acid		96793	LMFA01090062		56935810		LVHXZABYFGYKLF-UHFFFAOYSA-N	Lipids and lipid-like molecules	Fatty Acyls	Fatty Acids and Conjugates	*	39.9	43.5	M+H-H2O	C13H24Cl2O2	-0.875878	2.34503	0.00183288	0.102177	0.697475	1.62166	121882	75158.5	160601	98495.1	103066	128181	117994	122954	71342.6	86793.6	84448.5	65976.5	92493.3	49896.6
11.39_807.0679m/z	807.068	11.3929	pos	Granatin A	HMDB0039271	93860			131752596	73683-70-2	BEAQEKRAXFQCBO-UHFFFAOYSA-N	Phenylpropanoids and polyketides	Tannins	Hydrolyzable tannins	*	36.7	0	M+Na	C34H24O22	3.55449	2.33715	0.01269	0.198858	1.42377	2.68286	87754.5	32709.3	94547.4	76072.8	154119	94667.7	40512.3	66608.3	17753.5	16926.9	59344.7	64266.8	14725.9	23238.1
0.79_468.1294m/z	468.129	0.794433	neg	Oxaprozin glucuronide	HMDB0255967						ZONKPOICDFFRNF-UHFFFAOYSA-N	Organic oxygen compounds	Organooxygen compounds	Carbohydrates and carbohydrate conjugates	*	43.1	27.9	M-H	C24H23NO9	-1.26892	2.3178	0.00343357	0.130685	1.46028	2.75161	74688.1	27143.4	81019.2	63580.7	91192.8	103071	64870.7	44394.2	884.487	13645	20453.3	25575.2	64311.4	37990.9
1.04_135.0312m/z	135.031	1.04432	neg	Hypoxanthine	HMDB0000157	83		C00262	790	68-94-0	FDGQSTZJBFJUBT-UHFFFAOYSA-N	Organoheterocyclic compounds	Imidazopyrimidines	Purines and purine derivatives	***	65.4	67.7	M-H	C5H4N4O	0.0426252	2.31379	0.0346451	0.282526	-0.620874	0.650277	105524	162275	97918.2	111339	96498.4	95008.8	108026	124351	239182	205245	184727	116869	129863	97763.3
0.79_250.0623n	233.059	0.794483	pos	gamma-Glutamylcysteine	HMDB0001049	5966		C00669	123938	636-58-8	RITKHVBHSGLULN-WHFBIAKZSA-N	Organic acids and derivatives	Carboxylic acids and derivatives	Amino acids, peptides, and analogues	***	63.2	41.7	M+H-H2O, M+H	C8H14N2O5S	-0.367199	2.27092	1.20913e-05	0.0165971	1.03045	2.04266	72336.2	35412.8	84429.2	64466.1	84884.2	64879.1	66471.3	68887.4	29854.9	39711.2	27961.6	36865.6	34454.9	43628.8
12.58_743.5611m/z	743.561	12.5801	pos	DG(22:3(10Z,13Z,16Z)/22:5(7Z,10Z,13Z,16Z,19Z)/0:0)[iso2]		4671	LMGL02010296		9543961		ADAYNMPDDSBBML-NVNFPEBVSA-N	Lipids and lipid-like molecules	Glycerolipids	Diradylglycerols	*	37.3	20.5	M+Na	C47H76O5	3.63051	2.26042	0.0362988	0.287004	-1.54552	0.342571	29741.9	86819.6	30963.3	59937.3	19894.8	18126	25404	24125.9	121517	160457	73299.4	116731	18787.1	30127
7.24_473.1644m/z	473.164	7.2435	neg	rosavin	HMDB0257308				53395247		RINHYCZCUGCZAJ-UHFFFAOYSA-N	Lipids and lipid-like molecules	Fatty Acyls	Fatty acyl glycosides	*	40	7.75	M+FA-H	C20H28O10	-4.71347	2.21824	0.0222878	0.242315	-1.88114	0.271468	16800.3	61886.7	28513.2	4908.48	24248.5	17956.2	9601.41	15573.9	48993.1	48901.6	44748.5	83490.4	130247	14939.6
12.25_395.2203m/z	395.22	12.2471	neg	1-pentadecanoyl-glycero-3-phosphate	HMDB0062324	82356	LMGP10050037		52929767		RZDCKQARKXMIQI-QGZVFWFLSA-N	Lipids and lipid-like molecules	Glycerophospholipids	Glycerophosphates	*	38.7	0.318	M-H	C18H37O7P	-0.293213	2.19069	0.0264731	0.256395	-0.875716	0.544983	59512.2	109200	65781.7	80461.1	65685.7	76311.8	34819.4	34013.7	116940	116959	155918	147862	60900.5	56621.6
10.20_658.3343m/z	658.334	10.1978	pos	OHHdiA-PE			LMGP20020043		134812373		HBDOLRKWTNOIOD-HPNFKZMPSA-N	Lipids and lipid-like molecules	Glycerophospholipids	Oxidized glycerophospholipids	*	48	52.8	M+Na	C30H54NO11P	2.51824	2.18017	0.0313666	0.272458	-1.80711	0.285762	22343.9	78190.7	20230.8	42615.5	10786.1	43728.7	6928.25	9774.33	5065.41	152257	92684.7	113000	57175.8	48962
13.95_212.9793m/z	212.979	13.9474	neg	Heptafluorobutyric acid	HMDB0253102	336951			9777		YPJUNDFVDDCYIH-UHFFFAOYSA-N	Organohalogen compounds	Alkyl halides	Alkyl fluorides	*	47.2	38.5	M-H	C4HF7O2	0.395911	2.13481	0.000880807	0.0775609	0.215252	1.16091	265745	228912	260526	247634	287416	255751	261424	281722	228373	219721	246611	216827	223386	238555
7.84_702.2523m/z	702.252	7.83813	neg	Tetrahydrofolyl-[Glu](n)	HMDB0006826	58561		C03541			RXWVHRYZTWZATH-UHFFFAOYSA-N	Organoheterocyclic compounds	Pteridines and derivatives	Pterins and derivatives	*	37.9	0	M-H	C29H37N9O12	4.8875	2.0852	0.0122341	0.196932	-1.33855	0.395417	27486.1	69511.8	9560.57	7482.56	9815.94	68702	28487.3	40868.5	53796.9	77004.2	35574.4	63695.3	101882	85117.9
11.71_824.5451m/z	824.545	11.7136	pos	PE(22:2(13Z,16Z)/5-iso PGF2VI)	HMDB0283966						DRRWVFSHTSWGQW-BCMUEGABSA-N	Unclassified	Unclassified	Unclassified	*	36.5	0	M+H-H2O	C45H80NO11P	1.72386	2.0828	0.00542056	0.151351	1.28388	2.43493	68019.8	27935	57454.3	44032	68992.2	58962.3	58770.3	119908	41783.8	31953.5	26810.4	25076.4	20558	21427.7
5.12_445.1682m/z	445.168	5.12225	pos	Verbasoside	HMDB0039233	93824			13889681	61548-34-3	DORPKYRPJIIARM-UHFFFAOYSA-N	Organic oxygen compounds	Organooxygen compounds	Carbohydrates and carbohydrate conjugates	*	38.8	4.92	M+H-H2O	C20H30O12	-4.93966	2.075	0.0232893	0.246189	-1.50534	0.352247	21879.8	62114.9	23699.6	11112.4	24372.9	26673.6	24389.5	21030.6	43688.7	32333.1	39708.6	110222	107539	39198.2
1.13_140.0682m/z	140.068	1.12627	pos	Norvaline	HMDB0013716	85259		C01799	439575	760-78-1	SNDPXSYFESPGGJ-SCSAIBSYSA-N	Organic acids and derivatives	Carboxylic acids and derivatives	Amino acids, peptides, and analogues	**	57.5	12.7	M+Na	C5H11NO2	0.418473	2.05725	0.0050403	0.147573	0.860494	1.81566	84924.4	46773.3	109640	109134	91962.1	48929.7	58609.4	91270.7	42889.7	41373.9	53369	53107.4	43513.7	46385.8
0.70_133.0375n	134.045	0.699383	pos	D-Aspartic acid	HMDB0006483	63097		C00402	83887	1783-96-6	CKLJMWTZIZZHCS-UWTATZPHSA-N	Organic acids and derivatives	Carboxylic acids and derivatives	Amino acids, peptides, and analogues	***	65.9	42.4	M+H-H2O, M+H	C4H7NO4	-0.361465	2.05316	0.00860747	0.179038	-0.700974	0.615157	60951.4	99082.7	64306	52740.5	53617.1	58046	48352.3	88646.5	137477	111702	105350	93318.6	71008.7	75640.5
0.68_331.0698m/z	331.07	0.681467	pos	(2S,4S)-Monatin	HMDB0041309	95722			9926066	146142-94-1	RMLYXMMBIZLGAQ-UHFFFAOYSA-N	Organic acids and derivatives	Carboxylic acids and derivatives	Amino acids, peptides, and analogues	*	37.2	0	M+K	C14H16N2O5	2.5343	2.04369	0.00703446	0.16627	-1.65731	0.317029	17407.2	54907.2	5319.17	12862.9	26697.6	13547.8	17668.9	28346.6	58581.7	31340.1	102132	35663.2	58240	43486.3
1.77_349.0945n	350.102	1.7713	pos	S-(Formylmethyl)glutathione	HMDB0060507	70375		C14871	11954074		VKLQBAQSSOPXGF-YUMQZZPRSA-N	Organic acids and derivatives	Carboxylic acids and derivatives	Amino acids, peptides, and analogues	***	59.1	72.2	M+H, M+Na	C12H19N3O7S	0.313446	2.02825	2.92497e-05	0.0206386	1.39519	2.63023	48441.5	18417.2	43246.1	42017.1	56117.5	50364.1	40769	58135.3	10760.9	21854.4	9205.81	23136.7	19425.1	26120.2
0.73_353.0896m/z	353.09	0.725633	neg	2-Ethoxy-6(5-tetrazolyl)xanthone	HMDB0247563				146000		MPTIYRLFOQQXKE-UHFFFAOYSA-N	Organoheterocyclic compounds	Benzopyrans	1-benzopyrans	*	37.6	0	M+FA-H	C16H12N4O3	1.4291	2.0267	0.00126845	0.0888864	-1.08248	0.472217	31034.2	65720.1	18964	18857.8	21463	31420.8	37744.4	57755.1	62551.9	66740.9	79227.1	75260.9	45546.7	64993.3
13.92_168.9894m/z	168.989	13.9206	neg	1,1,1,2,3,3,3-Heptafluoropropane	HMDB0244037				67940		YFMFNYKEUDLDTL-UHFFFAOYSA-N	Organohalogen compounds	Organofluorides	Unclassified	*	40.8	4.65	M-H	C3HF7	-0.0216234	2.02081	0.00084644	0.0759441	0.211631	1.158	243453	210236	237615	227288	264080	234884	239016	257835	212191	202573	225589	198737	206273	216055
5.68_784.2192m/z	784.219	5.68407	neg	Malvidin 3-p-coumarylrutinoside			LMPK12010385				FAUFNPIYYOOODX-NPQJFRCUSA-O	Lipids and lipid-like molecules	Polyketides	Flavonoids	*	37.6	3.18	M-H	C38H41O18+	-3.63755	2.00586	0.0034213	0.130496	1.4438	2.72037	55203.9	20292.8	45731.3	72944.3	42998.5	89930.8	47304.6	32314.1	19171.2	24213.4	11675.6	18699.5	29015.9	18981.4
10.04_538.3155m/z	538.316	10.0439	neg	LysoPC(16:1(9Z)/0:0)	HMDB0010383	40288	LMGP01050022	C04230	24779461	76790-27-7	LFUDDCMNKWEORN-ZXEGGCGDSA-N	Lipids and lipid-like molecules	Glycerophospholipids	Glycerophosphocholines	***	75.9	98.7	M+FA-H	C24H48NO7P	0.995018	1.99159	0.0146209	0.20829	0.596444	1.51199	104291	68976.4	104846	125126	72383.9	124223	125226	73941.2	57908.4	88975.8	78672.6	70098.8	47114.3	71088.5
12.55_455.1920m/z	455.192	12.5502	neg	Scorzoside	HMDB0040713				73816202		RCMFOCNCKTYXQN-UHFFFAOYSA-N	Lipids and lipid-like molecules	Prenol lipids	Terpene lactones	*	39.3	0.052	M+FA-H	C21H30O8	-0.743873	1.8995	0.0265288	0.256395	-1.77319	0.292561	15691.6	53635.3	19232.6	41112.2	4198.82	13829.1	8246.46	7530.4	91680.4	85519.9	57519.7	56887.5	12130.3	18073.9
0.75_472.1741n	473.181	0.746283	pos	Lupinisoflavone N		47791	LMPK12050284		14728999		VWJDUNSQXRTRSD-UHFFFAOYSA-N	Lipids and lipid-like molecules	Polyketides	Flavonoids	*	36.2	0	M+H, M+Na	C25H28O9	1.7216	1.88561	0.000486008	0.0619726	-0.590215	0.664244	56291.2	84744.8	53247.4	53513.8	63628.2	53891.8	68228.1	45238.1	84797.4	101007	68580.6	91500.9	79164.7	83418.5
12.03_354.2767n	355.284	12.0345	pos	Glyceryl monolinoleate	HMDB0242115	4252	LMGL01010006		5283469	26545-74-4	WECGLUPZRHILCT-HZJYTTRNSA-N	Lipids and lipid-like molecules	Fatty Acyls	Lineolic acids and derivatives	***	73.7	88.8	M+H-H2O, M+H	C21H38O4	-0.962399	1.86185	0.0411017	0.299557	-0.996758	0.501125	40563	80943.8	33958.9	66150.8	18270.4	33714.7	42407	48876.1	76655.8	135783	68246.2	119496	43502.6	41978.9
1.05_338.1018m/z	338.102	1.04575	pos	S-Hydroxymethylglutathione	HMDB0004662	7068		C14180	447123	32260-87-0	PIUSLWSYOYFRFR-BQBZGAKWSA-N	Organic acids and derivatives	Carboxylic acids and derivatives	Amino acids, peptides, and analogues	***	66.2	69.8	M+H	C11H19N3O7S	0.478416	1.84909	0.0439059	0.306163	1.6764	3.1963	53686.3	16796.4	63164.6	3691.54	12545.2	82628.4	74991.7	85096.3	4.23678e-05	10381.7	24549	1305.26	28795	35747.2
12.43_305.2473m/z	305.247	12.4301	pos	12R-hydroxy-5Z,8Z,12Z-eicosatrienoic acid	HMDB0062290	36270	LMFA03050012		5283149		RFAKHEWADWLSJX-ZIQRGBBDSA-N	Lipids and lipid-like molecules	Fatty Acyls	Eicosanoids	***	69.6	78	M+H-H2O	C20H34O3	-0.770203	1.84719	0.0338021	0.279914	-1.03616	0.487624	35569.1	72943.8	34208.2	65291.7	16009.4	36320.5	30253.1	31332	86712.4	85204.3	109960	93384.2	33386.2	29015.6
4.89_204.1055m/z	204.106	4.89427	pos	3-Cyclohexyl-1-propylsulfonic acid	HMDB0244400	342879			70815		PJWWRFATQTVXHA-UHFFFAOYSA-N	Organic nitrogen compounds	Organonitrogen compounds	Cyclohexylamines	*	39.9	4.02	M+H-H2O	C9H19NO3S	1.01961	1.82551	0.013292	0.201493	1.83957	3.57903	43654.2	12197.2	11120.2	69086.9	18336.9	38240.4	61304.2	63836.4	21488.2	18444.9	7807.78	7603.83	6482.79	11355.8
0.63_228.1475n	246.181	0.627433	pos	Pro-Ile	HMDB0304810						OCYROESYHWUPBP-CIUDSAMLSA-N	Organic acids and derivatives	Carboxylic acids and derivatives	Amino acids, peptides, and analogues	*	42	13.1	M+H, M+NH4	C11H20N2O3	0.404038	1.82119	0.0475985	0.314153	-0.263685	0.832958	193071	231790	150257	152848	176367	218347	216696	243911	250742	233431	212754	224991	218104	250717
11.42_572.2998m/z	572.3	11.4224	neg	PS(22:4(7Z,10Z,13Z,16Z)/0:0)		78841	LMGP03050014		52926282		JTHCCKGEGXLBGO-BIVCQWAISA-N	Lipids and lipid-like molecules	Glycerophospholipids	Glycerophosphoserines	**	51	0	M-H	C28H48NO9P	0.649854	1.81852	0.00846936	0.178763	-1.59873	0.330168	15334.8	46445.6	12906.8	29546.2	9486.36	21587.1	9641.96	8840.57	42345.6	76163.4	47129.5	65351.4	30344.4	17339.2
9.20_483.3020n	466.299	9.20378	pos	Lithocholyltaurine	HMDB0000722		LMST05040003	C02592	439763	516-90-5	QBYUNVOYXHFVKC-GBURMNQMSA-N	Lipids and lipid-like molecules	Steroids and steroid derivatives	Bile acids, alcohols and derivatives	***	65.2	75.1	M+H-H2O, M+NH4, M+Na, M+H	C26H45NO5S	0.275709	1.81764	0.0301891	0.268264	-0.892039	0.538852	40627.2	75395.8	49849.5	45374.8	34759.2	47856.2	20148.2	45775.1	99103.9	125669	62035.9	53290.1	72797.2	39479.2
5.69_477.2549n	478.262	5.68688	pos	Epothilone C	HMDB0251875	351564			53427299		BEFZAMRWPCMWFJ-UHFFFAOYSA-N	Phenylpropanoids and polyketides	Macrolides and analogues	Epothilones and analogues	*	38.2	1.24	M+H-H2O, M+H	C26H39NO5S	0.0811289	1.80899	0.0300034	0.267638	1.42859	2.69184	55640	20669.9	33494.2	70316.9	24609.4	115177	51942	38301	18000.4	12545.3	15735.9	28301.5	28400.9	21035.4
12.42_371.2203m/z	371.22	12.4241	neg	Anordiol	HMDB0248450				21953304		HUUUMTTWAPMBMU-UHFFFAOYSA-N	Lipids and lipid-like molecules	Steroids and steroid derivatives	Androstane steroids	*	37.5	0	M+FA-H	C22H30O2	-7.4648	1.80759	0.0300811	0.267887	-0.715731	0.608897	54249.6	89095	46742.2	80552.4	29771.1	64686.8	61050.4	42694.9	115933	100166	109953	102451	55868.7	50199.3
0.86_156.0421m/z	156.042	0.85875	pos	N,N-dimethyl-beta-alanine	HMDB0304421						KAUSGXYXRRGGFJ-UHFFFAOYSA-M	Organic acids and derivatives	Carboxylic acids and derivatives	Carboxylic acid derivatives	**	58.6	3.73	M+K	C5H11NO2	0.000173063	1.80124	0.00140263	0.0919395	0.761583	1.69535	64564.6	38083.4	68951.6	79573.4	62003.1	43132.6	54783.1	78944	31986.7	35638.3	37720.5	39776.7	38735.3	44642.7
10.34_1111.5983m/z	1111.6	10.3358	neg	(-)-Euphomine		53679	LMPR0104300003		42608243		KJAZUSMSKFLAQW-LMRGBCEQSA-N	Lipids and lipid-like molecules	Prenol lipids	Isoprenoids	*	36.9	0	2M-H	C32H44O8	-1.50377	1.7937	0.00915813	0.182164	-1.42426	0.372611	17222.7	46221.7	25087.1	24078.1	15020.9	23837.3	6826.63	8486.18	69433.8	60396.7	55786.5	46436.6	31183.6	14092.8
1.06_576.1717m/z	576.172	1.061	pos	Piceatannol 4'-galloylglucoside	HMDB0040862	95318			131752958	116107-19-8	WBKDRBRGYHZWCT-UPHRSURJSA-N	Phenylpropanoids and polyketides	Stilbenes	Stilbene glycosides	*	36.4	0	M+NH4	C27H26O13	0.866694	1.76739	0.0209622	0.235978	0.88748	1.84994	68177.8	36854	86575.7	55882.7	75057.1	56495.4	59817.5	75238	24061.2	18507.4	11411.7	53455.5	35449	78239.3
6.65_228.1360n	251.125	6.65185	pos	(-)-12-hydroxy-9,10-dihydrojasmonic acid		45945	LMFA02020015		10082491		SXFKEAKOXUOQGN-NXEZZACHSA-N	Lipids and lipid-like molecules	Fatty Acyls	Octadecanoids	*	48.5	45.8	M+H, M+Na, M+NH4, M+H-H2O	C12H20O4	-0.623854	1.76112	0.00529622	0.151058	-0.702128	0.614665	44109.7	71762.1	58426.2	45225.6	39181.2	43914.5	38239	39671.4	90516.6	63923.7	96743.1	64380.3	53001.7	62007.3
10.42_668.1944m/z	668.194	10.4182	neg	Hirsutin			LMPK12010418		102273905		TVLYGBFZDPPZFR-PWZIMACXSA-O	Lipids and lipid-like molecules	Polyketides	Flavonoids	*	41	17.9	M-H	C30H37O17+	-2.0345	1.74761	0.00502376	0.147458	-1.59404	0.331243	13639.6	41177.1	20809.1	21987.8	15985.4	12413.8	4986.74	5654.95	46473.9	63177.3	56576	34894.4	28360.7	17580.4
0.84_175.0017m/z	175.002	0.84175	pos	Allopurinol	HMDB0014581	865		C06816	2094	315-30-0	OFCNXPDARWKPPY-UHFFFAOYSA-N	Organoheterocyclic compounds	Pyrazolopyrimidines	Pyrazolo[3,4-d]pyrimidines	*	39.1	2.73	M+K	C5H4N4O	0.429095	1.74635	0.00908826	0.181787	-0.677838	0.625101	46847.6	74943.9	40684	47649.9	39369.5	47468.6	49602.1	56311.3	93661.4	98137	82890.3	66083.3	64784.5	44107.1
11.38_531.2732m/z	531.273	11.3798	neg	PG(20:4(5Z,8Z,11Z,14Z)/0:0)		46735	LMGP04050010		42607485		GXPOZJZFGYCEMT-VEKMRQFKSA-N	Lipids and lipid-like molecules	Glycerophospholipids	Glycerophosphoglycerols	*	49.1	50.4	M-H	C26H45O9P	0.601096	1.73878	0.0340937	0.280924	-0.823343	0.565131	41380.6	73223.1	43638.9	51633.7	26925.3	65545.4	33709.3	26831	100138	104619	75078.6	55113.6	74062.9	30326.3
1.05_286.0968m/z	286.097	1.04575	pos	Flumazenil	HMDB0015336	2724		C07825	3373	78755-81-4	OFBIFZUFASYYRE-UHFFFAOYSA-N	Organoheterocyclic compounds	Benzodiazepines	1,4-benzodiazepines	*	36.8	0	M+H-H2O	C15H14FN3O3	-6.05163	1.73389	0.0473319	0.31338	-0.421603	0.746595	94514.1	126594	75615.2	96311	81515.7	87002	100720	125920	161290	149862	115594	138837	115185	78791.7
12.26_373.2111m/z	373.211	12.2604	pos	2-((5-(Diethylamino)-[1,2,4]triazolo[1,5-a]pyrimidin-7-yl)(hexyl)amino)ethanol	HMDB0244283				127644		NWCVGIMEZSWINX-UHFFFAOYSA-N	Organoheterocyclic compounds	Triazolopyrimidines	Unclassified	*	39	0	M+K	C17H30N6O	-0.600241	1.72674	0.00245814	0.111672	-1.07989	0.473063	22833.5	48267.3	23306.5	35439.8	23210	29068.2	11878.1	14098.5	55370.4	53542.9	60440.5	55608.5	29125.1	35516.4
0.74_304.1151m/z	304.115	0.741033	neg	Hydroxyprolyl-Glutamine	HMDB0028861	85769			61157217		BCLVLAZXTOULCD-UHFFFAOYSA-N	Organic acids and derivatives	Carboxylic acids and derivatives	Amino acids, peptides, and analogues	**	58.2	0	M+FA-H	C10H17N3O5	0.450867	1.71815	0.00312789	0.124219	0.885389	1.84726	52082.9	28194.6	37601.3	61496.7	40004.3	49411.6	56943.4	67040.1	23023.7	32026.9	42664.8	19774.9	18297.9	33379.7
7.01_462.2847m/z	462.285	7.0141	pos	Bufotalin		71435	LMST01130023	C16923	12302120	471-95-4	VOZHMAYHYHEWBW-NVOOAVKYSA-N	Lipids and lipid-like molecules	Steroids and steroid derivatives	Sterols	*	46.8	36.1	M+NH4	C26H36O6	-0.627207	1.71029	0.031474	0.272859	1.66082	3.16195	44796	14167.2	31894.5	59655.4	3794.7	42750.5	91020.1	39660.9	24838.6	15476.3	4637.79	12114.8	19378.4	8557.44
1.05_158.1176m/z	158.118	1.04575	pos	N-(3-Hydroxypropyl)valine	HMDB0255001				43468391		LPXDRBWCBNPDTJ-UHFFFAOYSA-N	Organic acids and derivatives	Carboxylic acids and derivatives	Amino acids, peptides, and analogues	**	49.7	0	M+H-H2O	C8H17NO3	0.401265	1.70837	0.000540718	0.0634053	1.26426	2.40204	38586.4	16064	29821.1	45031.4	31648	54758.7	34849.2	35410	16508.2	19228.1	24749.6	13652	8178.14	14068.1
1.23_408.1490m/z	408.149	1.23068	pos	Minoxidil Glucuronide	HMDB0254740				74765399		WJHSTCUDHNONOO-UHFFFAOYSA-N	Organic oxygen compounds	Organooxygen compounds	Carbohydrates and carbohydrate conjugates	*	40	8.55	M+Na	C15H23N5O7	-0.00717552	1.69878	0.00728039	0.169258	0.911342	1.88079	57550.2	30598.9	80993.8	70390.5	63106.6	32812.3	38412.8	59585.1	24482.6	23174.2	28356.6	39791.7	32820.7	34967.5
6.60_598.2617m/z	598.262	6.59568	neg	Rotigaptide	HMDB0257314				85052343		GFJRASPBQLDRRY-UHFFFAOYSA-N	Organic acids and derivatives	Carboxylic acids and derivatives	Amino acids, peptides, and analogues	*	38.5	0	M-H2O-H	C28H39N7O9	-2.26217	1.67949	0.0228549	0.24453	2.28956	4.88906	35918.8	7346.78	23443.1	37127.3	579.45	70854.5	59141.9	24366.6	12370.7	6128.36	2265.52	6214.63	12942.6	4158.88
7.16_392.2045n	415.194	7.16268	pos	Glycylphenylalanylleucylglycine	HMDB0252827				21873138		WEZDRVHTDXTVLT-UHFFFAOYSA-N	Organic acids and derivatives	Carboxylic acids and derivatives	Amino acids, peptides, and analogues	*	38.3	0	M+NH4, M+Na	C19H28N4O5	-3.83376	1.67618	0.0169724	0.217969	1.96486	3.90374	38673.2	9906.7	59256.9	51113.8	68117.2	29501.9	14866.3	9182.82	10986.3	8056.8	4036.35	11342.9	9722.89	15295
12.24_328.2400n	329.247	12.2418	pos	Docosahexaenoic acid	HMDB0002183	3457	LMFA01030185	C06429	445580	6217-54-5	MBMBGCFOFBJSGT-KUBAVDMBSA-N	Lipids and lipid-like molecules	Fatty Acyls	Fatty acids and conjugates	*	58.8	98.5	M+H-H2O, M+H	C22H32O2	-0.731123	1.67329	0.0281291	0.260164	-0.936111	0.52264	33970.3	64997.6	31473.3	50323.5	32455.5	39231.8	25987.2	24350.7	61136.4	73859.3	110146	72746.6	30493	41604.4
12.56_717.5452m/z	717.545	12.5612	pos	PA(15:0/22:1(13Z))	HMDB0114825				131821879		ALWGEKGYDBQVFJ-DYFSFZQGSA-N	Lipids and lipid-like molecules	Glycerophospholipids	Glycerophosphates	*	38.5	0	M+H	C40H77O8P	3.26322	1.66817	0.0341236	0.280972	-1.80564	0.286055	12157.7	42501.3	12537.2	23087.6	5668.44	8048.23	10051.5	13553.2	68486.3	77972.9	37017.9	54314.7	6666.11	10549.6
10.43_1067.5585m/z	1067.56	10.431	pos	PGP(i-24:0/TXB2)	HMDB0275964						ITTWYJYGJKOPNS-AWKFALABSA-N	Unclassified	Unclassified	Unclassified	*	37.9	0	M+K	C50H94O17P2	-1.25669	1.66318	0.0134101	0.202112	-4.01605	0.0618086	1777.38	28756.1	4003.43	4449.09	547.712	733.357	4.39419	926.278	42219.2	65779	20388.9	23302.9	17073.9	3772.98
4.09_233.1266n	256.116	4.09482	pos	4-[(2,4-Dihydroxy-3,3-dimethylbutanoyl)amino]butanoic acid	HMDB0246316				2527		SBBDHANTMHIRGW-UHFFFAOYSA-N	Organic acids and derivatives	Carboxylic acids and derivatives	Amino acids, peptides, and analogues	***	59.6	51.5	M+Na, M+K, M+H	C10H19NO5	1.35107	1.64971	0.000304798	0.0511408	0.687957	1.611	53130.8	32980	56228.3	54277	41994.3	49040.4	66435.9	50808.7	34730.4	32447.3	32596.8	30488.1	27733.5	39883.8
10.45_602.2021m/z	602.202	10.4494	pos	Dapagliflozin 3-o-glucuronide	HMDB0259686				139600775		ZYZULHSUKTZGTR-UHFFFAOYSA-N	Organic oxygen compounds	Organooxygen compounds	Carbohydrates and carbohydrate conjugates	*	37.5	0	M+NH4	C27H33ClO12	3.87351	1.62669	0.000905603	0.0785586	-0.88524	0.541397	24874	45944.1	26764.7	35304.9	22245.6	30688.2	12794	21446.7	48725	54279.9	43062.9	54238.5	40304.2	35054
4.61_283.0825m/z	283.083	4.60645	neg	(S)-(+)-1-(p-Hydroxy-trans-cinnamoyl)-glycerol	HMDB0303070				5319874		YUQSZTOOHLGKGG-ZZXKWVIFSA-N	Phenylpropanoids and polyketides	Cinnamic acids and derivatives	Hydroxycinnamic acids and derivatives	***	58.4	35.2	M+FA-H	C12H14O5	0.807322	1.62639	0.0129871	0.200719	-1.71022	0.305614	11401.5	37307	5256.46	4643.56	1325.18	38028.1	9240.54	9915.3	46711.9	64706.5	33450.8	24326.5	34060.6	20585.4
4.60_328.2123m/z	328.212	4.59843	pos	3-Methylnonanedioylcarnitine	HMDB0240795						FIIIQFKVGGXMNO-UHFFFAOYSA-N	Lipids and lipid-like molecules	Fatty Acyls	Fatty acid esters	*	51.8	64.7	M+H-H2O	C17H31NO6	1.20954	1.62107	0.00354334	0.132089	3.29703	9.82888	25924.2	2637.56	48537	6887.28	34515.8	29721.2	22487	13397.1	3088.02	2652.06	2879.08	2861.16	2908.06	1436.96
7.00_460.2710m/z	460.271	6.99937	neg	Salmeterol	HMDB0015073	2387		C07241	5152	89365-50-4	GIIZNNXWQWCKIB-UHFFFAOYSA-N	Benzenoids	Benzene and substituted derivatives	Benzyl alcohols	***	54.9	50	M+FA-H	C25H37NO4	1.30781	1.6192	0.0214437	0.238414	1.67654	3.19659	38296.1	11980.3	30174.4	58667.9	2744.69	42692.7	65422.9	30074.3	20261	12713.5	3089.03	9975.09	19246.3	6596.91
0.83_350.1094m/z	350.109	0.827467	neg	N-Acetyl-7-O-acetylneuraminic acid	HMDB0000785			C04016	12315523	18529-63-0	DUOKWMWKFGDUDQ-GRRZBWEESA-N	Organic oxygen compounds	Organooxygen compounds	Carbohydrates and carbohydrate conjugates	***	51.5	35.2	M-H	C13H21NO10	0.392718	1.61886	0.0404843	0.29839	0.182222	1.13463	262401	231266	266595	270737	298765	226660	251176	260475	234362	201495	210571	232701	248836	259631
0.72_305.1454m/z	305.145	0.715617	pos	N-Ribosylhistidine	HMDB0002089	6481			126923	98379-91-0	TTYCFBAOLXCFAB-VAPHQMJDSA-N	Organic acids and derivatives	Carboxylic acids and derivatives	Amino acids, peptides, and analogues	**	54.7	0	M+NH4	C11H17N3O6	-0.616137	1.60931	0.000747651	0.0720928	-1.92985	0.262457	7536.73	28716.1	7102.2	9237.38	4.23678e-05	7265.7	12205.9	9409.16	25394.6	40261.4	38803.4	30217.9	24264.6	13354.7
5.11_489.1595m/z	489.159	5.10693	neg	3-Aminobenzanthrone	HMDB0245815				13143216		ZXPXRBDYCANCCU-UHFFFAOYSA-N	Benzenoids	Phenanthrenes and derivatives	Unclassified	*	39.2	0	2M-H	C17H11NO	-2.8448	1.57435	0.0200713	0.231652	-1.67894	0.312312	10308.8	33008.1	12449.5	5356.99	12033.8	12742.1	10355.9	8914.65	24176.6	15953.8	20601.7	58013	59022.9	20280.4
0.79_959.2281n	940.21	0.794433	neg	3-oxo-6Z,9Z-dodecatrienoyl-CoA			LMFA07050464				DFTQFOYBHUUHMQ-GEKZHSOESA-N	Lipids and lipid-like molecules	Fatty Acyls	Fatty esters	*	38.2	0	M-H2O-H, M-H	C33H52N7O18P3S	-2.24629	1.53095	0.0278057	0.258971	0.188455	1.13954	218040	191340	198529	228525	217811	204318	231963	227097	230566	191611	190747	188986	178819	167313
0.76_155.0099m/z	155.01	0.757467	neg	Orotic acid	HMDB0000226	318		C00295	967	65-86-1	PXQPEWDEAKTCGB-UHFFFAOYSA-N	Organoheterocyclic compounds	Diazines	Pyrimidines and pyrimidine derivatives	***	72.6	89.8	M-H	C5H4N2O4	0.33668	1.51243	0.0278116	0.258971	-1.80364	0.28645	8665.27	30250.5	3638.12	3185.3	2950.8	4249.79	9189.14	28778.4	28918.5	9257.14	23366.9	50449.1	52960.3	16551.2
9.78_467.3012n	468.309	9.77907	pos	PC(0:0/14:0)		40339	LMGP01050073		24779490		IGZPHNNYPPAPLA-OAQYLSRUSA-N	Lipids and lipid-like molecules	Glycerophospholipids	Glycerophosphocholines	***	68.2	72.9	M+H, M+Na	C22H46NO7P	0.0788429	1.50435	0.0390218	0.294668	0.541791	1.45578	72617.2	49882	62285.7	82551.2	52321.4	67827.7	107960	62757	38991	58689	54878.3	64184.4	31494.1	51055.5
13.20_383.3397n	406.329	13.1976	pos	N-Stearoyl Valine	HMDB0241952				14809077		SIPMISGYHBUSIB-UHFFFAOYSA-N	Organic acids and derivatives	Carboxylic acids and derivatives	Amino acids, peptides, and analogues	*	55.7	82.3	M+H, M+Na	C23H45NO3	-0.593864	1.48928	0.0012974	0.0903385	-0.491174	0.711446	42881.1	60273.2	52454.9	37826.4	46208.3	40576.6	42430	37790.7	66804.9	54913.3	65320	69296.1	54965.9	50339
4.71_389.1185m/z	389.118	4.71275	pos	Salicyluric beta-D-glucuronide	HMDB0240252				121596205		OEPADIDIUZTYOX-QKZHPOIUSA-N	Organic oxygen compounds	Organooxygen compounds	Carbohydrates and carbohydrate conjugates	*	41.5	12.3	M+NH4	C15H17NO10	-1.65862	1.4874	0.0468904	0.313162	9.31596	637.358	25250	39.6166	9328.46	9726.69	8413.24	79102.9	25607.7	19320.8	26.3784	4.23678e-05	4.23678e-05	143.507	4.23678e-05	67.8138
0.75_275.1712m/z	275.171	0.746283	pos	Glutaminyllysine	HMDB0028802				71363012	45234-03-5	CLSDNFWKGFJIBZ-YUMQZZPRSA-N	Organic acids and derivatives	Carboxylic acids and derivatives	Amino acids, peptides, and analogues	**	50.5	0	M+H	C11H22N4O4	-0.674497	1.48027	5.29795e-06	0.0154535	2.493	5.62946	18525.1	3290.74	21655.7	20065.8	20846.3	17710.7	18864.1	12007.7	1645.11	7627.89	3841.62	943.996	1775.1	3910.72
1.41_456.2077m/z	456.208	1.4054	pos	Turofexorate isopropyl	HMDB0247151				10026128		INASOKQDNHHMRE-UHFFFAOYSA-N	Organoheterocyclic compounds	Indoles and derivatives	Indoles	*	36.3	0	M+NH4	C25H24F2N2O3	-3.71077	1.47329	0.0208347	0.235464	3.01746	8.09743	24654.2	3044.69	39165.2	49900.4	30828.5	8014.13	19067.2	949.484	4.23678e-05	130.226	565.299	2916.79	2360.2	12295.6
10.40_324.2302n	347.219	10.3954	pos	TOFA		34518			115175	54857-86-2	CZRCFAOMWRAFIC-UHFFFAOYSA-N	Unclassified	Unclassified	Unclassified	*	38.7	0	M+H, M+Na, M+H-H2O	C19H32O4	0.555865	1.46479	0.000929131	0.078841	1.60992	3.05234	25628.2	8396.23	23177.6	30450.8	23660.1	13305.8	39747.4	23427.2	7462.8	7843.58	9880.08	11455.3	8878.38	4857.27
1.05_172.0969m/z	172.097	1.04575	pos	3-hydroxyhexanoylglycine	HMDB0094720				131802903		AYNJYFWPCLXDNL-UHFFFAOYSA-N	Organic acids and derivatives	Carboxylic acids and derivatives	Amino acids, peptides, and analogues	*	38.5	0	M+H-H2O	C8H15NO4	0.661044	1.43467	0.0188441	0.225544	-2.4234	0.186416	4992.2	26779.8	3645.82	2519.6	2446.72	4404.25	6367.63	10569.2	23718.2	47787.6	51926.2	17910.2	13088.8	6248.09
0.79_145.0496m/z	145.05	0.794483	pos	D-1-Deoxy-erythro-hexo-2,3-diulose	HMDB0029934	86599			131750927		DTUGXZBPWDHASD-UHFFFAOYSA-N	Organic oxygen compounds	Organooxygen compounds	Carbohydrates and carbohydrate conjugates	**	58.4	10.2	M+H-H2O	C6H10O5	0.202981	1.42928	0.00346256	0.130954	0.202314	1.15054	138823	120659	137606	128156	156094	135410	136513	139159	120965	110065	120292	118775	121508	132348
4.85_479.1151m/z	479.115	4.8452	neg	Verproside	HMDB0259794				495172		DBUOUVZMYWYRRI-UHFFFAOYSA-N	Organic oxygen compounds	Organooxygen compounds	Carbohydrates and carbohydrate conjugates	**	40.2	0	M-H2O-H	C22H26O13	-8.76319	1.42339	0.0253454	0.252966	28.8901	4.97477e+08	21077	4.23678e-05	11091.7	10729.8	9219.02	60382.4	20291.5	14747.7	4.23678e-05	4.23678e-05	4.23678e-05	4.23678e-05	4.23678e-05	4.23678e-05
0.79_522.0877m/z	522.088	0.794433	neg	ARN-509	HMDB0248608				24872560		HJBWBFZLDZWPHF-UHFFFAOYSA-N	Organoheterocyclic compounds	Azolidines	Imidazolidines	*	36.3	0	M+FA-H	C21H15F4N5O2S	2.55896	1.40185	0.000795649	0.0735417	-1.23209	0.425699	11275.8	26487.6	8927.26	12857.1	8215.58	17740.1	4383.01	15531.6	38123	22687.7	27006	26176.6	21455.5	23477
12.25_463.2080m/z	463.208	12.2471	neg	Acetamide, 2-(4-(2-((2-hydroxy-3-phenoxypropyl)amino)ethoxy)phenoxy)-N-(2-methoxyethyl)-, (S)-	HMDB0259996				4573889		RVMBDLSFFNKKLG-UHFFFAOYSA-N	Benzenoids	Phenol ethers	Unclassified	*	39.4	0.00696	M+FA-H	C22H30N2O6	-1.36463	1.40037	0.0127074	0.198878	-0.767158	0.587574	25968.3	44195.8	31046.6	34899.2	28909.5	30565.8	16251	14137.7	50265.3	43830.9	53857.2	57263.9	32386.5	27571.2
0.60_226.9662m/z	226.966	0.596967	neg	5-Sulfo-1,3-benzenedicarboxylic acid	HMDB0032822	88744			80714	22326-31-4	CARJPEPCULYFFP-UHFFFAOYSA-N	Benzenoids	Benzene and substituted derivatives	Benzenesulfonic acids and derivatives	*	37.8	0	M-H2O-H	C8H6O7S	2.34615	1.39607	0.0434554	0.305911	0.560904	1.47519	68387.8	46358.6	74271	69650.2	95786.5	58035	60899.5	51684.9	29930.3	28022.2	40475.6	49524.5	56603.7	73595.1
1.51_322.1070m/z	322.107	1.51497	pos	2-Amino-5-((1-((carboxymethyl)amino)-3-(methylthio)-1-oxopropan-2-yl)amino)-5-oxopentanoic acid	HMDB0244993						QTQDDTSVRVWHMO-UHFFFAOYSA-N	Organic acids and derivatives	Carboxylic acids and derivatives	Amino acids, peptides, and analogues	***	56.1	47.8	M+H	C11H19N3O6S	0.772043	1.38827	0.017432	0.218814	1.63619	3.10844	29031	9339.4	39465.7	22628.9	48737.1	41137.3	13728.1	8489.01	6427.14	8500.72	4471.09	7471.15	12843.8	16322.5
0.79_172.0968m/z	172.097	0.794483	pos	Castanospermine	HMDB0249700				2592		JDVVGAQPNNXQDW-UHFFFAOYSA-N	Organoheterocyclic compounds	Indolizidines	Unclassified	*	45.9	36.6	M+H-H2O	C8H15NO4	0.0624199	1.38638	0.0265791	0.256395	-2.34096	0.197378	5347.19	27091.1	2938.27	3876.22	2592.67	5845.97	5830.78	10999.3	21042.1	59410.3	44413.8	16856.1	12756.9	8067.11
5.68_597.2469m/z	597.247	5.68407	neg	Niraxostat	HMDB0255624	450986			449035		AETHRPHBGJAIBT-UHFFFAOYSA-N	Organoheterocyclic compounds	Azoles	Pyrazoles	*	39.5	4.58	2M-H	C16H17N3O3	0.26887	1.37426	0.00467837	0.142702	1.54787	2.92386	25241.4	8632.91	19352.8	31697.2	18021.2	43761.1	23772.4	14843.9	7512.73	9890.56	3663.85	7619.74	12900.1	10210.5
7.16_437.2032m/z	437.203	7.15522	neg	glas#1			LMFA13040106		86289812		MVQVASRYTUDSCI-POLQEPQQSA-N	Lipids and lipid-like molecules	Fatty Acyls	Fatty acyl glycosides	*	43.7	22.1	M-H	C19H34O11	0.925883	1.3569	0.0261471	0.256254	2.07037	4.19993	26118.1	6218.69	44111	32757.8	47900.8	21253.1	6473.77	4212.06	6262.98	6163.29	3534.21	7245.15	5371.95	8734.59
10.19_636.2540m/z	636.254	10.1924	neg	Mycobactins	HMDB0254968				3083702		HQYXQBFMMYIDEA-UHFFFAOYSA-N	Organic acids and derivatives	Peptidomimetics	Depsipeptides	*	44.1	27.4	M+FA-H	C27H37N5O10	3.00937	1.34926	0.01844	0.223881	-0.30257	0.810807	76831.6	94759.5	87819.8	76272.6	91917.6	79654.2	69643.8	55681.6	92409.2	80024.7	105794	96216.4	95118	98994.2
0.73_143.0582n	144.066	0.731017	pos	6-Oxopiperidine-2-carboxylic acid	HMDB0061705				3014237		FZXCPFJMYOQZCA-UHFFFAOYSA-N	Organic acids and derivatives	Carboxylic acids and derivatives	Amino acids, peptides, and analogues	*	44.6	24.8	M+H, M+NH4, M+H-H2O	C6H9NO3	0.020387	1.3433	0.0149871	0.209437	0.306045	1.23631	97350.4	78742.5	113896	99009.7	108578	85248.4	92012.3	85358.2	73654	63934.7	79326.4	78751.2	93644.2	83144.4
11.88_302.2245n	303.232	11.8835	pos	8,13-Abietadien-18-oic acid	HMDB0038172		LMPR0104050012	C12077	16040		MLBYBBUZURKHAW-UHFFFAOYSA-N	Lipids and lipid-like molecules	Prenol lipids	Diterpenoids	***	66.4	35.9	M+H-H2O, M+H	C20H30O2	-0.395904	1.32254	0.0175713	0.219172	-1.19337	0.43728	14858.2	33978.6	17632.8	17896.3	4881.8	21431.5	15376.4	11930.2	23493.2	33360.6	61265	37003.4	15902.9	32846.4
1.04_272.0888m/z	272.089	1.04432	neg	Cytosine deoxyribonucleoside	HMDB0250725				637		CKTSBUTUHBMZGZ-UHFFFAOYSA-N	Nucleosides, nucleotides, and analogues	Pyrimidine nucleosides	Pyrimidine 2'-deoxyribonucleosides	***	59.4	50.2	M+FA-H	C9H13N3O4	0.124838	1.31915	0.00116575	0.0847439	0.655703	1.57538	38731.1	24585.2	47933.8	38956.4	43512.4	38068.6	34653.9	29261.7	28882.2	29027.2	20558.2	20885.9	21323	26834.9
5.05_229.1435m/z	229.144	5.04862	pos	Butanedioic acid, octenyl-	HMDB0249455				120057		GUOCOOQWZHQBJI-UHFFFAOYSA-N	Lipids and lipid-like molecules	Fatty Acyls	Fatty acid esters	*	51.6	60.6	M+H	C12H20O4	0.29658	1.31672	0.0260232	0.256116	-1.17818	0.441909	13065.4	29565.9	13701.3	10052.2	14867.4	14667.4	14255.3	10848.9	21287.7	15999.1	20157.4	51494.4	46710.5	21746.3
12.36_362.2372m/z	362.237	12.3559	neg	N-Palmitoyltaurine	HMDB0240594	44910	LMFA08020080		14504290	83982-06-3	LPDJCYFKKSLKRO-UHFFFAOYSA-N	Lipids and lipid-like molecules	Fatty Acyls	Fatty amides	*	39.6	9.51	M-H	C18H37NO4S	0.362807	1.31047	0.0461755	0.311418	-1.13571	0.455112	15914	34967.3	4380.92	12683.7	25760.1	5885.4	15776.1	30998.1	23172.9	10975.2	62429.8	35947.2	43047.8	34231
7.18_379.1378m/z	379.138	7.17835	neg	4-(4-Methylpiperazin-1-yl)-7-(trifluoromethyl)pyrrolo[1,2-a]quinoxaline	HMDB0249864						LXFHSCDLMBZYKY-UHFFFAOYSA-N	Organoheterocyclic compounds	Diazanaphthalenes	Benzodiazines	*	48.5	50.3	M+FA-H	C17H17F3N4	-2.81181	1.30439	0.00947706	0.184443	28.4715	3.72199e+08	15769.3	4.23678e-05	16158.2	35363.8	2092.84	16743	4081.63	20176.1	4.23678e-05	4.23678e-05	4.23678e-05	4.23678e-05	4.23678e-05	4.23678e-05
0.70_291.1185m/z	291.119	0.699383	pos	(2,5-Dioxopyrrolidin-1-yl) 5-(2-hydroxyethoxy)-4-oxopentanoate	HMDB0242493				127583		OVPTZXRXNNJKSJ-UHFFFAOYSA-N	Organic acids and derivatives	Keto acids and derivatives	Gamma-keto acids and derivatives	*	39.3	0	M+NH4	C11H15NO7	-0.57961	1.29653	0.0186318	0.224748	0.799512	1.74051	38565.3	22157.5	48067.4	39391.8	37772	49060.5	34726.6	22373.7	12581.5	11944.3	21323.6	17921.1	31112	38062.3
1.11_588.2037m/z	588.204	1.1094	pos	855527-92-3 (R-Isomer)	HMDB0260361				10167713		XMRGQUDUVGRCBS-UHFFFAOYSA-N	Benzenoids	Benzene and substituted derivatives	Trifluoromethylbenzenes	*	36.4	0	M+H-H2O	C32H27F4N5O3	3.19915	1.29334	0.0485209	0.31671	1.66817	3.17812	27482.5	8647.4	50450.3	52198.7	26092.8	18468.9	10773.5	6910.7	5878.61	5581.5	2891.02	13734.6	5233.54	18565.1
3.81_445.1394m/z	445.139	3.80808	pos	Euchrenone a2		52794	LMPK12140310		14134103		HLKHOVQEAJNZDM-UHFFFAOYSA-N	Lipids and lipid-like molecules	Polyketides	Flavonoids	*	38	4.51	M+K	C25H26O5	-4.35435	1.27369	0.00355513	0.132128	0.634406	1.5523	38214.3	24617.9	34538.2	40444.3	27624.8	32411.8	48618	45648.3	21097.3	27943.7	26134.2	20633.6	28550.5	23347.9
1.05_233.1132m/z	233.113	1.04575	pos	Valylaspartic acid	HMDB0029123	23822			7009608	20556-16-5	OBTCMSPFOITUIJ-FSPLSTOPSA-N	Organic acids and derivatives	Carboxylic acids and derivatives	Amino acids, peptides, and analogues	**	57.5	0	M+H	C9H16N2O5	-0.0258733	1.25742	0.018715	0.224965	0.669585	1.59062	40833	25671.2	27975.2	33422.5	31259	60579.2	43630.1	48132	20013	26676.1	25418.6	21890.3	26137.5	33891.7
12.42_401.1637m/z	401.164	12.4241	neg	Bay-41-8543	HMDB0248896	461606			9953906	256498-66-5	AQYFUZRYBJBAGZ-UHFFFAOYSA-N	Organoheterocyclic compounds	Pyrazolopyridines	Unclassified	*	39	4.16	M-H2O-H	C21H21FN8O	-1.7266	1.24722	0.0151409	0.209772	-1.72747	0.301981	6395.96	21180	4448.23	14208.6	1323.33	8465.5	6610.65	3319.41	36875.1	25900.4	23506.6	25433.4	9254.75	6109.61
1.06_380.1125m/z	380.113	1.061	pos	2-Amino-5-[[1-[carboxymethyl(2-hydroxypropanoyl)amino]-1-oxo-3-sulfanylpropan-2-yl]amino]-5-oxopentanoic acid	HMDB0257811				53711283		CAQPTAZCDUFISB-UHFFFAOYSA-N	Nucleosides, nucleotides, and analogues	Purine nucleosides	Purine 2'-deoxyribonucleosides	**	38.6	0	M+H	C13H21N3O8S	0.832751	1.23693	0.00216825	0.106969	1.44939	2.73093	20701.7	7580.47	19973.5	11208.3	27190.9	18490.9	15643.1	31703.6	7002.91	6021.5	7376.46	6126.27	7040.02	11915.6
7.05_278.1517n	261.148	7.0497	pos	Emmotin A		53414	LMPR0103200001		42608142		GRTATZFIZSZURL-GXTWGEPZSA-N	Lipids and lipid-like molecules	Prenol lipids	Isoprenoids	*	53.8	71.6	M+H-H2O, M+NH4, M+Na	C16H22O4	-0.23803	1.21433	0.00850198	0.178763	-1.1254	0.458376	11586.7	25277.8	19661.3	10199.3	12925.5	9373.58	8878.85	8481.91	27834.4	41809.7	20168.1	25190.4	22472	14192.1
0.70_273.0749m/z	273.075	0.699383	pos	Cyclo(his-pro)	HMDB0250630				3085031		NAKUGCPAQTUSBE-UHFFFAOYSA-N	Organic acids and derivatives	Carboxylic acids and derivatives	Amino acids, peptides, and analogues	*	37.6	0	M+K	C11H14N4O2	0.474551	1.2059	0.00859121	0.178996	-1.63179	0.322687	6058.61	18775.5	1312.17	4.23678e-05	2923.47	5367.01	7172.43	19576.6	24769.9	7577.09	15629.1	23950.1	20725.2	20001.5
11.01_479.2654m/z	479.265	11.0132	neg	Erinacine C	HMDB0040389						DMPGFSQMXITJPT-UHFFFAOYSA-N	Organoheterocyclic compounds	Quinolines and derivatives	Benzoquinolines	*	45.6	30.9	M+FA-H	C25H38O6	0.731583	1.20154	0.00559093	0.152029	-1.54171	0.343479	6655.23	19375.9	5526.72	3085.89	11268.5	5794.52	2811.94	11443.8	28790.7	13409.8	29288	11387.2	13641.4	19738.6
7.84_1019.5681m/z	1019.57	7.83813	neg	PS(20:0/LTE4)	HMDB0282079						BXLBGQQZWCWPSJ-BYNDSFQUSA-N	Unclassified	Unclassified	Unclassified	*	37.5	0	M+FA-H	C49H87N2O13PS	3.31493	1.18989	0.0291016	0.264545	-2.51095	0.17544	3184.23	18150	119.688	39.2298	4.23678e-05	14860.4	834.968	3251.09	8791.68	22425.6	2496.92	12339.9	39452.8	23392.9
9.76_385.2018m/z	385.202	9.75588	neg	14beta,15beta-epoxy-3beta,5beta-dihydroxy-19-norbufa-20,22-dienolide			LMST01130071				DVMQYYDEAYYJOG-UBUFQIOTSA-N	Lipids and lipid-like molecules	Steroids and steroid derivatives	Sterols	*	46.7	40.4	M-H	C23H30O5	-0.565016	1.18487	0.0143271	0.206913	1.79091	3.46032	19859.2	5739.11	34129.4	24744	30986.7	8226.5	7255.8	13812.6	5353.15	5103.17	5982.74	5445.8	6482.47	6067.33
1.03_263.1715m/z	263.172	1.03007	pos	Valylglutamine	HMDB0029125	86017			7016044	42854-54-6	XXDVDTMEVBYRPK-XPUUQOCRSA-N	Organic acids and derivatives	Carboxylic acids and derivatives	Amino acids, peptides, and analogues	**	52.2	8.71	M+NH4	C10H19N3O4	0.544063	1.1757	0.0320905	0.274622	3.84655	14.3855	16328.8	1135.09	39603.5	24347.4	22487.3	4556.79	2080.38	4897.35	569.75	972.268	827.982	2481.92	1221.11	737.48
0.79_244.1412n	262.175	0.794483	pos	Isoleucylhydroxyproline	HMDB0028908					90965-80-3	IFZSZULHIWFRSB-KZVJFYERSA-N	Organic acids and derivatives	Carboxylic acids and derivatives	Amino acids, peptides, and analogues	*	36.3	0	M+H, M+NH4	C11H20N2O4	-4.70834	1.16392	0.00969689	0.187432	-0.428336	0.743119	37975.1	51102.4	37900.6	38694.4	38622.5	30198.6	44665.2	37769.4	52620.9	64921.8	44170.1	57714	42039.7	45147.7
12.41_439.2078m/z	439.208	12.4121	neg	N-[(2Z)-2-Methoxyiminopropyl]-7H-purin-6-amine	HMDB0258951				85669800		KWKJDWTYFHVXDB-UHFFFAOYSA-N	Organoheterocyclic compounds	Imidazopyrimidines	Purines and purine derivatives	*	38	0	2M-H	C9H12N6O	1.24665	1.16131	0.0198456	0.230511	-0.673879	0.626819	22294.2	35567.3	21278.4	32512	12567.5	27570.7	23548.7	16288.2	47524.8	34970.5	40355.4	40506.3	27382.4	22664.3
4.60_478.2223m/z	478.222	4.59843	pos	Lipoxin E4		45972	LMFA03040006		9548803		KVXVULITEYDTNN-HGCWDHQMSA-N	Lipids and lipid-like molecules	Fatty Acyls	Eicosanoids	*	49.9	62	M+Na	C23H37NO6S	-2.43019	1.13818	0.0011305	0.0839253	7.49385	180.25	10593.3	58.7701	7303.74	2873.29	6531.41	16240.7	14732	15878.7	4.13001	43.1573	41.813	64.3466	58.3337	140.84
6.26_331.1663m/z	331.166	6.25955	neg	10-alpha-methoxy-9,10-dihydrolysergol	HMDB0060995						JGQZSBLQHCTAJF-NFXPUDJFSA-N	Phenylpropanoids and polyketides	Linear 1,3-diarylpropanoids	Cinnamylphenols	*	38.2	0	M+FA-H	C17H22N2O2	-0.189412	1.13262	0.0350698	0.283644	11.3682	2643.49	14370.5	5.43619	4861.89	3317.94	20246.6	41158	9910.77	6727.81	4.23678e-05	32.6169	4.23678e-05	4.23678e-05	4.23678e-05	4.23678e-05
0.79_245.0592m/z	245.059	0.794483	pos	2-(5-Fluoropentyl)-2-methylmalonic acid	HMDB0254798	410987			57514438		BOYGOAXVKOOCKN-UHFFFAOYSA-N	Lipids and lipid-like molecules	Fatty Acyls	Fatty acids and conjugates	*	37.2	0	M+K	C9H15FO4	3.031	1.12757	0.00027381	0.0486019	1.10949	2.15769	18242.6	8454.68	19248.4	13624.1	24436.3	19265.5	15437.3	17443.8	8128.5	10021.9	6538.82	6062.09	7843.02	12133.7
12.02_351.3135n	374.303	12.0159	pos	Anandamide (20:2, n-6)		36738	LMFA08040002		5283444		MWQCBVWCBTUPDQ-HZJYTTRNSA-N	Lipids and lipid-like molecules	Fatty Acyls	Fatty amides	*	39.4	2.1	M+H, M+Na	C22H41NO2	-0.576354	1.12505	0.0263029	0.256395	-0.183347	0.880658	95055.6	107937	104702	85456.4	92440	96292.5	99873.5	91569.4	127248	103077	108897	100548	100695	107157
15.28_444.3837m/z	444.384	15.2763	pos	4alpha-formyl-ergosta-7,24(241)-dien-3beta-ol	HMDB0304196				50986149		RFKHEEQSEZBUAP-UPNGPVLHSA-N	Lipids and lipid-like molecules	Steroids and steroid derivatives	Ergostane steroids	***	52.8	49	M+NH4	C29H46O2	0.300834	1.12503	0.0261832	0.256395	0.324614	1.25233	74958	59854.9	70535.3	84872.6	86296.7	65767.5	67458.5	74817.4	61629.6	42104.7	63405.6	63965.5	74910.9	53113
13.95_319.2630m/z	319.263	13.946	pos	10Z-Nonadecenoic acid	HMDB0013622	35026	LMFA01030362		5312513	73033-09-7	BBOWBNGUEWHNQZ-KTKRTIGZSA-N	Lipids and lipid-like molecules	Fatty Acyls	Fatty acids and conjugates	**	55.6	0	M+Na	C19H36O2	7.69189	1.12013	0.0385643	0.2937	-0.503993	0.705152	33715.4	47813	33798.1	40317.4	21843.5	36525	41961.2	27847.4	45378.4	49537.2	61504.4	61017.5	39385.2	30055.2
12.25_677.4552m/z	677.455	12.2471	neg	PA(18:3(6Z,9Z,12Z)/18:1(11Z))	HMDB0114979				131821944		AHLPLNNRMHPXKH-YYWRJTHLSA-N	Lipids and lipid-like molecules	Glycerophospholipids	Glycerophosphates	*	38.8	0	M-H2O-H	C39H69O8P	0.104456	1.1185	0.0374243	0.289554	-1.41574	0.374817	8165.14	21784.3	11250	12615	6851.47	13731.5	2598.17	1944.64	24601.4	21376.2	38128.5	32712.3	7478.54	6409
0.83_281.0361m/z	281.036	0.827467	neg	Tazobactam	HMDB0015544	581		C07771	123630	89786-04-9	LPQZKKCYTLCDGQ-WEDXCCLWSA-N	Organic acids and derivatives	Carboxylic acids and derivatives	Amino acids, peptides, and analogues	*	37.2	0	M-H2O-H	C10H12N4O5S	3.54951	1.10628	0.0252757	0.252766	0.525777	1.43971	41371.4	28735.9	32836.5	41893.9	30986.5	42431.8	46986.9	53092.5	30635.3	22524.1	16605.2	32124.7	29934.5	40591.8
10.32_503.2870m/z	503.287	10.3171	neg	glas#22			LMFA13040100		86289880		GPSYFHFACFTZSX-NGGGFPBGSA-N	Lipids and lipid-like molecules	Fatty Acyls	Fatty acyl glycosides	*	46.1	55.2	M-H2O-H	C25H46O11	1.5505	1.10224	0.0123342	0.197394	-0.966487	0.511751	12050.1	23546.9	15535.6	15774	9958.58	15789	7109.14	8134.57	27986.6	35255.6	24108.6	22813.6	20941.7	10175.3
11.45_348.2895m/z	348.289	11.4486	pos	Anandamide	HMDB0004080	3721	LMFA08040001	C11695	5281969	94421-68-8	LGEQQWMQCRIYKG-DOFZRALJSA-N	Organic nitrogen compounds	Organonitrogen compounds	Amines	***	57.5	89.6	M+H	C22H37NO2	-0.732712	1.09829	0.0299969	0.267638	-1.19079	0.438064	9367.17	21383.1	2024.98	4471.51	396.885	14457	12051.7	22800.9	28192.8	23680.1	17290.4	29119.6	21956.1	8059.61
4.89_332.2222m/z	332.222	4.89427	pos	2-(5-((2Z,5Z,8Z,11Z)-tetradeca-2,5,8,11-tetraen-1-yl)furan-2-yl)-ethanoic acid			LMFA01150035		10358283		ASCYUTAWNJPWQT-LTKCOYKYSA-N	Lipids and lipid-like molecules	Fatty Acyls	Fatty Acids and Conjugates	*	39.1	0	M+NH4	C20H26O3	0.558344	1.09789	0.00915207	0.182164	6.89764	119.233	11138.3	93.4169	3617.29	4935.06	2953.2	14252	21994.6	19078	50.386	126.183	119.29	38.9424	85.9834	139.717
10.43_1155.4885m/z	1155.49	10.432	neg	Netupitant	HMDB0255552						WAXQNWCZJDTGBU-UHFFFAOYSA-N	Phenylpropanoids and polyketides	Flavonoids	Flavonoid glycosides	*	37.3	0	2M-H	C30H32F6N4O	-0.289243	1.08929	0.00282826	0.118897	-3.36497	0.0970606	1066.48	10987.8	4.23678e-05	4733.14	4.23678e-05	866.097	4.23678e-05	799.656	14995.6	17509.4	9878.17	14556.5	7450.59	1536.61
7.24_185.1536m/z	185.154	7.23663	pos	omega-hydroxy hendecanoic acid		35416	LMFA01050035		77237		KNRCBASNXNXUQQ-UHFFFAOYSA-N	Lipids and lipid-like molecules	Fatty Acyls	Fatty Acids and Conjugates	*	47.7	40.9	M+H-H2O	C11H22O3	-0.0815225	1.08691	0.0414403	0.300127	-1.21129	0.431882	8763.47	20291.4	12789.9	6435.57	12794.7	7472.92	5925.16	7162.61	18738	15746.6	14652.4	23953.7	41328	7329.68
0.75_262.1890n	263.196	0.746283	pos	1,4,10,13-Tetraoxa-7,16-diazacyclooctadecane	HMDB0244223	458479			72805		NLMDJJTUQPXZFG-UHFFFAOYSA-N	Organic nitrogen compounds	Organonitrogen compounds	Amines	*	38.7	0	M+H-H2O, M+H	C12H26N2O4	-0.913736	1.08559	0.0114334	0.194176	0.744675	1.6756	28200.5	16830.1	28773	27684.3	34816.7	37774.4	19179.9	20974.3	15126.7	26056.9	16960.9	12276	18660.4	11899.6
10.88_297.2436m/z	297.244	10.8816	neg	Ricinoleic acid	HMDB0034297			C08365	5282942	141-22-0	WBHHMMIMDMUBKC-XFXZXTDPSA-N	Lipids and lipid-like molecules	Fatty Acyls	Fatty acids and conjugates	***	63.8	52.5	M-H	C18H34O3	0.180117	1.08317	0.00851972	0.178763	0.464145	1.3795	40373.4	29266.7	31627.9	50803.4	47568.7	30985.8	41100.2	40154.4	29746.1	26862.6	31419.3	26800.2	31491.3	29280.7
7.83_612.2551m/z	612.255	7.83058	pos	Benzoylhypaconine	HMDB0249052				13343336		MDFCJNFOINXVSU-UHFFFAOYSA-N	Lipids and lipid-like molecules	Prenol lipids	Diterpenoids	*	55	85.4	M+K	C31H43NO9	-3.28131	1.07881	0.0104465	0.189478	-1.44307	0.367784	6474.28	17603.5	2089.27	1139.83	1872.87	13714.8	8202.6	11826.4	12813.1	17409.9	7414.55	19061.4	24709.6	24212.4
10.35_605.3214m/z	605.321	10.3547	neg	Tribenzylamine n-oxide		24081			3624962	6852-46-6	KIAARAUZZLGXFK-UHFFFAOYSA-N	Unclassified	Unclassified	Unclassified	*	37.7	0	2M-H	C21H21NO	6.70787	1.07656	0.013725	0.204255	-0.693451	0.618373	16378.9	26487.1	16948.8	17282.3	20415.5	19832.4	9797.68	13996.5	34084.1	23260.4	31825.4	27817.1	28271.4	13664
10.98_416.2539n	399.251	10.9762	pos	Efegatran	HMDB0251713				14632458		KAGLWQUWUNBAOO-UHFFFAOYSA-N	Organic acids and derivatives	Carboxylic acids and derivatives	Amino acids, peptides, and analogues	*	46.6	39.9	M+H-H2O, M+H	C21H32N6O3	0.674106	1.06975	0.000582219	0.063967	0.316979	1.24572	43675.6	35060.5	42757.3	46653.2	40853.3	45411.3	48152	38226.2	32363.9	35154.5	34878.6	36192.5	33579.5	38194
8.70_476.2476m/z	476.248	8.70318	neg	N-Docosahexaenoyl Cysteine	HMDB0242011						GLCDOEPCZJRDLV-UHFFFAOYSA-N	Unclassified	Unclassified	Unclassified	*	37	0	M+FA-H	C25H37NO3S	0.0166517	1.06572	0.0218155	0.240352	-2.67559	0.156519	2069.7	13223.3	2014.2	4.23678e-05	777.31	4160.32	3833.88	1632.48	8282.52	2133.74	2874.78	21293.7	24131.6	20623.7
0.73_102.0913m/z	102.091	0.731017	pos	N-Ethylpropionamide	HMDB0302430	340840			521324		ABMDIECEEGFXNC-UHFFFAOYSA-N	Organic acids and derivatives	Carboxylic acids and derivatives	Carboxylic acid derivatives	*	41.8	15.1	M+H	C5H11NO	-0.607513	1.06111	0.0439161	0.306163	-1.17027	0.444337	9627.57	21667.3	10434.5	9790.07	10808.1	11282.4	7790.72	7659.63	40695.8	27200.5	28374.6	14835.4	12899.7	5997.55
0.73_345.0968m/z	345.097	0.725633	neg	7,2'-Dihydroxy-8,4'-dimethoxyisoflav-3-ene		48314	LMPK12080070		14427399		BEHFIWGOMWQJQZ-UHFFFAOYSA-N	Lipids and lipid-like molecules	Polyketides	Flavonoids	*	36.2	0	M+FA-H	C17H16O5	-3.89994	1.06042	0.0244034	0.249546	-1.58675	0.332922	5662.02	17007.1	584.137	3218.36	11283.8	3465.31	9232.85	6187.62	11670.3	4542.78	28388.8	11344.3	28102.4	17993.8
14.71_648.5195m/z	648.52	14.7073	pos	DG(20:5(6E,8Z,11Z,14Z,17Z)-OH(5)/0:0/i-16:0)	HMDB0299275						AERQBFAHGMLGBJ-DCBVXVLXSA-N	Unclassified	Unclassified	Unclassified	*	39.4	0	M+NH4	C39H66O6	-0.353562	1.05819	0.0437632	0.306163	-1.18475	0.439901	8884.78	20197.2	12097.7	8163.39	14417.3	1174.69	9163.3	8292.37	13365.8	10579.3	23696	29011.3	36097.3	8433.75
11.87_401.1426m/z	401.143	11.8681	neg	N-(6,8-Difluoro-2-methyl-4-quinolinyl)-N'-[4-(dimethylamino)phenyl]urea	HMDB0245742				4331799		JTARFZSNUAGHRB-UHFFFAOYSA-N	Organoheterocyclic compounds	Quinolines and derivatives	Haloquinolines	*	38.8	0	M+FA-H	C19H18F2N4O	-1.18356	1.05338	0.0324055	0.275433	-1.455	0.364756	6880.94	18864.5	4879.73	15530	1122.45	8651.43	5745.39	5356.66	33202.2	28654.9	18150	18894.5	5796.56	8488.84
3.05_192.0425n	210.076	3.04918	pos	Scopoletin	HMDB0034344	6956		C01752	5280460	92-61-5	RODXRVNMMDRFIK-UHFFFAOYSA-N	Phenylpropanoids and polyketides	Coumarins and derivatives	Hydroxycoumarins	*	50	54.3	M+H, M+NH4	C10H8O4	1.33101	1.03785	7.00678e-07	0.00817516	3.2861	9.75468	8400.25	861.15	8462.27	7043.32	8825.12	6110.56	9010.21	10950	1140.6	769.086	962.942	811.368	676.441	806.468
10.44_457.2362m/z	457.236	10.4404	neg	[(1R)-1-(hydroxymethyl)-2-phosphonooxy-ethyl] (5Z,8Z,11Z,14Z)-icosa-5,8,11,14-tetraenoate			LMGP10050039		53481444		BDCFJMBXZCIVRH-NZRYSPDRSA-N	Lipids and lipid-like molecules	Glycerophospholipids	Glycerophosphates	*	39.8	8.6	M-H	C23H39O7P	0.2803	1.03712	0.00207969	0.104682	-1.46596	0.361994	5114.28	14128.1	4952.17	9501.82	4716.9	5184.3	2234.36	4096.09	15959.3	20528.6	14012.2	16875.2	10110	7283.03
1.53_625.1609m/z	625.161	1.52767	neg	2-Methylthioadenosine	HMDB0245242				235484		AJNDEAZTAFKOOO-UHFFFAOYSA-N	Nucleosides, nucleotides, and analogues	Purine nucleosides	Unclassified	*	38.1	0	2M-H	C11H15N5O4S	-1.29495	1.03631	0.00276989	0.117519	1.19399	2.28785	16701.7	7300.15	16344.4	15624.8	21136.3	24240.6	12467.5	10396.3	6617.38	5660.94	3775.06	6913.3	10211.9	10622.4
10.43_455.2037m/z	455.204	10.431	pos	Melleolide G	HMDB0038793	93436			14166120	117258-75-0	GGQLLLSSCCXUBL-UHFFFAOYSA-N	Lipids and lipid-like molecules	Prenol lipids	Sesquiterpenoids	*	38.8	0	M+Na	C24H32O7	-0.696324	1.03545	0.00634554	0.160174	27.8134	2.35871e+08	9993.35	4.23678e-05	20090.4	5793.55	13148.1	3459.51	2490.41	14978.2	4.23678e-05	4.23678e-05	4.23678e-05	4.23678e-05	4.23678e-05	4.23678e-05
7.83_999.6000m/z	999.6	7.83058	pos	PIM1(18:0/16:1(9Z))			LMGP15010016		126457384		BEWOGUGVBXIOMM-UICDVBEPSA-N	Lipids and lipid-like molecules	Glycerophospholipids	Glycerophosphoinositolglycans	*	38.8	0	M+H	C49H91O18P	-1.54086	1.03364	0.03326	0.278143	-2.22443	0.213984	3195.98	14935.6	4.23678e-05	4.23678e-05	108.271	14144.3	1177.92	3745.32	6733.07	14728.1	2007.94	12643.4	28498	25003
4.81_345.1546m/z	345.155	4.80777	pos	Butyl (S)-3-hydroxybutyrate glucoside	HMDB0031694	87870			76463851		YUPCLHHTUNDMAN-UHFFFAOYSA-N	Lipids and lipid-like molecules	Fatty Acyls	Fatty acyl glycosides	**	48.6	0	M+Na	C14H26O8	8.07145	1.03114	0.0399968	0.297902	4.74012	26.725	12274.1	459.276	5860.95	4165.55	4229.36	36269.8	12930.1	10189.1	487.159	330.94	216.45	588.019	654.218	478.867
0.79_166.0854m/z	166.085	0.794483	pos	Oxidized-adrenal-ferredoxin	HMDB0062515	43322			838	329-65-7	UCTWMZQNUQWSLP-UHFFFAOYSA-N	Benzenoids	Phenols	Benzenediols	**	57.5	0	M+H-H2O	C9H13NO3	-4.72104	1.02774	7.93365e-06	0.0160393	1.06193	2.08772	14729.3	7055.19	15012.8	16534.2	16604.5	15054.1	14280.2	10889.7	6768.49	6100.88	7308.82	7646.03	8214.85	6292.05
11.43_362.2684m/z	362.268	11.4303	pos	N-Arachidonoylglycine	HMDB0005096	36676	LMFA08020003		5283389	179113-91-8	YLEARPUNMCCKMP-DOFZRALJSA-N	Organic acids and derivatives	Carboxylic acids and derivatives	Amino acids, peptides, and analogues	***	64.9	87	M+H	C22H35NO3	-1.52669	1.02762	0.0149242	0.209437	-0.777597	0.583337	14351.2	24601.8	6815.87	12504	5201.9	15537.1	21021.4	25026.8	25590.3	23126.5	28580.9	23450.7	27860.4	19002.3
0.74_157.0367m/z	157.037	0.741033	neg	Allantoin	HMDB0000462	89		C01551	204	97-59-6	POJWUDADGALRAB-UHFFFAOYSA-N	Organoheterocyclic compounds	Azoles	Imidazoles	***	73.4	87.2	M-H	C4H6N4O3	-0.185502	1.02432	0.0245239	0.250006	-0.193844	0.874273	70009.7	80077.6	65115.7	73366.1	66420.1	66161	76749.1	72246.2	88851.6	70316.1	74606.2	90510.6	79180.8	77000.2
12.03_262.2295n	263.237	12.0345	pos	6,10,14-Trimethyl-5,9,13-pentadecatrien-2-one	HMDB0034495	89972			1711944	762-29-8	LTUMRKDLVGQMJU-HSVQFRAPSA-N	Lipids and lipid-like molecules	Prenol lipids	Diterpenoids	***	61.9	33.2	M+H-H2O, M+H	C18H30O	-0.512177	1.01957	0.0378224	0.29109	-1.01189	0.495898	11726.6	23647.2	10731.2	19176.3	5357.31	9714.05	12142.8	13238	21788.3	39513	20063.4	35138.6	13478.6	11901.4
10.30_530.2516m/z	530.252	10.3043	pos	8-desoxy-19,20-epoxycytochalasin C			LMPK11000023				ABSZCAQHXWKEEY-NILIJMHGSA-N	Lipids and lipid-like molecules	Polyketides	Cytochalasins	*	37.6	0	M+Na	C30H37NO6	0.518691	1.01406	0.0149185	0.209437	-0.860417	0.550794	12876.9	23378.8	10491.5	17125.6	5829.65	21489.1	10154.3	12171.2	18801.1	34149.3	15428.9	28090.3	22889.3	20914
12.02_377.1427m/z	377.143	12.0229	neg	Pradofloxacin	HMDB0256725				9865506		LZLXHGFNOWILIY-UHFFFAOYSA-N	Organoheterocyclic compounds	Quinolines and derivatives	Quinoline carboxylic acids	*	42.3	15.7	M-H2O-H	C21H21FN4O3	1.83993	1.01115	0.0357763	0.285477	-2.01191	0.247945	3759.92	15164.3	3679.3	8410.07	786.581	4174.29	2351.61	3157.65	24462	32134.6	12325.5	13935.6	4434.86	3693.35
12.26_355.3450n	378.334	12.2604	pos	Arachidoyl Ethanolamide	HMDB0248559	3723	LMFA08040038		3787294	94421-69-9	AUJVQJHODMISJP-UHFFFAOYSA-N	Organic nitrogen compounds	Organonitrogen compounds	Amines	*	48.3	47.5	M+H, M+Na	C22H45NO2	-0.210586	1.00757	0.00843487	0.178763	-0.334873	0.792854	34288.4	43246.8	36080.1	34150.7	39717.3	34109.1	30713	30960.1	47173.5	36492.2	39560.6	38139.2	49481.5	48633.4
5.11_557.1469m/z	557.147	5.10693	neg	Dehydrophthalocyanine	HMDB0250957				129638085		ZETFJCOBPQNMFJ-UHFFFAOYSA-N	Organoheterocyclic compounds	Isoindoles and derivatives	Isoindoles	*	36.1	0	M+FA-H	C32H16N8	-2.13396	1.00715	0.0193101	0.228191	-1.89443	0.26898	3410.24	12678.4	4591.69	1498.2	4169.01	4090.85	3263.51	2848.2	8853.11	5983.61	7776.64	23142.5	22927	7387.74
10.84_432.2989n	433.306	10.843	pos	N-arachidonoyl glutamine		75508	LMFA08020126		52922070		XNAYJICFDMIWEO-HUDVFFLJSA-N	Lipids and lipid-like molecules	Fatty Acyls	Fatty amides	*	39.1	0	M+H, M+Na	C25H40N2O4	0.203183	1.00269	0.0303499	0.269177	-1.35443	0.391089	6596.57	16867.2	2559.48	4615.36	2228.09	8142.82	7147.58	14886.1	27619.1	21995.3	22328.6	13024.9	13002.2	3232.94
5.69_568.2024m/z	568.202	5.68688	pos	4'-Hydroxyacetophenone 4'-[4-hydroxybenzoyl-(->5)-apiosyl-(1->2)-glucoside]	HMDB0036332	91476			85277745	228405-07-0	MQJMZJDOAGOKBY-UHFFFAOYSA-N	Organic oxygen compounds	Organooxygen compounds	Carbohydrates and carbohydrate conjugates	***	69.3	65.9	M+NH4	C26H30O13	-0.0419023	1.00025	0.0322566	0.27492	1.47109	2.77231	16937.3	6109.47	9735.86	14815.9	9191.25	36726.5	18131.7	13022.9	3677.61	3133.62	3537.4	8895.04	9743.05	7670.08

## Sheet: LDG-vs-CG-diff-metabolites
ID	m/z	Retention time (min)	Ion mode	Metabolites	HMDB	METLIN	Lipidmaps	kegg	PubChem	CAS	InChIKey	Super Class	Class	Sub Class	level	Score	Fragmentation Score	Adducts	Formula	Mass Error (ppm)	VIP	P-value	adj.P-value	log2(FC)	FC	average(LDG)	average(CG)	LDG_1	LDG_2	LDG_3	LDG_4	LDG_5	LDG_6	CG_1	CG_2	CG_3	CG_4	CG_5	CG_6
0.73_134.1175m/z	134.117	0.731017	pos	Diisopropanolamine	HMDB0251354	44741			8086	110-97-4	LVTYICIALWPMFW-UHFFFAOYSA-N	Organic nitrogen compounds	Organonitrogen compounds	Amines	**	63.7	25.7	M+H	C6H15NO2	-0.547702	12.4249	0.0263503	0.272918	-1.22298	0.428397	599742	1.39997e+06	854412	504029	359449	520822	533117	826627	2.50139e+06	1.66616e+06	1.70649e+06	1.20753e+06	912535	405697
0.68_184.0733m/z	184.073	0.681467	pos	4-Trimethylammoniobutanoic acid	HMDB0001161			C01181	725		JHPNVNIEXXLNTR-UHFFFAOYSA-N	Lipids and lipid-like molecules	Fatty Acyls	Fatty acids and conjugates	***	58.9	48.3	M+K	C7H15NO2	-0.669985	11.6168	0.0457028	0.34716	-0.506539	0.703909	1.86385e+06	2.64786e+06	990650	2.04061e+06	1.6316e+06	2.31498e+06	1.97495e+06	2.23033e+06	2.20282e+06	1.73678e+06	3.71863e+06	2.43341e+06	2.88155e+06	2.91399e+06
10.26_499.2696n	544.268	10.2595	neg	Osimertinib	HMDB0248778				71496458		DUYJMQONPNNFPI-UHFFFAOYSA-N	Organoheterocyclic compounds	Indoles and derivatives	N-alkylindoles	*	48.5	46.9	M-H, M+FA-H	C28H33N7O2	0.0185709	9.92024	0.0479282	0.353366	-0.541	0.687294	1.25581e+06	1.82718e+06	1.43132e+06	1.46683e+06	1.53313e+06	682276	895541	1.52575e+06	1.63355e+06	2.02785e+06	1.48975e+06	2.76045e+06	1.50241e+06	1.54905e+06
10.26_854.5922m/z	854.592	10.2595	neg	PE-NMe(20:4(8Z,11Z,14Z,17Z)/20:0)	HMDB0113462				131820574		ADQXVYMCYQCHDG-QLXZSTJSSA-N	Lipids and lipid-like molecules	Glycerophospholipids	Glycerophosphoethanolamines	*	56.9	89.3	M+FA-H	C46H84NO8P	0.626224	9.85173	0.0208292	0.243878	0.792949	1.73261	1.24663e+06	719507	804645	1.71639e+06	1.58141e+06	1.55663e+06	966453	854233	570940	682347	975092	884756	367624	836281
10.29_477.2855n	476.278	10.2933	neg	LysoPE(0:0/18:2(9Z,12Z))	HMDB0011477	62265	LMGP02050041		53480926		SVRBKLJIDJHADS-USWSLJGRSA-N	Lipids and lipid-like molecules	Glycerophospholipids	Glycerophosphoethanolamines	***	76.3	98	M-H, 2M-H	C23H44NO7P	-0.167417	9.69301	0.0255162	0.27025	-0.831444	0.561967	652969	1.16194e+06	404967	946652	619506	318408	564627	1.06365e+06	1.15625e+06	1.32844e+06	680488	1.18604e+06	1.75132e+06	869085
6.26_330.1681n	329.161	6.25955	neg	tetranor-PGFM	HMDB0258925	36188			3082337	23109-94-6	IGRHJCFWWOQYQE-UHFFFAOYSA-N	Lipids and lipid-like molecules	Fatty Acyls	Eicosanoids	*	52.9	68	M-H, M+FA-H, 2M-H	C16H26O7	0.691484	9.22706	0.0189555	0.234036	7.00771	128.686	441086	3427.62	234181	951294	263224	53208.4	900873	243732	3277.03	4430.34	3586.29	3259.06	2932.29	3080.71
12.42_403.1581m/z	403.158	12.4241	neg	Sericetin		44599	LMPK12111649		4020240	42438-75-5	BPGVKIFGOXGHPB-UHFFFAOYSA-N	Lipids and lipid-like molecules	Polyketides	Flavonoids	*	41.9	19.2	M-H	C25H24O5	7.54013	7.72735	0.0249853	0.268061	-1.44361	0.367646	180594	491217	245023	227608	295248	17214.6	87180	211290	866093	603652	558489	562247	216284	140537
1.09_247.1420n	248.149	1.09353	pos	3-Hydroxybutyrylcarnitine	HMDB0013127					1469900-92-2	UEFRDQSMQXDWTO-BDAKNGLRSA-N	Lipids and lipid-like molecules	Fatty Acyls	Fatty acid esters	***	69.9	87.1	M+H, M+Na	C11H21NO5	0.0821944	7.27932	0.00471367	0.133719	-0.678447	0.624837	397468	636114	251957	496719	304319	374792	513100	443923	475350	516746	693878	793754	715824	621135
0.70_148.0604m/z	148.06	0.699383	pos	L-Glutamic acid	HMDB0000148	19		C00025	33032	56-86-0	WHUUTDBJXJRKMK-VKHMYHEASA-N	Organic acids and derivatives	Carboxylic acids and derivatives	Amino acids, peptides, and analogues	***	74.3	93.4	M+H	C5H9NO4	-0.382777	6.7197	0.0380454	0.319163	-0.35119	0.783937	867607	1.10673e+06	747377	866082	661401	951982	1.00614e+06	972659	1.35167e+06	1.05152e+06	830455	1.30889e+06	1.1474e+06	950445
1.05_132.0245n	150.058	1.04575	pos	3-Methyl sulfolene	HMDB0059667	343032			70941		FAYFWMOSHFCQPG-UHFFFAOYSA-N	Organoheterocyclic compounds	Dihydrothiophenes	Unclassified	*	39.7	3.49	M+H, M+NH4	C5H8O2S	0.23855	6.55493	0.00379164	0.122038	-0.356987	0.780793	727483	931723	848475	846520	679303	557325	762539	670736	1.03448e+06	955403	911161	870344	973577	845376
4.85_344.1474n	343.14	4.8452	neg	Iridotrial glucoside		41169	LMPR0102070024	C11653	443335		MRIFZKMKTDPBHR-MDHPXLNESA-N	Lipids and lipid-like molecules	Prenol lipids	Isoprenoids	*	50.2	55.3	M-H, M+FA-H	C16H24O8	0.798503	6.21512	0.00326597	0.115107	7.39128	167.879	180366	1074.38	55180	217510	59494.1	138248	290701	321063	754.212	642.974	739.244	1965.77	1138.98	1205.1
0.68_120.1019m/z	120.102	0.681467	pos	Tetrahydro-2-methyl-3-furanol	HMDB0039799	94348			34742	29848-44-0	ZFVWBUVYNPLIIS-UHFFFAOYSA-N	Organoheterocyclic compounds	Tetrahydrofurans	Unclassified	*	46.9	36.4	M+NH4	C5H10O2	-0.408285	6.00493	0.0341932	0.307046	-1.55858	0.339486	101952	300314	155928	86258.1	58740.6	84767.3	83686.6	142334	591889	388283	399422	206339	151540	64411.8
11.30_922.5791m/z	922.579	11.3022	neg	PE(DiMe(13,5)/20:3(5Z,11Z,14Z)-O(8,9))	HMDB0284858						AMZLUKMPIORVRI-LMKNVAIPSA-N	Unclassified	Unclassified	Unclassified	*	37.3	0	M+FA-H	C49H84NO10P	-2.6882	5.94173	0.0144974	0.210383	1.0835	2.11917	345011	162805	237503	520776	488818	392329	245897	184743	128402	152163	214171	204287	81231.8	196572
0.73_251.1964m/z	251.196	0.731017	pos	Ethyl dodecanoate	HMDB0033788	316864	LMFA07010464		7800	106-33-2	MMXKVMNBHPAILY-UHFFFAOYSA-N	Lipids and lipid-like molecules	Fatty Acyls	Fatty acid esters	*	37.3	0	M+Na	C14H28O2	-7.74944	5.76019	0.0195759	0.236441	-1.17068	0.444213	133065	299553	212067	102493	75831.2	107513	114495	185993	447360	394851	385085	270596	219163	80259.6
3.23_496.1089n	495.102	3.22627	neg	Daf-FM DA	HMDB0250829	451837			2762646		BEVHTVRRVVEMEF-UHFFFAOYSA-N	Organoheterocyclic compounds	Benzopyrans	1-benzopyrans	*	38.2	0.0315	M-H, 2M-H	C25H18F2N2O7	1.44227	5.26195	0.0343823	0.307928	0.465527	1.38082	623720	451702	705566	785183	491318	779746	498498	482007	440269	347215	392013	476106	601807	452799
0.71_165.0404m/z	165.04	0.709183	neg	Erythrose	HMDB0002649			C01796	439574		FMAORJIQYMIRHF-HERZVMAMSA-N	Organic oxygen compounds	Organooxygen compounds	Carbohydrates and carbohydrate conjugates	***	66.3	52.3	M+FA-H	C4H8O4	-0.358335	5.19651	0.00133272	0.0767878	-0.764157	0.588797	163670	277974	155538	133530	148772	166001	171068	207113	240677	217168	311197	364801	227507	306493
12.25_427.1581m/z	427.158	12.2471	neg	Crosatoside B	HMDB0039253				131752590		BMZAMCOQJLZXCY-UHFFFAOYSA-N	Organic oxygen compounds	Organooxygen compounds	Carbohydrates and carbohydrate conjugates	*	37.1	0	M-H2O-H	C20H30O11	-6.34396	5.00825	0.0193335	0.235425	-1.81959	0.283301	49629.4	175183	80558.2	88066.9	76545	1874.83	16361.9	34369.6	228332	214596	282953	236978	50833.6	37402.3
4.44_344.1472n	343.14	4.44232	neg	(-)-erythro-Anethole glycol 2-glucoside	HMDB0033067	88959			45360332	217973-39-2	JYWSARFDLXXOHT-UHFFFAOYSA-N	Organic oxygen compounds	Organooxygen compounds	Carbohydrates and carbohydrate conjugates	*	49.4	50.2	M-H, 2M-H	C16H24O8	0.261652	4.86886	0.0258556	0.271625	7.75266	215.666	133183	617.542	17507.8	97951.6	22874.5	102231	337221	221312	503.132	295.984	242.546	1365.96	634.224	663.409
4.81_367.1366m/z	367.137	4.80777	pos	Elafibranor	HMDB0251730						AFLFKFHDSCQHOL-UHFFFAOYSA-N	Phenylpropanoids and polyketides	Linear 1,3-diarylpropanoids	Chalcones and dihydrochalcones	*	45.9	44	M+H-H2O	C22H24O4S	0.963393	4.79125	0.00452689	0.131953	7.48413	179.04	110203	615.525	31052.6	110660	31859.2	97476.2	185172	205000	533.438	238.128	320.114	1357.5	446.026	797.944
5.69_513.2760n	496.273	5.68688	pos	Sulfolithocholylglycine	HMDB0002639	6725	LMST05030004	C11301	72222	15324-64-8	FHXBAFXQVZOILS-OETIFKLTSA-N	Lipids and lipid-like molecules	Steroids and steroid derivatives	Bile acids, alcohols and derivatives	*	53.2	74.2	M+H-H2O, M+NH4	C26H43NO7S	-0.00183422	4.4648	0.0168401	0.223334	0.87152	1.82959	237132	129609	161423	261691	226119	332808	149139	291610	171942	223174	76418.9	106808	111323	87990.1
2.11_250.0935m/z	250.094	2.10505	pos	3'-Azido-3'-deoxythymidine, 98%	HMDB0246088				5726		HBOMLICNUCNMMY-UHFFFAOYSA-N	Nucleosides, nucleotides, and analogues	Pyrimidine nucleosides	Pyrimidine 2',3'-dideoxyribonucleosides	*	50.5	65.4	M+H-H2O	C10H13N5O4	0.252263	4.42685	0.0491493	0.356274	0.446803	1.36302	455983	334540	347689	401983	392069	506818	528738	558601	279193	229597	230942	397099	402094	468313
11.69_402.2252n	425.214	11.6944	pos	5S-HETE di-endoperoxide		74966	LMFA03000011		52921873		DOXGUXRZAOCYPM-IPIAXWAYSA-N	Lipids and lipid-like molecules	Fatty Acyls	Eicosanoids	*	43.9	23.2	M+Na, M+K, M+H	C20H34O8	-0.500098	4.3594	0.00603772	0.146842	-0.391049	0.762575	292999	384224	267709	322703	272210	277363	303633	314376	391038	369498	500594	347996	336736	359480
0.72_428.0367m/z	428.037	0.715617	pos	ADP	HMDB0001341	6175		C00008	6022	58-64-0	XTWYTFMLZFPYCI-KQYNXXCUSA-N	Nucleosides, nucleotides, and analogues	Purine nucleotides	Purine ribonucleotides	***	70.3	79.9	M+H	C10H15N5O10P2	0.0241459	4.3072	0.00702439	0.156506	0.575042	1.48972	260590	174926	213544	226689	250359	291860	321431	259658	138167	136309	157755	158892	198763	259668
6.46_330.1680n	329.161	6.45567	neg	Picrocrocin	HMDB0005796				22833654		WMHJCSAICLADIN-VKSCUUAMSA-N	Organic oxygen compounds	Organooxygen compounds	Carbohydrates and carbohydrate conjugates	***	51.4	60.7	M-H, 2M-H	C16H26O7	0.524764	4.30482	0.0222751	0.251505	7.06952	134.319	97618.3	726.764	62639.6	245827	64811.7	11523.2	159235	41673.4	529.017	608.164	548.418	901.944	405.277	1367.77
11.27_250.1449m/z	250.145	11.2698	neg	3,4-Dimethylethcathinone		96622			82100164		AOXOTNQJKCPNGK-UHFFFAOYSA-N	Unclassified	Unclassified	Unclassified	*	39.8	0	M+FA-H	C13H19NO	0.076625	4.23816	0.00103949	0.0689133	0.3291	1.25623	407442	324337	416687	407417	399106	460612	397070	363757	293049	278281	345417	350325	351324	327627
0.83_151.0261m/z	151.026	0.827467	neg	Glycolic acid	HMDB0000115	3219		C03547	757	79-14-1	AEMRFAOFKBGASW-UHFFFAOYSA-N	Organic acids and derivatives	Hydroxy acids and derivatives	Alpha hydroxy acids and derivatives	**	57.8	0	2M-H	C2H4O3	8.73789	4.06208	0.00300018	0.112194	-0.287526	0.819306	324887	396539	330492	305141	329644	370287	326265	287493	451184	414284	385513	392769	391908	343578
0.67_146.0692n	145.062	0.674617	neg	L-Glutamine	HMDB0000641	5614		C00064	5961	56-85-9	ZDXPYRJPNDTMRX-VKHMYHEASA-N	Organic acids and derivatives	Carboxylic acids and derivatives	Amino acids, peptides, and analogues	***	70.1	97	M-H, M+FA-H, M-H2O-H	C5H10N2O3	0.437955	4.05217	0.0286869	0.283204	0.74158	1.67201	228725	136796	276201	168497	284878	150412	171422	320936	198101	158250	93870.5	70143	173246	127168
5.11_343.1401m/z	343.14	5.10693	neg	2-Octenedioic acid	HMDB0000341	5330				5698-50-0	BNTPVRGYUHJFHN-HWKANZROSA-N	Lipids and lipid-like molecules	Fatty Acyls	Fatty acids and conjugates	***	60.1	44.7	2M-H	C8H12O4	0.786911	4.01581	0.00386073	0.122714	5.3767	41.5478	76488.7	1840.98	26047.6	131309	27752.4	43854.4	113301	116667	1025.96	794.307	704.668	3114.97	2586.93	2819.05
1.81_402.2232n	403.231	1.8076	pos	AL 8810		45689			5311238	246246-19-5	WTYSXBKKVNOOIX-JTGCGUAKSA-N	Unclassified	Unclassified	Unclassified	*	36.4	0	M+H, M+Na	C24H31FO4	6.45545	4.00662	0.0317762	0.297194	-0.468917	0.722507	243768	337392	193053	236922	161673	198921	320189	351852	346856	402805	277482	391089	293323	312800
2.68_219.1108n	218.103	2.68368	neg	Pantothenic acid	HMDB0000210	241		C00864	6613	79-83-4	GHOKWGTUZJEAQD-ZETCQYMHSA-N	Organic oxygen compounds	Organooxygen compounds	Alcohols and polyols	***	70.3	98.2	M-H, 2M-H	C9H17NO5	0.413253	4.00172	0.00144045	0.0799429	-0.361311	0.778457	236178	303393	229105	218976	226922	222188	257168	262711	310854	338889	317051	321121	286301	246143
6.56_431.1780m/z	431.178	6.55992	pos	(-)-alpha-Narcotine	HMDB0033439	43280		C09592	275196	128-62-1	AKNNEGZIBPJZJG-MSOLQXFVSA-N	Alkaloids and derivatives	Phthalide isoquinolines	Unclassified	*	36.8	0	M+NH4	C22H23NO7	-8.01703	4.00056	0.0238891	0.261469	0.732707	1.66175	226785	136473	247650	169167	140801	209870	220329	372892	114462	149716	160747	115677	144418	133820
5.02_345.1558m/z	345.156	5.02187	neg	Nepetaside	HMDB0038149	92890			14020067	114076-56-1	CUIDBUWFCFYEPL-UHFFFAOYSA-N	Lipids and lipid-like molecules	Prenol lipids	Terpene glycosides	*	51.4	61.3	M-H	C16H26O8	0.961736	3.81851	0.00550024	0.140118	4.66123	25.3028	72543.4	2867	14131.5	108812	19224.6	61582	127284	104227	587.777	336.374	377.494	5232.61	5896.11	4771.67
0.69_210.0377n	191.02	0.69395	neg	Galactaric acid	HMDB0000639	5612	LMFA01170107	C00879	3037582	526-99-8	DSLZVSRJTYRBFB-DUHBMQHGSA-N	Organic oxygen compounds	Organooxygen compounds	Carbohydrates and carbohydrate conjugates	***	61.9	37.3	M-H2O-H, M-H	C6H10O8	0.451511	3.6153	0.0325246	0.300341	0.337646	1.26369	362494	286853	318762	295485	327140	437159	374454	421962	321364	268089	267706	211269	337574	315113
11.39_807.0679m/z	807.068	11.3929	pos	Granatin A	HMDB0039271	93860			131752596	73683-70-2	BEAQEKRAXFQCBO-UHFFFAOYSA-N	Phenylpropanoids and polyketides	Tannins	Hydrolyzable tannins	*	36.7	0	M+Na	C34H24O22	3.55449	3.50135	0.0165821	0.222553	1.61517	3.06347	100204	32709.3	75958.7	151763	179869	83272.3	51186.4	59174	17753.5	16926.9	59344.7	64266.8	14725.9	23238.1
0.60_164.0669m/z	164.067	0.595967	pos	Ammonia aspartate	HMDB0248341				129713638		GOVCRMWFUKQONY-UHFFFAOYSA-N	Organic acids and derivatives	Carboxylic acids and derivatives	Amino acids, peptides, and analogues	*	39.1	16.3	M+NH4	C4H6N2O4	2.11116	3.49111	0.0478211	0.353135	0.43409	1.35106	292476	216479	264028	307584	245094	367729	265516	304906	118943	147993	218885	248174	269224	295656
3.46_561.5406m/z	561.541	3.4571	neg	Laurocapram	HMDB0253992						AXTGDCSMTYGJND-UHFFFAOYSA-N	Organoheterocyclic compounds	Lactams	Caprolactams	*	37.8	0	2M-H	C18H35NO	7.40951	3.4156	0.00539523	0.139109	1.56777	2.96445	85463	28829.3	72697.7	101185	74129	148223	55828.7	60715.8	15249.3	13112	11803.7	30307.9	51261.3	51241.5
0.84_295.0663m/z	295.066	0.84175	pos	Pyridine N-oxide glucuronide	HMDB0061177				131770061		KITHDEVLYXWSPB-ZBGLXGBJSA-O	Organic oxygen compounds	Organooxygen compounds	Carbohydrates and carbohydrate conjugates	*	47.1	40.7	M+Na	C11H14NO7+	0.31715	3.35332	0.0331737	0.303096	-0.937015	0.522312	69618.3	133289	106756	62199.9	71101.3	58003.3	68562.5	51086.8	193714	195904	164280	99376.3	97116.5	49341.1
0.81_576.1718m/z	576.172	0.810317	pos	Cartormin	HMDB0035209	90527			131751684		DDYOBOBXPBUGTA-ZZXKWVIFSA-N	Lipids and lipid-like molecules	Prenol lipids	Terpene lactones	*	37.5	0	M+H	C27H29NO13	1.05542	3.27385	0.0286344	0.283204	1.39983	2.6387	98792.6	37439.9	63415	26346	89185.3	81240.5	166835	165734	19295.9	25002.3	25479.1	47019.3	50065.5	57777.3
3.68_298.0970m/z	298.097	3.68173	pos	5'-Methylthioadenosine	HMDB0001173	3425		C00170	439176	2457-80-9	WUUGFSXJNOTRMR-IOSLPCCCSA-N	Nucleosides, nucleotides, and analogues	5'-deoxyribonucleosides	5'-deoxy-5'-thionucleosides	***	76.9	96.6	M+H	C11H15N5O3S	0.596368	3.20059	0.0162439	0.220084	1.18117	2.2676	97698.3	43084.4	94751.3	64787.2	96936.5	143203	36952.1	149559	25058.2	48384.6	56669.3	29045.1	35785.2	63564.1
0.75_457.1683m/z	457.168	0.746283	pos	(S)-4-(4-((2-(3,5-Dimethylphenyl)pyrrolidin-1-yl)Methyl)phenoxy)-3-fluorobenzaMide	HMDB0244422				44256416		ZHPMYDSXGRRERG-UHFFFAOYSA-N	Benzenoids	Benzene and substituted derivatives	Diphenylethers	*	38.3	5.39	M+K	C26H27FN2O2	-1.29865	3.09959	0.0255444	0.27025	-0.498566	0.70781	148980	210480	107697	194401	124619	122600	166065	178496	164293	213699	158193	214525	231172	280997
0.68_399.1443m/z	399.144	0.681467	pos	S-Adenosylmethionine		3289		C00019	34755	29908-03-0	MEFKEPWMEQBLKI-AIRLBKTGSA-N	Unclassified	Unclassified	Unclassified	*	50.2	63.3	M+H	C15H22N6O5S	-0.533548	3.06258	0.00846273	0.164954	1.50634	2.84088	70111.5	24679.5	66540	90107.1	67973.8	60668.6	19156.7	116223	17385.5	29613.1	32985.7	15594	13288	39210.8
0.75_261.1808m/z	261.181	0.746283	pos	Tiglylcarnitine	HMDB0002366				91825636	64681-36-3	WURBQCVBQNMUQT-OLKPEBQYSA-N	Lipids and lipid-like molecules	Fatty Acyls	Fatty acid esters	**	48	12.9	M+NH4	C12H21NO4	-0.189377	3.05054	0.00497438	0.135604	2.10881	4.31334	57127.8	13244.4	74762.2	46735.6	36548.6	102953	60674.2	21093	4589.48	16833	14416.1	13691	6378.58	23558.4
12.58_743.5611m/z	743.561	12.5801	pos	DG(22:3(10Z,13Z,16Z)/22:5(7Z,10Z,13Z,16Z,19Z)/0:0)[iso2]		4671	LMGL02010296		9543961		ADAYNMPDDSBBML-NVNFPEBVSA-N	Lipids and lipid-like molecules	Glycerolipids	Diradylglycerols	*	37.3	20.5	M+Na	C47H76O5	3.63051	3.0353	0.0434629	0.338345	-1.47642	0.35938	31201.3	86819.6	23553.8	66017.1	41296.8	19430.9	18487.1	18422	121517	160457	73299.4	116731	18787.1	30127
11.71_824.5451m/z	824.545	11.7136	pos	PE(22:2(13Z,16Z)/5-iso PGF2VI)	HMDB0283966						DRRWVFSHTSWGQW-BCMUEGABSA-N	Unclassified	Unclassified	Unclassified	*	36.5	0	M+H-H2O	C45H80NO11P	1.72386	3.02373	0.00724536	0.158216	1.3876	2.61642	73089.7	27935	111543	45272.5	29357.6	69965.5	102908	79492	41783.8	31953.5	26810.4	25076.4	20558	21427.7
0.71_413.1109m/z	413.111	0.709183	neg	chlorogenic acid methyl ester; Methyl chlorogenate		985117			6476139		MZNIJRAPCCELQX-AWOKGZDASA-N	Unclassified	Unclassified	Unclassified	*	37.4	0	M+FA-H	C17H20O9	5.3567	3.02149	0.0372967	0.317287	-0.963502	0.512811	56919.8	110996	52647.7	67436.8	74310.8	31688.8	63402.3	52032.4	164838	180364	109275	98986.6	67246.5	45264.9
1.05_364.1363m/z	364.136	1.04575	pos	Mycotoxin T 2	HMDB0032864	88782			131751337	208346-80-9	UNNZZQOFLFJJJZ-UHFFFAOYSA-N	Organic oxygen compounds	Organooxygen compounds	Carbohydrates and carbohydrate conjugates	*	37.7	0	M+Na	C16H23NO7	-1.18488	2.88399	0.00145181	0.0799429	-0.698536	0.616197	57604.2	93483.5	59356.9	64319	51319.6	52069.2	59106.7	59454	125610	66304.6	99432.9	82971.4	91946.3	94636
0.73_742.0686m/z	742.069	0.725633	neg	NADP	HMDB0000217			C00006	5885	53-59-8	XJLXINKUBYWONI-NNYOXOHSSA-N	Benzenoids	Phenols	Benzenediols	**	56.3	0	M-H	C21H28N7O17P3	0.59114	2.8464	0.0017923	0.0887971	0.603258	1.51914	101846	67041.6	74296.5	87654.5	110349	102225	118193	118357	70700.7	76589.8	54670.6	64487.3	57666.9	78134.5
5.69_558.2471m/z	558.247	5.68688	pos	ibho#22			LMFA13040144		86289900		FUIIPNLIVZGYJM-RHENGWIESA-N	Lipids and lipid-like molecules	Fatty Acyls	Fatty acyl glycosides	*	46.4	37.2	M+K	C28H41NO8	1.46455	2.84103	0.046912	0.350832	0.862114	1.8177	117665	64733.1	68058.8	89636.3	85966.6	213842	92443.4	156045	65592.5	79363.5	43779.5	64952.2	74284.9	60426.1
3.92_372.2387m/z	372.239	3.92275	pos	10-Hydroxydodecanedioylcarnitine	HMDB0241287						JKFXDDFOIMQMJJ-UHFFFAOYSA-N	Lipids and lipid-like molecules	Fatty Acyls	Fatty acid esters	*	43	19.1	M+H-H2O	C19H35NO7	1.68824	2.81694	0.0464089	0.348748	-0.809215	0.570692	54455.7	95420.4	1468.92	66490.4	56347.8	78876.2	51790	71760.8	84116.9	45538.8	130283	111854	129886	70843.1
0.86_404.1194n	427.109	0.85875	pos	1,2-Diphenyl-4-(2''-phenylsulfinethyl)-3,5-pyrazolidinedione	HMDB0248909				53662785		AUMHDRMJJNZTPB-UHFFFAOYSA-N	Organoheterocyclic compounds	Azoles	Pyrazoles	*	37.3	0.926	M+Na, M+K	C23H20N2O3S	-0.0880295	2.77465	0.0459659	0.348025	0.244223	1.18445	339277	286442	336394	293848	317833	322440	394867	370282	252524	223008	287146	335477	327031	293465
4.86_368.1450n	369.152	4.86035	pos	4-Hydroxy-3-prenylbenzoic acid glucoside	HMDB0039891	94435					ZTHSABILDCCHJR-UHFFFAOYSA-N	Organic oxygen compounds	Organooxygen compounds	Carbohydrates and carbohydrate conjugates	**	57.6	0	M+H, M+Na	C18H24O8	-5.87958	2.75213	0.00699391	0.156506	8.12224	278.637	37396.4	134.212	6810.8	38133.7	10036.5	32445	69776.4	67176.2	80.0228	56.0283	43.6638	364.478	160.64	100.44
0.73_353.0896m/z	353.09	0.725633	neg	2-Ethoxy-6(5-tetrazolyl)xanthone	HMDB0247563				146000		MPTIYRLFOQQXKE-UHFFFAOYSA-N	Organoheterocyclic compounds	Benzopyrans	1-benzopyrans	*	37.6	0	M+FA-H	C16H12N4O3	1.4291	2.6423	0.000320526	0.0461695	-0.847974	0.555564	36511.8	65720.1	44746.5	33267.8	33592.5	29211.8	43926.8	34325.4	62551.9	66740.9	79227.1	75260.9	45546.7	64993.3
13.95_212.9793m/z	212.979	13.9474	neg	Heptafluorobutyric acid	HMDB0253102	336951			9777		YPJUNDFVDDCYIH-UHFFFAOYSA-N	Organohalogen compounds	Alkyl halides	Alkyl fluorides	*	47.2	38.5	M-H	C4HF7O2	0.395911	2.57537	0.00339072	0.116457	0.180337	1.13315	259391	228912	263794	249938	252336	285343	265068	239868	228373	219721	246611	216827	223386	238555
1.05_286.0968m/z	286.097	1.04575	pos	Flumazenil	HMDB0015336	2724		C07825	3373	78755-81-4	OFBIFZUFASYYRE-UHFFFAOYSA-N	Organoheterocyclic compounds	Benzodiazepines	1,4-benzodiazepines	*	36.8	0	M+H-H2O	C15H14FN3O3	-6.05163	2.45559	0.0472673	0.351268	-0.467817	0.723058	91534.5	126594	104154	130068	83606.8	59835.4	86742.5	84800.2	161290	149862	115594	138837	115185	78791.7
13.17_332.2716n	331.264	13.165	neg	Adrenic acid	HMDB0002226	6560	LMFA01030178	C16527	5497181	28874-58-0	TWSWSIQAPQLDBP-DOFZRALJSA-N	Lipids and lipid-like molecules	Fatty Acyls	Fatty acids and conjugates	*	48.2	44.6	M-H, M+FA-H	C22H36O2	0.25067	2.43863	0.0262768	0.272762	-1.02859	0.490189	29525.7	60233.2	29253.8	35544.7	36727.6	10277.3	26875.1	38475.6	59077.9	57891	67536.7	106613	26388.6	43892.5
0.84_261.0582m/z	261.058	0.84175	pos	3-deoxy-D-manno-octulosonate	HMDB0304125	63650		C01187	119228		KYQCXUMVJGMDNG-SHUUEZRQSA-N	Organic oxygen compounds	Organooxygen compounds	Carbohydrates and carbohydrate conjugates	**	58.8	28.6	M+Na	C8H14O8	0.590816	2.36491	0.0152595	0.213862	0.99745	1.99647	58565.1	29334.4	52535.6	43894.9	41855.7	101576	60974.6	50553.9	20212	20695	32270.5	25641.8	28572.5	48614.3
0.71_307.0436m/z	307.044	0.709183	neg	Mannitol 1-phosphate	HMDB0001530	3393		C00644	130418	15806-48-1	GACTWZZMVMUKNG-KVTDHHQDSA-N	Organic oxygen compounds	Organooxygen compounds	Carbohydrates and carbohydrate conjugates	*	42.3	14.2	M+FA-H	C6H15O9P	0.00620112	2.34079	0.0402866	0.328306	-0.568515	0.67431	69118	102502	43694.6	63820.8	66545.5	56779.4	92212.8	91654.6	116491	152452	90305.2	94983.9	92205.8	68571.8
13.92_168.9894m/z	168.989	13.9206	neg	1,1,1,2,3,3,3-Heptafluoropropane	HMDB0244037				67940		YFMFNYKEUDLDTL-UHFFFAOYSA-N	Organohalogen compounds	Organofluorides	Unclassified	*	40.8	4.65	M-H	C3HF7	-0.0216234	2.33013	0.00365404	0.121264	0.163752	1.1202	235506	210236	243023	228016	227570	256974	237049	220404	212191	202573	225589	198737	206273	216055
0.76_127.0389m/z	127.039	0.761983	pos	1,2,3-Trihydroxybenzene	HMDB0013674	65561		C01108	1057	87-66-1	WQGWDDDVZFFDIG-UHFFFAOYSA-N	Benzenoids	Phenols	Benzenetriols and derivatives	*	44.7	30.5	M+H	C6H6O3	-0.46242	2.3261	0.00104322	0.0689622	-0.395532	0.760209	73277.3	96391	77988.6	74118.8	78966.5	72412.2	71063.6	65114.2	115203	97982.2	101335	85985.6	93541.2	84299.6
10.67_805.5782m/z	805.578	10.6725	neg	3,5-Dihydroxytetradecanoylcarnitine	HMDB0241354						CAOJKTXWUKAVIY-UHFFFAOYSA-N	Lipids and lipid-like molecules	Fatty Acyls	Fatty acid esters	*	37.3	0	2M-H	C21H41NO6	-1.66273	2.30052	0.0284023	0.28263	0.635256	1.55321	89570.1	57667.6	81860.6	120631	120697	94032.5	53706.9	66493.4	70541.6	48139.5	66027.8	70814.9	41971.3	48510.4
0.76_155.0099m/z	155.01	0.757467	neg	Orotic acid	HMDB0000226	318		C00295	967	65-86-1	PXQPEWDEAKTCGB-UHFFFAOYSA-N	Organoheterocyclic compounds	Diazines	Pyrimidines and pyrimidine derivatives	***	72.6	89.8	M-H	C5H4N2O4	0.33668	2.27234	0.0122201	0.193514	-2.01299	0.247758	7494.82	30250.5	4847.46	2732.62	11330.6	11037.4	9753.9	5266.86	28918.5	9257.14	23366.9	50449.1	52960.3	16551.2
14.33_445.3675m/z	445.368	14.333	pos	1alpha,25-dihydroxy-24a,24b-dihomovitamin D3 / 1alpha,25-dihydroxy-24a,24b-dihomocholecalciferol			LMST03020421		9547528		NXSMZYQLQNEMOK-JSGLYZFWSA-N	Lipids and lipid-like molecules	Steroids and steroid derivatives	Secosteroids	*	49.1	73.6	M+H	C29H48O3	-0.252333	2.26399	0.0476182	0.352256	-1.00286	0.499011	29047.3	58209.8	10655.7	53093.9	54556	39640.8	6985.92	9351.46	68860.3	76291.2	77972.6	61740.7	43557.8	20836
0.71_104.0110n	207.015	0.709183	neg	Hydroxypyruvic acid	HMDB0001352	482		C00168	964	1113-60-6	HHDDCCUIIUWNGJ-UHFFFAOYSA-N	Organic acids and derivatives	Hydroxy acids and derivatives	Beta hydroxy acids and derivatives	**	45.6	0	M-H, 2M-H	C3H4O4	0.231274	2.23929	0.0160927	0.219327	0.770428	1.70578	66014.7	38700.7	65802.8	75679.7	43245.9	101484	47327.9	62548.1	26251.2	37037.3	47212.5	30497.3	50840.6	40365.1
4.34_312.1212n	357.119	4.34253	neg	Moringyne	HMDB0031724	87896			131751186	97400-73-2	QQHRYSLWMCEKRX-UHFFFAOYSA-N	Organic oxygen compounds	Organooxygen compounds	Carbohydrates and carbohydrate conjugates	*	48.5	46.5	M-H, M+FA-H	C15H20O7	0.938924	2.23437	0.0183454	0.230901	4.99058	31.7918	28682.3	902.19	5397.29	17541.1	7778.15	32640	38811.9	69925.3	544.369	578.695	499.237	1571.78	1272.84	946.222
0.70_133.0375n	134.045	0.699383	pos	D-Aspartic acid	HMDB0006483	63097		C00402	83887	1783-96-6	CKLJMWTZIZZHCS-UWTATZPHSA-N	Organic acids and derivatives	Carboxylic acids and derivatives	Amino acids, peptides, and analogues	***	65.9	42.4	M+H-H2O, M+H	C4H7NO4	-0.361465	2.20118	0.0305657	0.292076	-0.466325	0.723806	71716.6	99082.7	80426.7	72429.5	71647.4	52573.4	74040.1	79182.6	137477	111702	105350	93318.6	71008.7	75640.5
13.20_383.3397n	406.329	13.1976	pos	N-Stearoyl Valine	HMDB0241952				14809077		SIPMISGYHBUSIB-UHFFFAOYSA-N	Organic acids and derivatives	Carboxylic acids and derivatives	Amino acids, peptides, and analogues	*	55.7	82.3	M+H, M+Na	C23H45NO3	-0.593864	2.1915	0.00071353	0.0598523	-0.537945	0.688751	41513.3	60273.2	34909.9	34164.6	45118.4	43724.7	44408.9	46753.1	66804.9	54913.3	65320	69296.1	54965.9	50339
12.26_373.2111m/z	373.211	12.2604	pos	2-((5-(Diethylamino)-[1,2,4]triazolo[1,5-a]pyrimidin-7-yl)(hexyl)amino)ethanol	HMDB0244283				127644		NWCVGIMEZSWINX-UHFFFAOYSA-N	Organoheterocyclic compounds	Triazolopyrimidines	Unclassified	*	39	0	M+K	C17H30N6O	-0.600241	2.1627	0.0108417	0.183694	-0.964341	0.512512	24737.6	48267.3	33697	33372.2	38440.2	2292.66	18139	22484.4	55370.4	53542.9	60440.5	55608.5	29125.1	35516.4
0.73_370.1058n	371.113	0.731017	pos	Paulownin		416910			3084131		CAQZFLPWHBKTTR-WNISUXOKSA-N	Unclassified	Unclassified	Unclassified	*	38.1	0	M+H, M+Na	C20H18O7	1.42539	2.13539	0.0322368	0.299411	0.15708	1.11503	288528	258763	262970	287450	302807	287426	301293	289219	294368	251798	272546	240555	270617	222693
7.18_312.1577n	311.15	7.17835	neg	Propamidine	HMDB0256810	321777			64949		WTFXJFJYEJZMFO-UHFFFAOYSA-N	Benzenoids	Phenol ethers	Unclassified	*	38.5	0.728	M-H, M+FA-H	C17H20N4O2	-3.12308	2.12803	0.00920003	0.170519	8.56661	379.145	22194.3	58.5377	26221.7	53423.9	20983.7	9116.02	7509.49	15910.9	42.9535	93.1211	29.4111	50.7938	134.947	4.23678e-05
4.72_479.1151m/z	479.115	4.72455	neg	Sivelestat	HMDB0258320	320535			107706		BTGNGJJLZOIYID-UHFFFAOYSA-N	Benzenoids	Benzene and substituted derivatives	Benzoic acids and derivatives	*	37	0.00394	M+FA-H	C20H22N2O7S	4.96573	2.1189	0.0286318	0.283204	9.27454	619.318	25926.5	41.8629	2420.2	20981.1	2761.64	18047.2	47482.5	63866.3	4.23678e-05	0.012345	45.7871	90.4354	61.2562	53.6865
4.71_389.1185m/z	389.118	4.71275	pos	Salicyluric beta-D-glucuronide	HMDB0240252				121596205		OEPADIDIUZTYOX-QKZHPOIUSA-N	Organic oxygen compounds	Organooxygen compounds	Carbohydrates and carbohydrate conjugates	*	41.5	12.3	M+NH4	C15H17NO10	-1.65862	2.07989	0.00831887	0.16437	9.10179	549.428	21766.5	39.6166	4677.19	20070.2	5428.38	18868.4	37245.3	44309.5	26.3784	4.23678e-05	4.23678e-05	143.507	4.23678e-05	67.8138
11.45_324.2894m/z	324.289	11.4486	pos	(9E,12E)-N-(2-Hydroxyethyl)octadeca-9,12-dienamide	HMDB0247196				2183		KQXDGUVSAAQARU-UHFFFAOYSA-N	Organic acids and derivatives	Carboximidic acids and derivatives	Carboximidic acids	***	48.6	38.5	M+H	C20H37NO2	-0.824609	2.07362	0.038172	0.319492	-1.00747	0.497418	23606.7	47458.6	14637.2	38798.3	31394.7	10316.9	23533.6	22959.8	71393.7	66182.3	28054.1	59825.8	43060.6	16234.9
11.42_572.2998m/z	572.3	11.4224	neg	PS(22:4(7Z,10Z,13Z,16Z)/0:0)		78841	LMGP03050014		52926282		JTHCCKGEGXLBGO-BIVCQWAISA-N	Lipids and lipid-like molecules	Glycerophospholipids	Glycerophosphoserines	**	51	0	M-H	C28H48NO9P	0.649854	2.06198	0.039333	0.323751	-1.09059	0.469569	21809.4	46445.6	27207.7	36813.5	32298.5	841.126	13209.1	20486.5	42345.6	76163.4	47129.5	65351.4	30344.4	17339.2
4.27_343.1401m/z	343.14	4.26695	neg	3,7,8,15-Scirpenetetrol	HMDB0037560	92417			14587765	128534-67-8	QNKGXSIDHDDDHD-UHFFFAOYSA-N	Lipids and lipid-like molecules	Prenol lipids	Sesquiterpenoids	*	52.1	64.4	M+FA-H	C15H22O6	0.892101	2.03214	0.0233541	0.258401	7.48013	178.543	23014.6	128.902	3055.08	20069.2	2588.59	15264.3	50720.9	46389.5	91.6216	70.1188	61.7622	250.214	101.829	197.867
0.69_259.0224m/z	259.022	0.69395	neg	Galactose 1-phosphate	HMDB0000645	455416		C00446	123912		HXXFSFRBOHSIMQ-FPRJBGLDSA-N	Organic oxygen compounds	Organooxygen compounds	Carbohydrates and carbohydrate conjugates	***	66.9	42.7	M-H	C6H13O9P	0.00550453	1.9981	0.03511	0.311565	0.333356	1.25994	120949	95996.1	118143	93313.8	100539	159648	118909	135144	107357	87531.3	97323.5	92424.8	91089.3	100251
4.85_479.1151m/z	479.115	4.8452	neg	Verproside	HMDB0259794				495172		DBUOUVZMYWYRRI-UHFFFAOYSA-N	Organic oxygen compounds	Organooxygen compounds	Carbohydrates and carbohydrate conjugates	**	40.2	0	M-H2O-H	C22H26O13	-8.76319	1.99345	0.00395061	0.124242	28.7136	4.40203e+08	18650.5	4.23678e-05	5733.3	22988.4	6005.66	12883.8	29968.4	34323.1	4.23678e-05	4.23678e-05	4.23678e-05	4.23678e-05	4.23678e-05	4.23678e-05
13.95_376.2844m/z	376.284	13.946	pos	PGH2-EA		74984	LMFA03010219		53477457		NBFLONVHOGNRHY-YNRDDPJXSA-N	Lipids and lipid-like molecules	Fatty Acyls	Eicosanoids	*	52	65.7	M+H-H2O	C23H39NO4	-0.582392	1.99168	0.0233824	0.258469	-0.819068	0.566808	25433.4	44871.2	19944.5	34229.6	36644.7	11529.8	22570.9	27680.6	34165	44016.1	54677.5	67669.5	44205.8	24493.2
5.11_411.1276m/z	411.128	5.10693	neg	Methylpicraquassioside A	HMDB0038347	93067					YCIAHAYEVBEGKT-UHFFFAOYSA-N	Organic oxygen compounds	Organooxygen compounds	Carbohydrates and carbohydrate conjugates	**	48.7	0	M-H	C19H24O10	-5.00046	1.96308	0.00522946	0.137564	4.77299	27.341	18916.2	691.863	6162.33	32995.7	6442.27	10311.4	28411.3	29174.1	34.7835	4.23678e-05	36.2121	1344.49	1523.68	1212.01
0.84_175.0017m/z	175.002	0.84175	pos	Allopurinol	HMDB0014581	865		C06816	2094	315-30-0	OFCNXPDARWKPPY-UHFFFAOYSA-N	Organoheterocyclic compounds	Pyrazolopyrimidines	Pyrazolo[3,4-d]pyrimidines	*	39.1	2.73	M+K	C5H4N4O	0.429095	1.95662	0.0337337	0.305462	-0.488355	0.712837	53422.8	74943.9	63600.9	52117.7	51220.5	53174.2	56654.9	43768.8	93661.4	98137	82890.3	66083.3	64784.5	44107.1
1.11_261.0583m/z	261.058	1.1094	pos	D-Erythroascorbic acid 1'-a-D-xylopyranoside	HMDB0033626	89426			131751465	174339-85-6	CMPVKMSVRPPYHP-UHFFFAOYSA-N	Organic oxygen compounds	Organooxygen compounds	Carbohydrates and carbohydrate conjugates	**	54.8	0	M+H-H2O	C10H14O9	-8.04567	1.9367	0.0155425	0.216271	0.912628	1.88247	41480.2	22034.9	41059	28513.5	30310.5	68455.1	43603.8	36939.1	15449.8	16494.6	22985.8	18640	22238	36401.6
10.16_576.2039m/z	576.204	10.1579	neg	Acrimarine J	HMDB0040386	94898			131752805	147395-90-2	ZWXOIPZATSFFPY-UHFFFAOYSA-N	Organoheterocyclic compounds	Quinolines and derivatives	Benzoquinolines	*	38.3	0	M-H2O-H	C35H33NO8	1.89307	1.90426	0.0255844	0.270385	-0.978367	0.507554	22009.8	43364.5	15569	34449.2	23485.8	8371.26	15896.9	34286.7	32464.1	68515.2	21720.4	56690.5	41980.7	38816.3
0.75_472.1741n	473.181	0.746283	pos	Lupinisoflavone N		47791	LMPK12050284		14728999		VWJDUNSQXRTRSD-UHFFFAOYSA-N	Lipids and lipid-like molecules	Polyketides	Flavonoids	*	36.2	0	M+H, M+Na	C25H28O9	1.7216	1.89926	0.0099507	0.177658	-0.369126	0.774252	65613.8	84744.8	49879.4	68340	62756.3	61510.8	77532.2	73664.3	84797.4	101007	68580.6	91500.9	79164.7	83418.5
3.81_445.1394m/z	445.139	3.80808	pos	Euchrenone a2		52794	LMPK12140310		14134103		HLKHOVQEAJNZDM-UHFFFAOYSA-N	Lipids and lipid-like molecules	Polyketides	Flavonoids	*	38	4.51	M+K	C25H26O5	-4.35435	1.8777	0.00444437	0.130682	0.76751	1.70233	41907.7	24617.9	37549	32823.5	35626.3	62339.9	36316.8	46790.8	21097.3	27943.7	26134.2	20633.6	28550.5	23347.9
1.38_276.0177m/z	276.018	1.38165	neg	2,5-Dioxopyrrolidin-1-yl 2-(acetylthio)acetate	HMDB0247382						FLCQLSRLQIPNLM-UHFFFAOYSA-N	Organoheterocyclic compounds	Pyrrolidines	Pyrrolidones	*	50.5	61.7	M+FA-H	C8H9NO5S	-2.93933	1.85477	0.00202361	0.0926138	-0.546318	0.684766	32833.5	47948.5	34910.4	31543.5	32429.5	33977.3	33042.7	31097.6	60066.7	53491.6	52629.8	44416.5	39320.1	37766.5
4.16_345.1558m/z	345.156	4.16078	neg	(1R,3S,4S,6R)-6,9-Dihydroxyfenchone 6-O-b-D-glucoside	HMDB0033222	89089			85160606	217960-73-1	QZAWDTYMSDWVFW-UHFFFAOYSA-N	Lipids and lipid-like molecules	Prenol lipids	Terpene glycosides	***	60.7	48.6	M-H	C16H26O8	0.909097	1.82244	0.0163328	0.220367	7.9955	255.204	17451.6	68.3832	3824.78	19644.8	4903.37	7114.82	39500.2	29721.8	94.7419	27.7496	48.531	134.056	4.23678e-05	105.221
1.05_172.0969m/z	172.097	1.04575	pos	3-hydroxyhexanoylglycine	HMDB0094720				131802903		AYNJYFWPCLXDNL-UHFFFAOYSA-N	Organic acids and derivatives	Carboxylic acids and derivatives	Amino acids, peptides, and analogues	*	38.5	0	M+H-H2O	C8H15NO4	0.661044	1.80325	0.0350857	0.311565	-1.79335	0.288502	7726.03	26779.8	9863.91	13649.3	6304.24	5460.23	3507.39	7571.1	23718.2	47787.6	51926.2	17910.2	13088.8	6248.09
0.70_149.0638m/z	149.064	0.699383	pos	Hexanesulfonic acid	HMDB0253146				49937		FYAQQULBLMNGAH-UHFFFAOYSA-N	Organic acids and derivatives	Organic sulfonic acids and derivatives	Organosulfonic acids and derivatives	*	37.2	0	M+H-H2O	C6H14O3S	4.29303	1.76706	0.0346396	0.309441	-0.399468	0.758138	51541.7	67984.6	42704.9	49911.2	38459.5	58003.4	63196.2	56975	85721.1	65435.7	50290.7	79846.1	69665.4	56948.7
10.14_836.5435m/z	836.543	10.1447	pos	PG(20:4(8Z,11Z,14Z,17Z)/20:4(5Z,8Z,11Z,14Z))	HMDB0116596				131823242		AODUCYGPJPVTMR-KMXSEVSUSA-N	Lipids and lipid-like molecules	Glycerophospholipids	Glycerophosphoglycerols	*	37.2	0	M+NH4	C46H75O10P	-0.174131	1.76264	0.0136886	0.20555	-0.470146	0.721892	39506.2	54726	38486.8	28286.1	34410.1	46311.3	51441.4	38101.5	51402.1	37055.7	61156.1	58804.1	60039.6	59898
13.95_319.2630m/z	319.263	13.946	pos	10Z-Nonadecenoic acid	HMDB0013622	35026	LMFA01030362		5312513	73033-09-7	BBOWBNGUEWHNQZ-KTKRTIGZSA-N	Lipids and lipid-like molecules	Fatty Acyls	Fatty acids and conjugates	**	55.6	0	M+Na	C19H36O2	7.69189	1.76055	0.0324126	0.299755	-0.608662	0.655805	31356	47813	27848.8	41278.5	40177.5	12409	31335.4	35086.6	45378.4	49537.2	61504.4	61017.5	39385.2	30055.2
0.79_172.0968m/z	172.097	0.794483	pos	Castanospermine	HMDB0249700				2592		JDVVGAQPNNXQDW-UHFFFAOYSA-N	Organoheterocyclic compounds	Indolizidines	Unclassified	*	45.9	36.6	M+H-H2O	C8H15NO4	0.0624199	1.73964	0.0433703	0.338181	-1.79438	0.288295	7810.23	27091.1	11141	10932	7343.87	5724.3	5462.43	6257.79	21042.1	59410.3	44413.8	16856.1	12756.9	8067.11
11.45_348.2895m/z	348.289	11.4486	pos	Anandamide	HMDB0004080	3721	LMFA08040001	C11695	5281969	94421-68-8	LGEQQWMQCRIYKG-DOFZRALJSA-N	Organic nitrogen compounds	Organonitrogen compounds	Amines	***	57.5	89.6	M+H	C22H37NO2	-0.732712	1.70599	0.00587451	0.145196	-1.30955	0.403446	8626.93	21383.1	5498.23	10015.2	9425.58	1701.97	11035.5	14085.1	28192.8	23680.1	17290.4	29119.6	21956.1	8059.61
1.11_136.0525n	119.049	1.1094	pos	Oxonol	HMDB0256000						FPJNARSNQQWPEX-KZPCVFJPSA-N	Unclassified	Unclassified	Unclassified	*	41.6	12.5	M+H-H2O, M+H	C8H8O2	0.210378	1.69506	0.028449	0.282974	-0.266712	0.831212	78514.7	94458.1	74463.6	68800.8	61610.7	84736.3	95637.2	85839.5	92369.9	98683.2	91092.6	87072.6	110118	87412.3
4.09_233.1266n	256.116	4.09482	pos	4-[(2,4-Dihydroxy-3,3-dimethylbutanoyl)amino]butanoic acid	HMDB0246316				2527		SBBDHANTMHIRGW-UHFFFAOYSA-N	Organic acids and derivatives	Carboxylic acids and derivatives	Amino acids, peptides, and analogues	***	59.6	51.5	M+Na, M+K, M+H	C10H19NO5	1.35107	1.695	0.00372003	0.121433	0.470434	1.38553	45694.6	32980	31955.8	47433.3	49524.1	49422.1	51650.2	44182.3	34730.4	32447.3	32596.8	30488.1	27733.5	39883.8
0.75_275.1712m/z	275.171	0.746283	pos	Glutaminyllysine	HMDB0028802				71363012	45234-03-5	CLSDNFWKGFJIBZ-YUMQZZPRSA-N	Organic acids and derivatives	Carboxylic acids and derivatives	Amino acids, peptides, and analogues	**	50.5	0	M+H	C11H22N4O4	-0.674497	1.68074	0.00493175	0.135204	2.3355	5.04726	16609.2	3290.74	19151.6	16034.2	13876.8	31908.6	13150.3	5533.86	1645.11	7627.89	3841.62	943.996	1775.1	3910.72
5.02_413.1434m/z	413.143	5.02187	neg	Methyl (R)-9-hydroxy-10-undecene-5,7-diynoate glucoside	HMDB0040895	95348			131752976	152141-44-1	XCRGUWJZEOHKGC-UHFFFAOYSA-N	Lipids and lipid-like molecules	Fatty Acyls	Fatty acyl glycosides	**	43	0	M+FA-H	C18H24O8	-5.09269	1.66064	0.00770552	0.160295	6.84983	115.346	13641.1	118.262	1830.94	21019.9	2762.26	10738.7	24992.6	20502.1	4.23678e-05	4.0195	5.51147	351.303	279.56	69.1761
12.57_429.1738m/z	429.174	12.5723	neg	Tarazepide	HMDB0258726				65993		CZPILLBHPRAPCB-UHFFFAOYSA-N	Organic acids and derivatives	Carboxylic acids and derivatives	Amino acids, peptides, and analogues	*	38.4	0	M-H2O-H	C28H24N4O2	3.90819	1.65817	0.0478822	0.353311	-1.09639	0.467686	14481.6	30964.3	19106.4	29320.8	19054.4	318.387	6175.22	12914.2	43314.7	36718	46387.2	32923.8	10651.2	15790.9
12.42_401.1637m/z	401.164	12.4241	neg	Bay-41-8543	HMDB0248896	461606			9953906	256498-66-5	AQYFUZRYBJBAGZ-UHFFFAOYSA-N	Organoheterocyclic compounds	Pyrazolopyridines	Unclassified	*	39	4.16	M-H2O-H	C21H21FN8O	-1.7266	1.63296	0.022266	0.251505	-1.4933	0.3552	7523.13	21180	10218	10343.2	12091.8	371.59	3426.29	8687.85	36875.1	25900.4	23506.6	25433.4	9254.75	6109.61
4.71_169.1224m/z	169.122	4.71275	pos	(1S,4R)-1-Hydroxy-2-oxolimonene		330420	LMPR0102090042	C11937	443522		JEQLRDRDFLXSHY-SCZZXKLOSA-N	Lipids and lipid-like molecules	Prenol lipids	Isoprenoids	*	46.2	34.4	M+H	C10H16O2	0.748682	1.63259	0.0125752	0.196677	2.84534	7.18673	16118.9	2242.87	4822.19	13641.6	4932.08	14146.5	28757.9	30413.3	2063.66	1996.72	2488.81	2312.44	1994.26	2601.36
4.68_583.3247m/z	583.325	4.68068	pos	POV-PG			LMGP20060015		134812468		QLZLSMOBIJWBNU-LOSJGSFVSA-N	Lipids and lipid-like molecules	Glycerophospholipids	Oxidized glycerophospholipids	*	39.1	0	M+H	C27H51O11P	0.894218	1.63136	0.0418199	0.332517	-0.558353	0.679077	28658.6	42202.2	31391.8	27538.3	34433	35518.3	24060.5	19009.5	34983.7	30886.8	61616.3	49171.1	47525.5	29029.9
10.40_324.2302n	347.219	10.3954	pos	TOFA		34518			115175	54857-86-2	CZRCFAOMWRAFIC-UHFFFAOYSA-N	Unclassified	Unclassified	Unclassified	*	38.7	0	M+H, M+Na, M+H-H2O	C19H32O4	0.555865	1.62424	0.00335059	0.116131	1.35967	2.56627	21547	8396.23	22172.6	10314.1	20188.3	34760	24494.2	17352.7	7462.8	7843.58	9880.08	11455.3	8878.38	4857.27
4.72_547.1027m/z	547.103	4.72455	neg	Ginkgetin	HMDB0033762	43573	LMPK12040003	C10048	5271805	481-46-9	AIFCFBUSLAEIBR-UHFFFAOYSA-N	Phenylpropanoids and polyketides	Flavonoids	Biflavonoids and polyflavonoids	*	36.7	0	M-H2O-H	C32H22O10	-1.24816	1.62417	0.0312341	0.294961	10.2158	1189.23	15436.3	12.98	1099.44	12650	1432.12	10803.6	27488.5	39144.1	4.23678e-05	4.23678e-05	4.23678e-05	77.8799	4.23678e-05	4.23678e-05
11.43_362.2684m/z	362.268	11.4303	pos	N-Arachidonoylglycine	HMDB0005096	36676	LMFA08020003		5283389	179113-91-8	YLEARPUNMCCKMP-DOFZRALJSA-N	Organic acids and derivatives	Carboxylic acids and derivatives	Amino acids, peptides, and analogues	***	64.9	87	M+H	C22H35NO3	-1.52669	1.58372	0.00288039	0.110731	-0.866887	0.548329	13489.9	24601.8	10842.7	11985.3	14562.4	4018.05	19415.2	20115.8	25590.3	23126.5	28580.9	23450.7	27860.4	19002.3
4.11_637.3146m/z	637.315	4.1141	pos	1,2-(8R,9R-epoxy-octadec-13Z,15Z-dien-4,6-diynoyl)-sn-glycerol			LMGL03016886		137323896		RPASRKKBGSSVMK-SUERBGQKSA-N	Lipids and lipid-like molecules	Glycerolipids	Triradylglycerols	*	36.2	3.49	M+Na	C38H46O7	1.64113	1.57977	0.00983378	0.176516	0.523163	1.4371	35430.9	24654.4	33909.5	36748.7	40314.6	27674.6	39137.2	34800.8	27259.9	30611.1	18262.7	14830.4	24382.7	32579.6
0.73_102.0913m/z	102.091	0.731017	pos	N-Ethylpropionamide	HMDB0302430	340840			521324		ABMDIECEEGFXNC-UHFFFAOYSA-N	Organic acids and derivatives	Carboxylic acids and derivatives	Carboxylic acid derivatives	*	41.8	15.1	M+H	C5H11NO	-0.607513	1.57656	0.0299486	0.288662	-1.38468	0.382974	8297.99	21667.3	11086.5	6910.07	5001.93	8599.66	6857.3	11332.5	40695.8	27200.5	28374.6	14835.4	12899.7	5997.55
4.11_964.4413m/z	964.441	4.11317	neg	PGP(LTE4/16:1(9Z))	HMDB0272431						GMIVCVSINYSIOL-QYHYMJFTSA-N	Unclassified	Unclassified	Unclassified	*	37	0	M-H2O-H	C45H79NO16P2S	-0.384403	1.56155	0.00933085	0.171851	0.782551	1.72017	25070.5	14574.4	23990	30486.4	31124.7	16009.8	27038.8	21773.4	11911.5	19753.5	9574.77	10222.2	12723.4	23261.2
0.75_413.1618m/z	413.162	0.746283	pos	Serylvalylglycylglutamic acid	HMDB0302163				18744842		BUADZOJMDKUNMV-UHFFFAOYSA-N	Organic acids and derivatives	Carboxylic acids and derivatives	Amino acids, peptides, and analogues	*	36.8	0	M+Na	C15H26N4O8	-6.45726	1.52907	0.0237809	0.260877	-0.570744	0.673269	25926	38507.6	9662.39	32449.7	23874.4	32587.9	25908.7	31072.6	26478.9	35049.9	39923.9	39995.9	49674.4	39922.5
2.12_249.0864n	294.085	2.11522	neg	2',3'-Didehydro-2',3'-dideoxyguanosine	HMDB0245542				360780		FZYYPNOHKXTKLI-UHFFFAOYSA-N	Organoheterocyclic compounds	Imidazopyrimidines	Purines and purine derivatives	*	39.9	2.41	M-H, M+FA-H	C10H11N5O3	0.852186	1.5281	0.0227919	0.254596	0.431047	1.34821	49534.3	36740.8	39956.2	46907.5	47081.6	47698.1	51582.2	63980.4	32719.2	29214.8	26483.9	41551.8	42657.8	47817.1
0.79_522.0877m/z	522.088	0.794433	neg	ARN-509	HMDB0248608				24872560		HJBWBFZLDZWPHF-UHFFFAOYSA-N	Organoheterocyclic compounds	Azolidines	Imidazolidines	*	36.3	0	M+FA-H	C21H15F4N5O2S	2.55896	1.51528	0.0226451	0.25391	-0.951263	0.517179	13698.9	26487.6	21154	26149.5	19430.9	2270.46	9575.23	3613.08	38123	22687.7	27006	26176.6	21455.5	23477
6.21_505.1721m/z	505.172	6.21312	neg	Eruberin A			LMPK12020167		44257136		BVWNFYIRLQDZHV-AGPJMPNYSA-N	Lipids and lipid-like molecules	Polyketides	Flavonoids	*	43.7	22.7	M+FA-H	C24H28O9	1.13591	1.50672	0.000563163	0.0564204	27.7692	2.28757e+08	9691.92	4.23678e-05	6312.01	7340.3	3966.54	10144.5	16550.8	13837.4	4.23678e-05	4.23678e-05	4.23678e-05	4.23678e-05	4.23678e-05	4.23678e-05
10.35_605.3214m/z	605.321	10.3547	neg	Tribenzylamine n-oxide		24081			3624962	6852-46-6	KIAARAUZZLGXFK-UHFFFAOYSA-N	Unclassified	Unclassified	Unclassified	*	37.7	0	2M-H	C21H21NO	6.70787	1.50436	0.0199461	0.238544	-0.784964	0.580366	15372.2	26487.1	13444	24555.4	19258.5	4767.99	13899.5	16307.8	34084.1	23260.4	31825.4	27817.1	28271.4	13664
8.24_349.1119m/z	349.112	8.24325	neg	Estrone sulfate	HMDB0001425	3556	LMST02010043	C02538	3001028	481-97-0	JKKFKPJIXZFSSB-CBZIJGRNSA-N	Lipids and lipid-like molecules	Steroids and steroid derivatives	Sulfated steroids	*	53.1	73	M-H	C18H22O5S	0.979505	1.50219	0.0495971	0.357685	28.3786	3.48984e+08	14785.7	4.23678e-05	1023.39	1160.63	449.485	26085	21502.2	38493.4	4.23678e-05	4.23678e-05	4.23678e-05	4.23678e-05	4.23678e-05	4.23678e-05
11.81_314.2688m/z	314.269	11.808	pos	Palmitoylglycine	HMDB0013034	45157	LMFA08020079		151008	158305-64-7	KVTFEOAKFFQCCX-UHFFFAOYSA-N	Organic acids and derivatives	Carboxylic acids and derivatives	Amino acids, peptides, and analogues	*	51.1	59.9	M+H	C18H35NO3	-0.679841	1.49647	0.0096758	0.175087	-0.588518	0.665026	22485	33810.7	17304.7	35507	23522.9	16937.7	18344.5	23293	32082	39556.4	40097.5	33817.9	30021	27289.3
12.94_588.4403m/z	588.44	12.9358	pos	1-(2-methoxy-5Z,19Z-hexacosadienyl)-sn-glycero-3-phosphoethanolamine			LMGP02060032		137323935		HOWFOHSAKZNNGK-HXPUTSELSA-N	Lipids and lipid-like molecules	Glycerophospholipids	Glycerophosphoethanolamines	*	46.6	41.2	M+H-H2O	C32H64NO7P	2.54578	1.49319	0.0470571	0.350832	-0.71066	0.611041	21036	34426.6	16720.2	38221.3	25920.8	11269.6	20612.3	13472	28969.1	24062.2	39694.3	51381.5	24666.5	37785.8
0.83_281.0361m/z	281.036	0.827467	neg	Tazobactam	HMDB0015544	581		C07771	123630	89786-04-9	LPQZKKCYTLCDGQ-WEDXCCLWSA-N	Organic acids and derivatives	Carboxylic acids and derivatives	Amino acids, peptides, and analogues	*	37.2	0	M-H2O-H	C10H12N4O5S	3.54951	1.47041	0.0272407	0.27746	0.50038	1.41459	40649.4	28735.9	28938.8	35933.1	48368.5	48948.9	42732.8	38974.5	30635.3	22524.1	16605.2	32124.7	29934.5	40591.8
0.69_243.0387m/z	243.039	0.685783	neg	Nitrofurazone	HMDB0014480	43276		C08042	5447130	59-87-0	IAIWVQXQOWNYOU-FPYGCLRLSA-N	Organoheterocyclic compounds	Furans	Nitrofurans	*	36.9	0	M+FA-H	C6H6N4O4	8.10508	1.46445	0.00710076	0.157058	0.803083	1.74483	23250.3	13325.3	22531.7	13316.3	19590.1	25881.6	27336.2	30845.6	13686.6	15638.4	13284	8186.07	10641	18515.5
0.78_136.0617m/z	136.062	0.77895	pos	FAPy-adenine	HMDB0004816	7080		C06502	114926	5122-36-1	MVYUVUOSXNYQLL-UHFFFAOYSA-N	Organoheterocyclic compounds	Diazines	Pyrimidines and pyrimidine derivatives	**	58.6	29.8	M+H-H2O	C5H7N5O	-0.38163	1.46271	0.000552191	0.0560234	0.371509	1.2937	40188.9	31065	36889.8	39259.2	37264.3	39026.2	46098.1	42596.1	29296.6	28536.2	29503.5	35365.8	30027.3	33660.5
4.60_328.2123m/z	328.212	4.59843	pos	3-Methylnonanedioylcarnitine	HMDB0240795						FIIIQFKVGGXMNO-UHFFFAOYSA-N	Lipids and lipid-like molecules	Fatty Acyls	Fatty acid esters	*	51.8	64.7	M+H-H2O	C17H31NO6	1.20954	1.43511	0.00747614	0.158619	2.32728	5.01857	13236.8	2637.56	4746.03	9755.92	13012.3	12804	11308.2	27794.2	3088.02	2652.06	2879.08	2861.16	2908.06	1436.96
12.43_417.1986m/z	417.199	12.4301	pos	AB-MECA	HMDB0242721				1970		LDYMCRRFCMRFKB-UHFFFAOYSA-N	Nucleosides, nucleotides, and analogues	Purine nucleosides	Unclassified	*	38.9	0	M+NH4	C18H21N7O4	-1.75268	1.4332	0.00160267	0.0838527	-0.84771	0.555666	11184.7	20128.4	12428.6	11579	14392.3	3783.36	11424.8	13499.9	23778.6	19972.2	23303.5	21554.6	15651.3	16510.1
4.81_345.1546m/z	345.155	4.80777	pos	Butyl (S)-3-hydroxybutyrate glucoside	HMDB0031694	87870			76463851		YUPCLHHTUNDMAN-UHFFFAOYSA-N	Lipids and lipid-like molecules	Fatty Acyls	Fatty acyl glycosides	**	48.6	0	M+Na	C14H26O8	8.07145	1.43268	0.00393733	0.124159	4.48133	22.3364	10258.6	459.276	3573.31	8210.98	3776.26	10639.1	15899.8	19451.9	487.159	330.94	216.45	588.019	654.218	478.867
1.11_282.0060m/z	282.006	1.1094	pos	Thioxanthine monophosphate	HMDB0060876				57322338		OAOIXPPCQSJBRI-UHFFFAOYSA-N	Organoheterocyclic compounds	Imidazopyrimidines	Purines and purine derivatives	*	38.9	0	M+NH4	C5H5N4O5PS	1.2891	1.41055	0.000171225	0.0376296	-0.516964	0.698841	18480.7	26444.8	19964.8	16371.5	16852.9	18863.7	20853	17978.6	27306.5	27470.2	28380.2	22902.8	29693.4	22915.9
2.15_310.0021m/z	310.002	2.15165	neg	Flurochloridone	HMDB0252372	68841		C11100	91677	61213-25-0	OQZCSNDVOWYALR-UHFFFAOYSA-N	Organoheterocyclic compounds	Pyrrolidines	Phenylpyrrolidines	*	38.2	34.4	M-H	C12H10Cl2F3NO	0.875482	1.40848	0.000628644	0.0585655	-0.266414	0.831384	41567.8	49998.4	41076.4	40581.1	42868.8	44458.7	38870.1	41551.9	54453.4	53584.6	47759	51253.8	44698.2	48241.4
12.26_355.3450n	378.334	12.2604	pos	Arachidoyl Ethanolamide	HMDB0248559	3723	LMFA08040038		3787294	94421-69-9	AUJVQJHODMISJP-UHFFFAOYSA-N	Organic nitrogen compounds	Organonitrogen compounds	Amines	*	48.3	47.5	M+H, M+Na	C22H45NO2	-0.210586	1.40266	0.00484993	0.134137	-0.362969	0.777563	33627.1	43246.8	34405.2	30355.2	32152.8	30823.8	36186.3	37839.1	47173.5	36492.2	39560.6	38139.2	49481.5	48633.4
11.87_401.1426m/z	401.143	11.8681	neg	N-(6,8-Difluoro-2-methyl-4-quinolinyl)-N'-[4-(dimethylamino)phenyl]urea	HMDB0245742				4331799		JTARFZSNUAGHRB-UHFFFAOYSA-N	Organoheterocyclic compounds	Quinolines and derivatives	Haloquinolines	*	38.8	0	M+FA-H	C19H18F2N4O	-1.18356	1.40235	0.0355413	0.312678	-1.37304	0.386077	7283.15	18864.5	9033.93	12707.7	11002.5	393.946	5041.22	5519.62	33202.2	28654.9	18150	18894.5	5796.56	8488.84
10.32_503.2870m/z	503.287	10.3171	neg	glas#22			LMFA13040100		86289880		GPSYFHFACFTZSX-NGGGFPBGSA-N	Lipids and lipid-like molecules	Fatty Acyls	Fatty acyl glycosides	*	46.1	55.2	M-H2O-H	C25H46O11	1.5505	1.39663	0.0285194	0.283125	-0.897723	0.536733	12638.4	23546.9	15249.6	18098	17219.9	1693.79	8328.22	15240.9	27986.6	35255.6	24108.6	22813.6	20941.7	10175.3
12.62_478.8477m/z	478.848	12.6218	neg	3-(3,5-Diiodo-4-hydroxyphenyl)lactate	HMDB0059636			C04367	440310		ZPJHINFPRQWKIH-UHFFFAOYSA-N	Phenylpropanoids and polyketides	Phenylpropanoic acids	Unclassified	*	38.8	0	M+FA-H	C9H8I2O4	-3.95257	1.39448	0.00835749	0.164463	-0.592152	0.663353	18181.8	27409	16162.7	15829.2	18564.9	16649.1	19129.2	22755.9	31477.2	19535.1	22277.2	25475.1	37115.4	28574.2
15.22_764.5742m/z	764.574	15.2186	pos	3-dodecanoyl-NBD Cholesterol		64805			91886110		TXCIESALPKGCNM-QNKNOTAZSA-N	Unclassified	Unclassified	Unclassified	*	37.7	0	M+NH4	C45H70N4O5	7.65626	1.39137	0.0052682	0.137903	0.293025	1.22521	47571.8	38827.6	47575	47574.5	43388.5	49570.2	48824.7	48498	32389.1	38310.9	36193.9	44119.4	34967.7	46984.5
13.17_431.1895m/z	431.19	13.165	neg	Cediranib	HMDB0249749				9933475		XXJWYDDUDKYVKI-UHFFFAOYSA-N	Organic oxygen compounds	Organooxygen compounds	Ethers	*	38.9	0	M-H2O-H	C25H27FN4O3	1.43169	1.38004	0.0217668	0.249719	-1.5573	0.339786	4969.68	14625.9	4673.44	5989.51	6771.82	1330.75	4413.17	6639.37	15943.7	16715	15178.2	28256.7	3379.31	8282.56
1.11_417.0743m/z	417.074	1.1094	pos	Isopongachromene		48501	LMPK12110065		44257584		CKTFYXPCWPPHAT-UHFFFAOYSA-N	Lipids and lipid-like molecules	Polyketides	Flavonoids	*	37.4	0	M+K	C22H18O6	2.07735	1.3787	0.00167805	0.0861484	-0.783443	0.580979	11434.4	19681.3	13410	11541.3	8679.39	11329.5	12540.8	11105.6	19805.1	25455	19309.6	17919.9	23100.5	12497.9
9.76_385.2018m/z	385.202	9.75588	neg	14beta,15beta-epoxy-3beta,5beta-dihydroxy-19-norbufa-20,22-dienolide			LMST01130071				DVMQYYDEAYYJOG-UBUFQIOTSA-N	Lipids and lipid-like molecules	Steroids and steroid derivatives	Sterols	*	46.7	40.4	M-H	C23H30O5	-0.565016	1.37408	0.0220767	0.251175	1.46808	2.76654	15877.5	5739.11	24260.1	22220	25957.8	7815.17	6406.16	8605.78	5353.15	5103.17	5982.74	5445.8	6482.47	6067.33
6.26_331.1663m/z	331.166	6.25955	neg	10-alpha-methoxy-9,10-dihydrolysergol	HMDB0060995						JGQZSBLQHCTAJF-NFXPUDJFSA-N	Phenylpropanoids and polyketides	Linear 1,3-diarylpropanoids	Cinnamylphenols	*	38.2	0	M+FA-H	C17H22N2O2	-0.189412	1.33802	0.0216701	0.249099	10.7467	1718.21	9340.53	5.43619	5033.62	20131.1	5318.81	768.751	19839.6	4951.29	4.23678e-05	32.6169	4.23678e-05	4.23678e-05	4.23678e-05	4.23678e-05
0.78_142.9986m/z	142.999	0.775883	neg	4-Hydroxy-2-oxoglutaric acid	HMDB0002070	6471		C01127	599	1187-99-1	WXSKVKPSMAHCSG-UHFFFAOYSA-N	Organic acids and derivatives	Keto acids and derivatives	Gamma-keto acids and derivatives	***	50.3	34.6	M-H2O-H	C5H6O6	0.0396802	1.30723	0.041451	0.331344	0.715186	1.64169	25021.7	15241.4	24561.4	18724.3	20724.5	41912.5	22927.1	21280.3	9575.08	12939.8	14435.4	13676.2	14545.1	26276.7
1.38_361.1064n	406.105	1.38165	neg	Bezafibrate	HMDB0015465	1329			39042	41859-67-0	IIBYAHWJQTYFKB-UHFFFAOYSA-N	Benzenoids	Benzene and substituted derivatives	Phenoxyacetic acid derivatives	*	37.5	24.5	M-H, M+FA-H	C19H20ClNO4	-4.53211	1.30395	0.0267806	0.274879	-0.256744	0.836975	47848.5	57168.4	49747.3	48043.3	46173.8	51228.1	45035.7	46862.6	67669.9	63788.5	61045.1	55408.1	46261.9	48836.7
14.17_536.5037m/z	536.504	14.1708	pos	Cer(t18:1(6OH)/16:0)			LMSP02010148				CAXCJECPKVAJKC-GBIVXHQOSA-N	Lipids and lipid-like molecules	Sphingolipids	Ceramides	*	51.6	65.2	M+H-H2O	C34H67NO4	0.0385843	1.29424	0.042374	0.334608	-0.603745	0.658043	16066.5	24415.6	10485.3	17344.7	17407.5	20644.5	18734.2	11783	20537.7	16920.2	30873.9	29955.6	33099.6	15106.7
10.84_432.2989n	433.306	10.843	pos	N-arachidonoyl glutamine		75508	LMFA08020126		52922070		XNAYJICFDMIWEO-HUDVFFLJSA-N	Lipids and lipid-like molecules	Fatty Acyls	Fatty amides	*	39.1	0	M+H, M+Na	C25H40N2O4	0.203183	1.29132	0.0367217	0.316636	-1.12896	0.457245	7712.44	16867.2	8204.79	6462.11	10932.2	2304.31	9068.56	9302.69	27619.1	21995.3	22328.6	13024.9	13002.2	3232.94
10.71_233.1548m/z	233.155	10.7139	neg	Irene	HMDB0253579				14489338		GICIECWTEWJCRE-UHFFFAOYSA-N	Benzenoids	Tetralins	Unclassified	*	39.7	0	M+FA-H	C14H20	0.310804	1.2913	0.00712348	0.157411	0.232485	1.17486	58276.3	49602.9	59047.1	66650.9	56777	58918.8	54281.9	53982.2	48265.8	41935.5	54226.4	51471.5	51944.8	49773.3
3.83_782.1349m/z	782.135	3.83462	neg	6-Hydroxy flavin adenine dinucleotide	HMDB0011612				5287546		BJSUUWFQAMLNKU-OKXKTURISA-N	Nucleosides, nucleotides, and analogues	Flavin nucleotides	Unclassified	*	46.9	43.9	M-H2O-H	C27H33N9O16P2	0.903097	1.28714	0.0321157	0.298812	0.213119	1.15919	71105.9	61341	59710.9	68271.2	71688.6	76684.7	75482.7	74797.2	68622.3	55160.7	55451.2	67268.1	53756.6	67786.9
0.84_415.1573m/z	415.157	0.84175	pos	2-[1-[(2S)-2-[[4-[(E)-N'-Hydroxycarbamimidoyl]benzoyl]amino]propanoyl]piperidin-4-yl]oxyacetic acid	HMDB0257278				18538416		IGVCMKIDNIJWLV-UHFFFAOYSA-N	Benzenoids	Benzene and substituted derivatives	Benzoic acids and derivatives	*	36.6	0	M+Na	C18H24N4O6	-3.75122	1.28684	0.000470956	0.0541143	2.06944	4.19725	8971.45	2137.46	7441.71	6643.66	6927.01	9329.69	14107.2	9379.47	305.121	553.12	1494.89	2225.34	3316.99	4929.3
10.43_455.2037m/z	455.204	10.431	pos	Melleolide G	HMDB0038793	93436			14166120	117258-75-0	GGQLLLSSCCXUBL-UHFFFAOYSA-N	Lipids and lipid-like molecules	Prenol lipids	Sesquiterpenoids	*	38.8	0	M+Na	C24H32O7	-0.696324	1.27745	0.0139365	0.207139	27.5747	1.99899e+08	8469.28	4.23678e-05	20552.5	7572.81	12134	5765.37	1428.38	3362.64	4.23678e-05	4.23678e-05	4.23678e-05	4.23678e-05	4.23678e-05	4.23678e-05
0.74_125.0179m/z	125.018	0.741033	neg	Ethyl methylphosphonofluoridate	HMDB0252055				160541		RIYPSXBGLXRZNJ-UHFFFAOYSA-N	Organic acids and derivatives	Organic phosphonic acids and derivatives	Phosphonic acid esters	*	42.3	20	M-H	C3H8FO2P	4.39305	1.27252	0.00530045	0.137903	-0.336663	0.791871	31808.4	40168.7	26274.4	34939.7	31857.9	29000.5	32366.2	36412	34278.8	43990.3	35282.8	42847.5	40380.3	44232.7
0.72_112.9998m/z	113	0.715617	pos	Glycidol	HMDB0252861	68689		C10920	11164	556-52-5	CTKINSOISVBQLD-UHFFFAOYSA-N	Organoheterocyclic compounds	Epoxides	Unclassified	**	53.7	0	M+K	C3H6O2	-2.42391	1.26005	0.0441919	0.341124	0.545102	1.45912	32146.7	22031.5	28537.8	33866.8	39630	32144.3	31645.1	27056.4	39553.2	13637.8	25331.7	20060.7	12633.4	20972.4
4.42_437.1804n	438.188	4.42465	pos	(2S)-2-[[(2S)-2-[[(2S)-2-Amino-3-methylbutanoyl]amino]propanoyl]-phenylmethoxycarbonylamino]butanedioic acid	HMDB0257866						JHJGVTJGJAHEGE-UHFFFAOYSA-N	Organic acids and derivatives	Carboxylic acids and derivatives	Amino acids, peptides, and analogues	*	41.6	13	M+H, M+Na	C20H27N3O8	1.35857	1.24898	0.00213008	0.0941186	-0.433466	0.740481	19787	26721.8	23515.3	19152.5	19935.3	15904.3	20394.3	19820.2	31507.7	29094.5	26471	24739.4	26627.7	21890.4
5.11_479.1152m/z	479.115	5.10693	neg	Dihydrogenistin	HMDB0039935				21941294		HZFUHKPAKUYSOB-UHFFFAOYSA-N	Phenylpropanoids and polyketides	Isoflavonoids	Isoflavonoid O-glycosides	**	52.2	0	M+FA-H	C21H22O10	-9.8957	1.24874	0.00742065	0.158619	4.26227	19.1899	8016.83	417.764	2405.93	14699	2716.13	4054.22	11668.2	12557.5	76.5905	67.1854	51.9421	872.9	974.985	462.982
10.56_344.2350n	327.232	10.5602	pos	17S-HDHA		36436	LMFA04000012		11046191		SWTYBBUBEPPYCX-YTQNUIGOSA-N	Lipids and lipid-like molecules	Fatty Acyls	Docosanoids	*	43.9	25.6	M+H-H2O, M+H	C22H32O3	-0.444113	1.22925	0.0208664	0.244034	0.60485	1.52082	25120.1	16517.5	26611.6	22690.2	22740.5	34510.3	29569.6	14598.4	17996.5	20157.9	19719.8	14904.8	15677.9	10647.8
14.19_368.2795m/z	368.28	14.1884	pos	(2E,4E)-Tetradecadienoylcarnitine	HMDB0241377				87087939		DBJDCEJXEMUHGM-UHFFFAOYSA-N	Lipids and lipid-like molecules	Fatty Acyls	Fatty acid esters	*	39.4	0	M+H	C21H37NO4	-0.0444979	1.22683	0.036758	0.316636	-0.847057	0.555918	9783.82	17599.4	6054.24	14549	13654.8	5563.36	10643.6	8237.78	24528.9	16850.9	16016.6	26887.7	12835.9	8476.43
1.05_240.1090m/z	240.109	1.04575	pos	Dihydrobiopterin	HMDB0000038	5106		C02953	119055	6779-87-9	FEMXZDUTFRTWPE-DZSWIPIPSA-N	Organoheterocyclic compounds	Pteridines and derivatives	Pterins and derivatives	**	56.4	0	M+H	C9H13N5O3	-0.380432	1.22668	0.0459807	0.348025	-0.333873	0.793403	30504.1	38447.1	29043.5	25966	22906.9	40381.4	30451.5	34275.1	41542.4	29552.6	44805.3	36307.7	43580.6	34894
11.87_453.1953m/z	453.195	11.8681	neg	(E)-2'-Geranyl-3',4',7-trihydroxyflavanone	HMDB0040317	94838			131752791	113866-90-3	RCYMAXCAVMNZBM-APSNUPSMSA-N	Phenylpropanoids and polyketides	Flavonoids	Flavans	*	37.6	0	M+FA-H	C25H28O5	8.34907	1.21972	0.0100138	0.17796	-1.56438	0.338124	3891.37	11508.7	3451.48	7372.12	5684.38	1116.14	2502.85	3221.27	14075.7	18539.8	7713.68	16058	5091.28	7573.86
4.60_478.2223m/z	478.222	4.59843	pos	Lipoxin E4		45972	LMFA03040006		9548803		KVXVULITEYDTNN-HGCWDHQMSA-N	Lipids and lipid-like molecules	Fatty Acyls	Eicosanoids	*	49.9	62	M+Na	C23H37NO6S	-2.43019	1.21653	0.00194621	0.0910115	6.88944	118.557	6967.61	58.7701	5394.94	3295.03	2978.39	13740.5	7217.15	9179.58	4.13001	43.1573	41.813	64.3466	58.3337	140.84
14.19_407.2904m/z	407.29	14.1884	pos	N-(17-hydroxy-9,12-octadecadienoyl)-glutamine			LMFA08020215		100937252		JPDHHIDMPUIHBY-YHIZTDPQSA-N	Lipids and lipid-like molecules	Fatty Acyls	Fatty amides	*	45.4	31.5	M+H-H2O	C23H40N2O5	-0.194505	1.21599	0.043247	0.33774	-0.653733	0.635633	13359.9	21018.2	9415.79	16189.1	16610.2	9810	16623.6	11510.5	28717.4	17369.2	18741.4	31180	17849.3	12251.7
6.56_499.1653m/z	499.165	6.55992	pos	Talampicillin	HMDB0258686				5373		SOROUYSPFADXSN-UHFFFAOYSA-N	Organoheterocyclic compounds	Benzodiazepines	Unclassified	*	36.7	0	M+NH4	C24H23N3O6S	1.59207	1.20227	0.0440367	0.340715	0.875404	1.83452	19908.8	10852.3	22464.3	14500.2	12186.7	17628.6	15058.6	37614.6	7654.94	11623.7	14563.2	9585.51	11116	10570.7
1.96_365.1356m/z	365.136	1.9591	neg	Semilepidinoside B	HMDB0033108				131751376		ASPNXCICLVYQCJ-UHFFFAOYSA-N	Organic oxygen compounds	Organooxygen compounds	Carbohydrates and carbohydrate conjugates	***	50.9	53.9	M-H	C17H22N2O7	0.369821	1.19841	0.00845788	0.164954	-0.240743	0.84631	40904.8	48333.1	43377.5	41092.1	40890.6	42052.4	38029.3	39986.9	55544.2	47382.6	50853.8	39438.4	48249.2	48530.6
12.43_361.1670m/z	361.167	12.4301	pos	Finerenone	HMDB0252261				24993045		BTBHLEZXCOBLCY-UHFFFAOYSA-N	Organoheterocyclic compounds	Diazanaphthalenes	Naphthyridines	*	38.8	3.74	M+H-H2O	C21H22N4O3	2.82911	1.17094	0.0109295	0.184262	-0.922021	0.527769	7436.25	14090	8555.18	8498.89	10448.9	2804.1	6763.73	7546.64	15703.8	16667.7	17977.2	17572.5	8284.13	8334.37
4.15_355.1182n	356.125	4.15238	pos	7,8-Dimethoxy-3-methyl-1-(4-nitrophenyl)-5H-2,3-benzodiazepin-4-one	HMDB0249845				10473374		NSYNMKLIUFYQED-UHFFFAOYSA-N	Organoheterocyclic compounds	Benzodiazepines	Unclassified	*	37.8	0	M+H, M+NH4	C18H17N3O5	3.92196	1.16485	0.0190985	0.234615	-0.29587	0.814581	33243.6	40810.7	30284.2	37183.6	31686.5	33673.8	32387.9	34245.8	41174.5	41081.9	39428.4	31820.5	51229.4	40129.5
10.09_362.2455n	385.235	10.0869	pos	19,20-DiHDPA	HMDB0010214	61549	LMFA04000043		16061148		FFXKPSNQCPNORO-MBYQGORISA-N	Lipids and lipid-like molecules	Fatty Acyls	Fatty acids and conjugates	**	54.9	4.92	M+H, M+Na, M+H-H2O	C22H34O4	-0.47209	1.1561	0.00523493	0.137564	0.472907	1.3879	23107.2	16649	18410.9	20043.6	23010.5	23075.2	25282.7	28820.4	19840.5	18710.3	14422.3	13973.5	17822.2	15125.4
14.66_404.3158m/z	404.316	14.664	pos	3-hydroxy-4-methylene-2-(n-eicos-11'-yn-19'-enyl)but-2-enolide			LMPK03000094		155530561		LXFGLBCGRKKMRK-UHFFFAOYSA-N	Lipids and lipid-like molecules	Polyketides	Annonaceae acetogenins	*	41.5	12.7	M+NH4	C25H38O3	-0.424466	1.14585	0.0416562	0.331893	-0.9125	0.531264	8492.25	15985	5072.13	8570.28	7736.63	3677.73	14222.3	11674.5	13896.4	13752	13222.5	29159.1	9678.56	16201.4
12.42_471.1456m/z	471.146	12.4241	neg	Edulisin I	HMDB0030594	87083			131751055	96608-82-1	JZZJEBOMWXWTEY-NTUHNPAUSA-N	Phenylpropanoids and polyketides	Coumarins and derivatives	Furanocoumarins	*	37.9	0	M-H2O-H	C28H26O8	1.3714	1.13443	0.0242747	0.263956	-2.04404	0.242483	2120.41	8744.57	2896.9	2846.57	4251.85	4.23678e-05	538.942	2188.2	18037.6	10336	9606.38	9827.1	3210.81	1449.54
1.26_462.0671m/z	462.067	1.26057	neg	Adenylsuccinic acid	HMDB0000536	3551		C03794	447145	19046-78-7	OFBHPPMPBOJXRT-VWJPMABRSA-N	Benzenoids	Benzene and substituted derivatives	Biphenyls and derivatives	**	55.4	0	M-H	C14H18N5O11P	0.789176	1.12866	0.0142341	0.20877	1.24708	2.3736	10477	4413.99	13858	15338.9	6442.03	3346.44	10910.9	12966	2133.31	5618.62	3442.78	4067.09	3805.41	7416.72
8.94_583.2550m/z	583.255	8.94127	pos	Biliverdin	HMDB0001008	5938		C00500	5353439		QBUVFDKTZJNUPP-BBROENKCSA-N	Organoheterocyclic compounds	Tetrapyrroles and derivatives	Bilirubins	**	45.1	0	M+H	C33H34N4O6	-0.118864	1.11482	0.0064856	0.150911	0.994103	1.99184	12029.5	6039.41	16622.2	17647.2	9849.54	8663.52	11675.5	7719.3	7062.01	5642.81	7028.97	6384.48	5245.13	4873.04
0.76_261.0200m/z	261.02	0.757467	neg	2-Fluoro-1-nitroimidazole	HMDB0252376				129651924		AJIUZGVELSOKAW-UHFFFAOYSA-N	Organohalogen compounds	Aryl halides	Aryl fluorides	*	38.8	0	2M-H	C3H2FN3O2	3.98096	1.10609	0.00308605	0.112721	0.644538	1.56324	15411	9858.4	16312.8	12680.3	16214.7	20800.3	13336.1	13122	7955.2	9165.21	9570.13	9240.27	10305	12914.6
12.25_531.1952m/z	531.195	12.2471	neg	3-Deazaadenosine	HMDB0245849				1651		DBZQFUNLCALWDY-UHFFFAOYSA-N	Nucleosides, nucleotides, and analogues	Imidazole[4,5-c]pyridine ribonucleosides and ribonucleotides	Unclassified	*	37.8	0	2M-H	C11H14N4O4	-0.915007	1.09776	0.0206942	0.24303	-0.81265	0.569335	8124.82	14270.7	11730.6	10524.6	11209.3	344.72	5347.98	9591.64	17236.6	13041.6	15708.2	18007.6	11715.6	9914.75
0.71_282.0653m/z	282.065	0.709183	neg	Deoxythioguanosine	HMDB0251016						XONAGRHHONPFHI-UHFFFAOYSA-N	Nucleosides, nucleotides, and analogues	Purine nucleosides	Purine 2',3'-dideoxyribonucleosides	*	36.5	0	M-H	C10H13N5O3S	-4.65841	1.09509	0.0471687	0.351207	0.926256	1.90034	14410.7	7583.21	16066.5	18855	24089.8	11496.2	5776.65	10179.8	3229.85	13200	8239.39	5329.31	7706.95	7793.71
11.37_468.3109m/z	468.311	11.3739	pos	N-Arachidonoyl tyrosine	HMDB0062331						QUMCPEFSPGOHMM-CGFYPUQWSA-N	Organic acids and derivatives	Carboxylic acids and derivatives	Amino acids, peptides, and analogues	*	38.8	0	M+H	C29H41NO4	0.039831	1.07926	0.00833928	0.164427	-1.73027	0.301396	2392.51	7938.09	2673.43	3277.39	3256.07	4.23678e-05	2116.9	3031.27	11261.9	11497.2	10649.6	7542.01	4855.44	1822.41
4.57_359.1254m/z	359.125	4.56858	neg	Cyclopropyl-methoxycarbonyl metomidate	HMDB0259618				77987166		DRAFVCKNYNQOKR-UHFFFAOYSA-N	Organoheterocyclic compounds	Azoles	Imidazoles	***	57.2	46	M+FA-H	C17H18N2O4	1.58854	1.07537	0.0160381	0.219327	0.635112	1.55306	17106.4	11014.7	18722.4	20666.1	21010	16246.8	10849.6	15143.7	14083.6	14586.3	13683.6	7718.35	8537.45	7478.71
0.69_282.9625m/z	282.963	0.69395	neg	Ethylphosphorothioic acid	HMDB0252086				11970524		OJZGWRZUOHSWMB-UHFFFAOYSA-N	Organic acids and derivatives	Organic thiophosphoric acids and derivatives	Thiophosphoric acid esters	*	37.7	0	2M-H	C2H7O3PS	-3.0981	1.07082	0.0138978	0.206849	-1.52134	0.348362	2937.39	8431.98	6402.05	1171.84	1287.46	6887.08	732.454	1143.43	10897.3	9297.03	12462.4	9577.02	4471.55	3886.53
4.11_975.4324m/z	975.432	4.11317	neg	Euchrenone a12		53001	LMPK12140519		42608046		AFNMVZWHERFZJC-UHFFFAOYSA-N	Lipids and lipid-like molecules	Polyketides	Flavonoids	*	37.1	0	2M-H	C30H32O6	-0.124798	1.06571	0.0110796	0.185601	0.782604	1.72023	11739.6	6824.41	11256.1	15248.5	13110.1	7696.83	13315	9810.95	5665.71	9261.08	4366.44	4370.76	6184.81	11097.7
12.36_127.0513m/z	127.051	12.3559	neg	Cyclic Urea	HMDB0250626				71482479		ZMGMDXCADSRNCX-UHFFFAOYSA-N	Organoheterocyclic compounds	Diazepanes	1,3-diazepanes	*	49.5	51.4	M-H2O-H	C5H10N2O3	0.0534843	1.06514	0.00701404	0.156506	0.198331	1.14737	42597.9	37126.6	42850.1	41120.7	43297.5	44564.8	43271.8	40482.8	32556.9	33058.1	40291.8	37467.5	37905.8	41479.4
4.15_502.2991m/z	502.299	4.15238	pos	17-hydroxyandrostane-3-glucuronide			LMST05010036		118701010		OGXFAGFSKKOOPU-MHOXWPRQSA-N	Lipids and lipid-like molecules	Steroids and steroid derivatives	Steroid conjugates	*	38.1	0	M+NH4	C25H40O9	-4.03308	1.0601	0.027599	0.278387	-0.480593	0.716683	15567.3	21721.3	14506.2	15697.7	10254.9	12544.4	18432.8	21967.6	18681.8	21699.1	17465	29198.3	21288.5	21995
12.24_385.1669m/z	385.167	12.2418	pos	Mesulergine	HMDB0254486				5251926		JLVHTNZNKOSCNB-UHFFFAOYSA-N	Organoheterocyclic compounds	Quinolines and derivatives	Indoloquinolines	*	37.3	0	M+Na	C18H26N4O2S	0.144759	1.05783	0.0261141	0.272325	-0.92343	0.527254	6849.06	12990.1	9335.77	9128.6	10230.5	370.396	5816.78	6212.34	13080.9	13588.5	20446.8	14060.5	7910.1	8853.57
11.03_548.2979m/z	548.298	11.0326	pos	PG(20:5(5Z,8Z,11Z,14Z,17Z)/0:0)		80018	LMGP04050030		52927453		UBJZUYNJJSKNCQ-MTVYBJJPSA-N	Lipids and lipid-like molecules	Glycerophospholipids	Glycerophosphoglycerols	*	38.1	0	M+NH4	C26H43O9P	-0.656384	1.05504	0.0224272	0.252577	-1.03971	0.486427	5571.76	11454.5	6609.78	8510.2	10709	563.149	3897.84	3140.54	12059.9	15667.2	10503.2	15211.4	9947.9	5337.22
6.26_414.1383m/z	414.138	6.25955	neg	2-[5-Methoxy-2-methyl-1-[(4-methylsulfanylphenyl)methyl]indol-3-yl]propanoic acid	HMDB0254775				6451644		QTUGRCJHUSVWGW-UHFFFAOYSA-N	Organoheterocyclic compounds	Indoles and derivatives	Indolyl carboxylic acids and derivatives	*	37.8	0.299	M+FA-H	C21H23NO3S	0.707669	1.05154	0.0288012	0.283989	3.51512	11.4329	6491.29	567.772	3367.74	14307.5	3971.52	613.53	12958.7	3728.77	797.734	1089.48	445.675	206.977	363.558	503.211
6.25_443.1262m/z	443.126	6.2536	pos	Fulvinervin C		48613	LMPK12110180		44257642		BXQGCKPPJCXQCL-ZRDIBKRKSA-N	Lipids and lipid-like molecules	Polyketides	Flavonoids	*	38.4	4.04	M+K	C25H24O5	1.56476	1.05137	0.00482496	0.134137	7.60897	195.222	5080.49	26.0241	3278.95	9110.3	4684.74	535.092	9181.07	3692.79	54.7468	18.8076	4.23678e-05	22.7119	25.1625	34.716
4.24_361.1508m/z	361.151	4.23755	neg	3-Methyl-3-butenyl apiosyl-(1->6)-glucoside	HMDB0031954	88066			131751223	198832-72-3	DZEALCQVCAOHSL-UHFFFAOYSA-N	Lipids and lipid-like molecules	Fatty Acyls	Fatty acyl glycosides	***	65.6	40.6	M-H2O-H	C16H28O10	1.14188	1.04581	0.0157316	0.217346	6.52864	92.3243	5975.66	64.7247	1374.4	2930.9	1956.2	5936.42	9687.2	13968.8	4.23678e-05	26.7649	29.7348	28.2072	49.1771	254.464
5.02_481.1310m/z	481.131	5.02187	neg	Phlorizin	HMDB0036634	3535		C01604	6072	60-81-1	IOUVKUPGCMBWBT-QNDFHXLGSA-N	Phenylpropanoids and polyketides	Flavonoids	Flavonoid glycosides	**	41.3	0	M+FA-H	C21H24O10	-9.55325	1.04289	0.0141188	0.208028	4.57707	23.8691	5903.73	247.338	342.688	8674.67	1350.24	4082.86	11882.1	9089.84	0.761967	39.7534	47.144	473.698	781.597	141.074
4.99_169.1223m/z	169.122	4.99247	pos	exo,exo-1,8-Epoxy-p-menthane-2,6-diol	HMDB0041376	71823		C17620	115056	38223-98-2	JSNQSLSBBZFGBM-UHFFFAOYSA-N	Organoheterocyclic compounds	Oxanes	Unclassified	**	50.3	30	M+H-H2O	C10H18O3	0.138707	1.04051	0.0040891	0.125611	1.92134	3.78776	6937.12	1831.46	2781.54	9668.82	3252.41	6067.6	9842.39	10010	1877.39	1684.16	1771.74	2050.64	1878.52	1726.29
11.75_304.2635m/z	304.263	11.7514	pos	Arachidonoyl amine		36680	LMFA08010007		5283393	85146-53-8	BNBSCAZCQDLUDU-DOFZRALJSA-N	Lipids and lipid-like molecules	Fatty Acyls	Fatty amides	*	39.5	0	M+H	C20H33NO	-0.116708	1.04017	0.00541979	0.139109	-1.33638	0.396014	3155.62	7968.45	2195.49	4553.38	3991.73	578.313	3220.05	4394.73	8517.81	9333.42	10816.8	10251.1	5789.01	3102.54
12.43_349.2109m/z	349.211	12.4301	pos	Tetramethrin	HMDB0258915	72185		C18373	83975	7696-12-0	CXBMCYHAMVGWJQ-UHFFFAOYSA-N	Organoheterocyclic compounds	Isoindoles and derivatives	Isoindolines	*	37.9	0	M+NH4	C19H25NO4	-4.02553	1.03748	0.00609272	0.14733	-0.876029	0.544865	6107.49	11209.2	7403.9	6022.45	8730.85	1259.43	5669.42	7558.92	13145.6	13201.5	12375.7	12439.6	8309.69	7782.99
10.56_319.2279m/z	319.228	10.5632	neg	Androsterol	HMDB0303012						LYFPAZBMEUSVNA-CDVCEDLFSA-N	Lipids and lipid-like molecules	Steroids and steroid derivatives	Androstane steroids	***	68.2	55.4	M+FA-H	C19H30O	0.188109	1.03519	0.000691593	0.0598523	0.582742	1.49769	14495.8	9678.75	12646.1	12277.9	17377	13416.9	15282	15974.9	11672.4	8895.49	9520.23	9012.51	10916.6	8055.19
12.20_586.4246m/z	586.425	12.2042	pos	Cer(d16:1/18:2(10E,12Z)+=O(9))	HMDB0289862						QYSVVOPPSMBPSS-WQAWXJNVSA-N	Unclassified	Unclassified	Unclassified	*	38.3	0.556	M+K	C34H61NO4	2.58385	1.02077	0.0362011	0.315645	-0.781497	0.581763	9219.31	15847.2	10965.8	17981.4	11849	1956.29	7561.15	5002.25	15558.8	12051.7	13359.9	19457.7	13630.8	21024.3
10.66_630.3417m/z	630.342	10.6604	neg	OKOOA-PE			LMGP20020044		134812374		AIJDATWGBVIZEN-ZEWFGLQISA-N	Lipids and lipid-like molecules	Glycerophospholipids	Oxidized glycerophospholipids	*	38.7	0	M-H	C31H54NO10P	0.635107	1.02003	0.0322829	0.299524	-1.36373	0.388577	3243.69	8347.61	2080.74	4301.2	6398.67	1366.93	1342.29	3972.3	6846.02	6795.15	12468.5	15118.6	6464.11	2393.34
6.31_525.1440m/z	525.144	6.31167	neg	Estriol 3-sulfate 16-glucuronide			LMST05010047		44263369		ATNWFRGUDKUYOG-JRSYHJKYSA-N	Lipids and lipid-like molecules	Steroids and steroid derivatives	Steroid conjugates	*	50.1	63	M-H2O-H	C24H32O12S	0.759908	1.01803	0.00136731	0.0776603	26.7308	1.11373e+08	4718.63	4.23678e-05	3082.15	2783.73	3229.15	5608.71	3921.92	9686.12	4.23678e-05	4.23678e-05	4.23678e-05	4.23678e-05	4.23678e-05	4.23678e-05
5.51_433.1144m/z	433.114	5.51168	neg	7-Hydroxybutylidenephthalide 7-(6-malonylglucoside)	HMDB0034753	90179			131751618	240823-20-5	CCRZCLUIQCKUKD-IZZDOVSWSA-N	Organic oxygen compounds	Organooxygen compounds	Carbohydrates and carbohydrate conjugates	**	53.8	0	M-H2O-H	C21H24O11	0.82126	1.01704	0.0209471	0.244034	1.54503	2.91811	8277.09	2836.45	10183.9	15390.1	10861.9	3404.39	4651.01	5171.15	394.8	2093.19	2457.8	4292.2	3657.67	4123.07
3.05_192.0425n	210.076	3.04918	pos	Scopoletin	HMDB0034344	6956		C01752	5280460	92-61-5	RODXRVNMMDRFIK-UHFFFAOYSA-N	Phenylpropanoids and polyketides	Coumarins and derivatives	Hydroxycoumarins	*	50	54.3	M+H, M+NH4	C10H8O4	1.33101	1.01506	1.60483e-06	0.00624144	2.46333	5.51488	4749.14	861.15	5179.08	3626.2	5886.54	5036.33	5195.2	3571.46	1140.6	769.086	962.942	811.368	676.441	806.468
9.30_538.3210m/z	538.321	9.30318	neg	Leu-Arg-Asn-Arg	HMDB0304803	181313			22702886		PFUDAVBUJIYNMF-UHFFFAOYSA-N	Organic acids and derivatives	Carboxylic acids and derivatives	Amino acids, peptides, and analogues	*	38.6	0	M-H2O-H	C22H43N11O6	-1.59324	1.015	0.00657693	0.151503	-1.69805	0.308203	2172.16	7047.81	1564.56	886.845	2182.77	3629.1	3459.68	1309.99	5629.28	2466.64	4537.07	9155.85	10623.7	9874.26
0.74_248.0705n	293.069	0.741033	neg	3-(3-(Pyridin-3-yl)-1,2,4-oxadiazol-5-yl)benzonitrile	HMDB0247644				11998180		HGFXDSQLRSWUBO-UHFFFAOYSA-N	Organoheterocyclic compounds	Azoles	Oxadiazoles	*	40.1	10.1	M+FA-H, 2M-H	C14H8N4O	2.72783	1.0149	0.0132174	0.203046	-0.420081	0.747382	18151.2	24286.4	16966.7	17098.4	13771.6	18355.3	22588.4	20126.8	22436.1	31477.7	22020.9	22381.8	20953.6	26447.9
10.14_290.1399m/z	290.14	10.1377	neg	Bisnortilidin	HMDB0249273				521475		BTKAMSWFNMGLGM-UHFFFAOYSA-N	Organic acids and derivatives	Carboxylic acids and derivatives	Amino acids, peptides, and analogues	*	37.7	0	M+FA-H	C15H19NO2	0.54457	1.01241	6.78641e-05	0.0251381	-6.94659	0.00810716	33.2059	4095.88	4.23678e-05	87.8711	4.23678e-05	111.364	4.23678e-05	4.23678e-05	5795.55	5346.29	4859.51	3930.65	1932.88	2710.39
7.18_379.1378m/z	379.138	7.17835	neg	4-(4-Methylpiperazin-1-yl)-7-(trifluoromethyl)pyrrolo[1,2-a]quinoxaline	HMDB0249864						LXFHSCDLMBZYKY-UHFFFAOYSA-N	Organoheterocyclic compounds	Diazanaphthalenes	Benzodiazines	*	48.5	50.3	M+FA-H	C17H17F3N4	-2.81181	1.0083	0.0151269	0.213487	26.8719	1.22813e+08	5203.34	4.23678e-05	6078.46	13275.9	5034.57	1732.18	1380.53	3718.38	4.23678e-05	4.23678e-05	4.23678e-05	4.23678e-05	4.23678e-05	4.23678e-05
12.02_479.1914m/z	479.191	12.0229	neg	Acevaltrate	HMDB0034494		LMFA07010774	C16752	22245467		FWKBQAVMKVZEOT-UHFFFAOYSA-N	Organic acids and derivatives	Carboxylic acids and derivatives	Tetracarboxylic acids and derivatives	*	38.6	0	M-H	C24H32O10	-1.75312	1.00647	0.0130558	0.201227	-1.16167	0.446996	4354.38	9741.45	4730.58	7493.02	6426.9	1144.54	2827.06	3504.19	13567.2	14807	7984.32	9646.55	6447.93	5995.69
